# Supplementary material for: Designable assembly of atomically precise Al4O4 cubane supported mesoporous heterometallic architectures
Source: Royal Society of Chemistry journal article supplement (doi:10.1039/d2sc00526c), 2022-01-01
Supplement: d2sc00526c1.pdf [file d2sc00526c1.pdf]

## Supporting Information

### Designable Assembly of Atomically Precise Al<sub>4</sub>O<sub>4</sub> Cubane Supported Mesoporous Heterometallic Architectures

Ya-Jie Liu, Ying-Hua Yu, Yi-Fan Sun, Wei-Hui Fang\* and Jian Zhang\*

#### Table of Content

|                                                                                                         |     |
|---------------------------------------------------------------------------------------------------------|-----|
| 1. The supertetrahedral clusters and 2-fold interpenetrated frameworks in AIOC-99 to AIOC-108.....      | S2  |
| 2. The supertetrahedral clusters and non-interpenetrated frameworks in AIOC-109 to AIOC-111.....        | S6  |
| 3. The supertetrahedral clusters and lonsdaleite ( <i>lon</i> ) frameworks in AIOC-112 to AIOC-120..... | S7  |
| 4. The detail coordination environment information for Al ion, Co ion and ligands in AIOC-99.....       | S10 |
| 5. The packing of supertetrahedral cluster in AIOC-112.....                                             | S12 |
| 6. The mesoporous cavity in non-interpenetrated diamond ( <i>dia</i> ) frameworks.....                  | S12 |
| 7. The N <sub>2</sub> and CO <sub>2</sub> sorption isotherms of AIOC-99, AIOC-109 and AIOC-112.....     | S13 |
| 8. The stabilities and hydrophobic properties of AIOC-99, AIOC-109 and AIOC-112.....                    | S14 |
| 9. PXRD analyses.....                                                                                   | S18 |
| 10. FT-IR spectra.....                                                                                  | S20 |
| 11. The EDS spectra.....                                                                                | S22 |
| 12. The XPS spectra.....                                                                                | S33 |
| 13. The UV-vis absorption spectra and Tau plots.....                                                    | S39 |
| 14. Catalytic stability.....                                                                            | S40 |
| References.....                                                                                         | S48 |

# 1. The supertetrahedral clusters and 2-fold interpenetrated frameworks in AIOC-99 to AIOC-108.

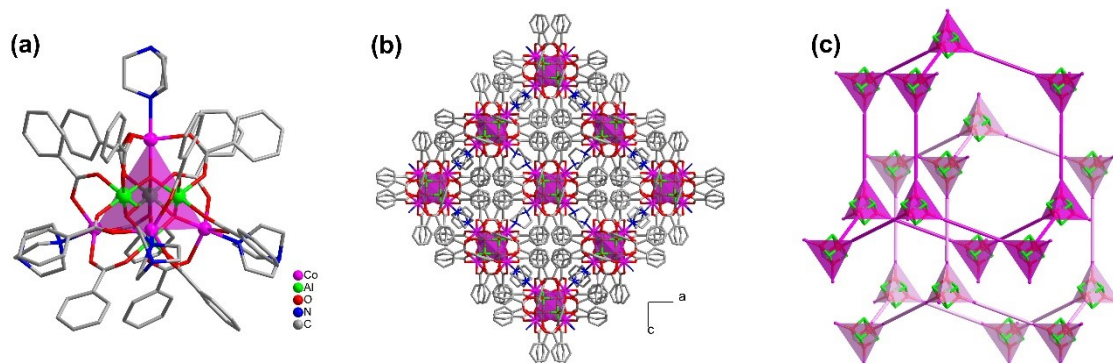

**Fig. S1.** (a) Structure of the heterometallic supertetrahedral cluster in **AIOC-99**; (b) 3D framework showing the arrangement of supertetrahedral clusters in **AIOC-99**; (c) The 2-fold interpenetrated structure of **AIOC-99**.

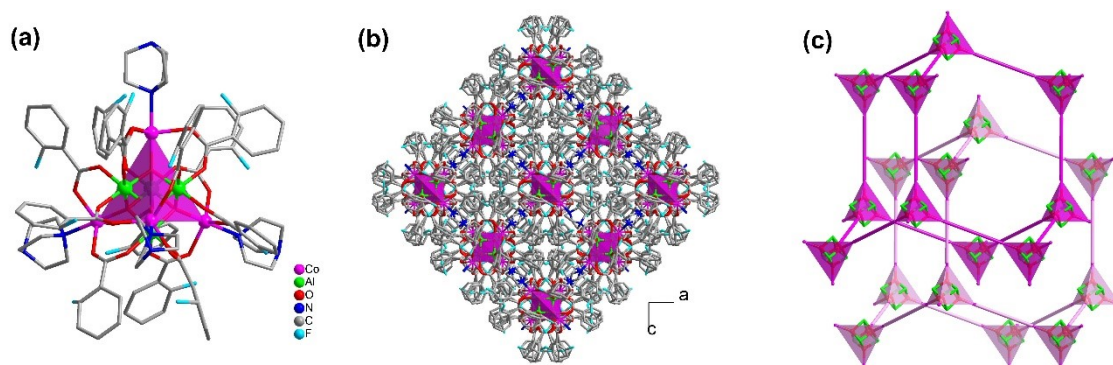

**Fig. S2.** (a) Structure of the heterometallic supertetrahedral cluster in **AIOC-100**; (b) 3D framework showing the arrangement of supertetrahedral clusters in **AIOC-100**; (c) The 2-fold interpenetrated structure of **AIOC-100**.

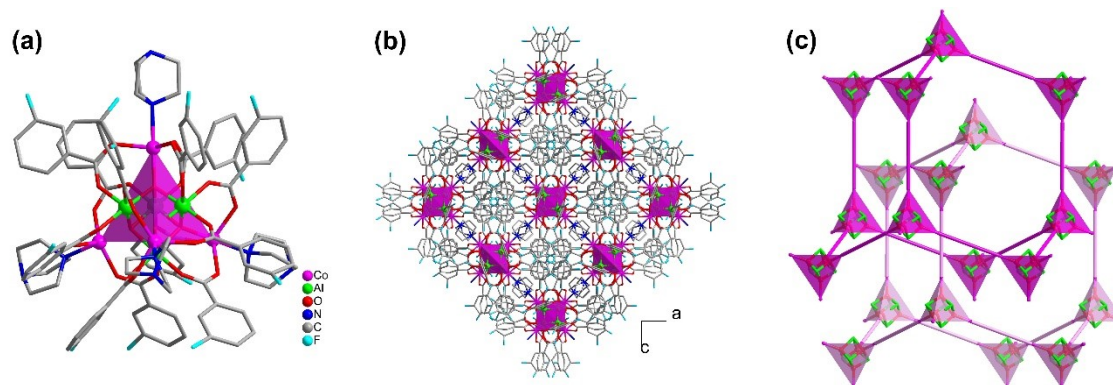

**Fig. S3.** (a) Structure of the heterometallic supertetrahedral cluster in **AIOC-101**; (b) 3D framework showing the arrangement of supertetrahedral clusters in **AIOC-101**; (c) The 2-fold interpenetrated structure of **AIOC-101**.

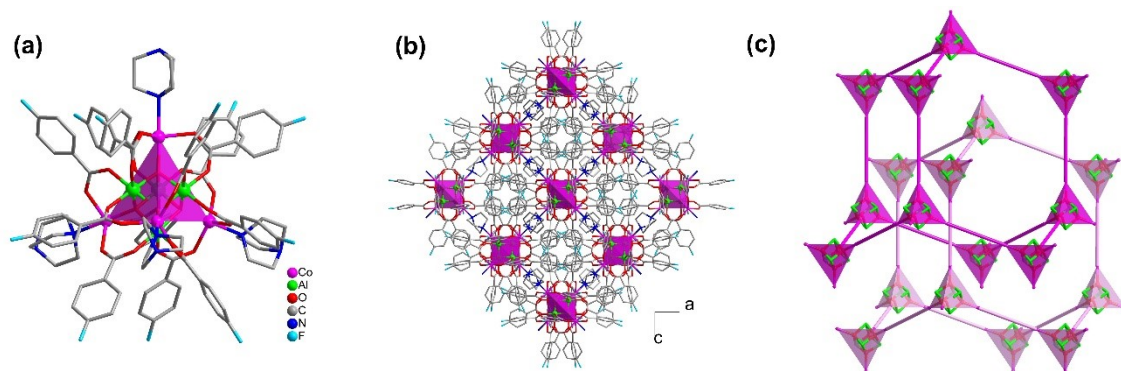

**Fig. S4.** (a) Structure of the heterometallic supertetrahedral cluster in **AIOC-102**; (b) 3D framework showing the arrangement of supertetrahedral clusters in **AIOC-102**; (c) The 2-fold interpenetrated structure of **AIOC-102**.

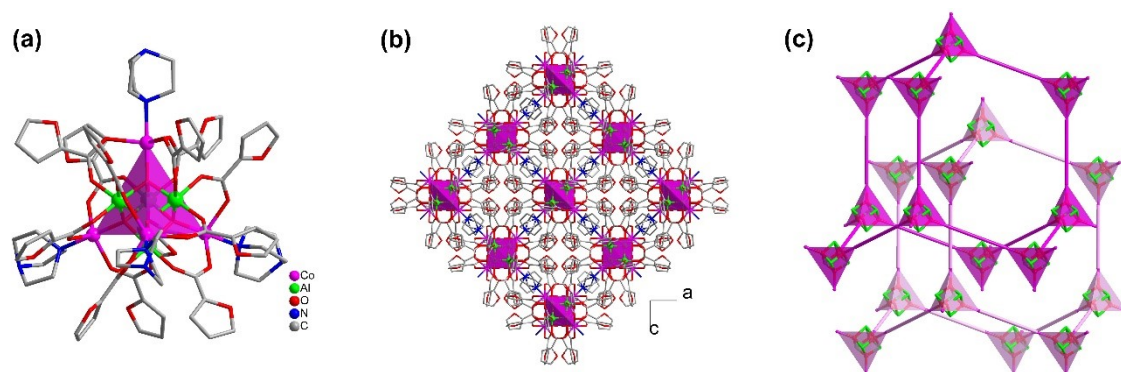

**Fig. S5.** (a) Structure of the heterometallic supertetrahedral cluster in **AIOC-103**; (b) 3D framework showing the arrangement of supertetrahedral clusters in **AIOC-103**; (c) The 2-fold interpenetrated structure of **AIOC-103**.

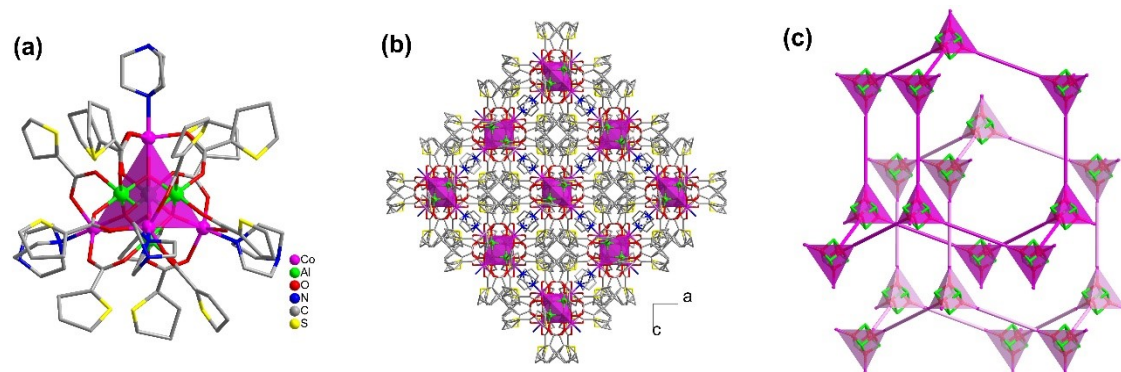

**Fig. S6.** (a) Structure of the heterometallic supertetrahedral cluster in **AIOC-104**; (b) 3D framework showing the arrangement of supertetrahedral clusters in **AIOC-104**; (c) The 2-fold interpenetrated structure of **AIOC-104**.

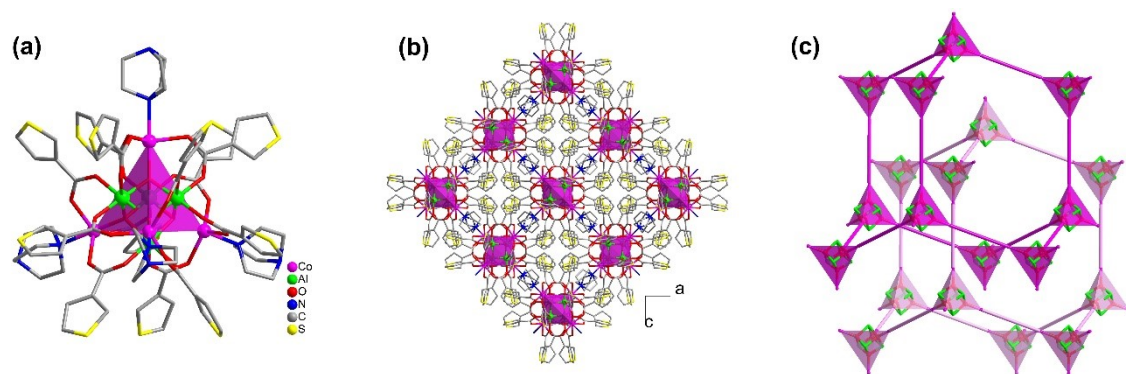

**Fig. S7.** (a) Structure of the heterometallic supertetrahedral cluster in **AIOC-105**; (b) 3D framework showing the arrangement of supertetrahedral clusters in **AIOC-105**; (c) The 2-fold interpenetrated structure of **AIOC-105**.

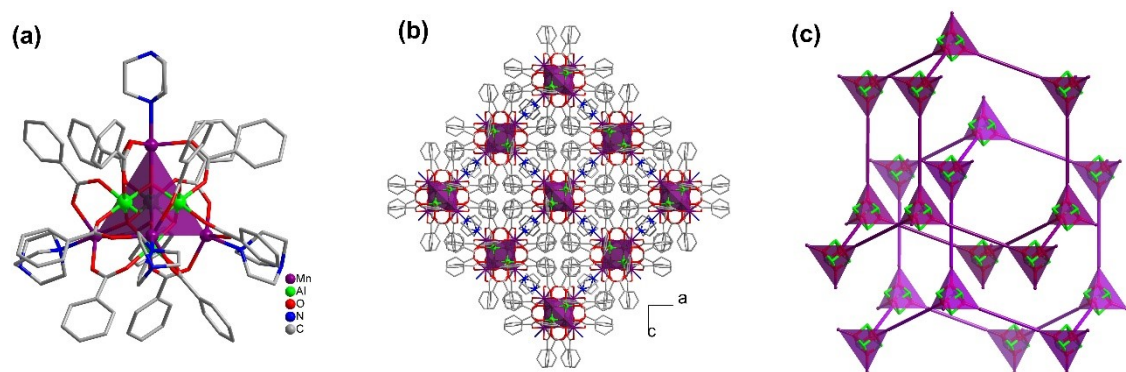

**Fig. S8.** (a) Structure of the heterometallic supertetrahedral cluster in **AIOC-106**; (b) 3D framework showing the arrangement of supertetrahedral clusters in **AIOC-106**; (c) The 2-fold interpenetrated structure of **AIOC-106**.

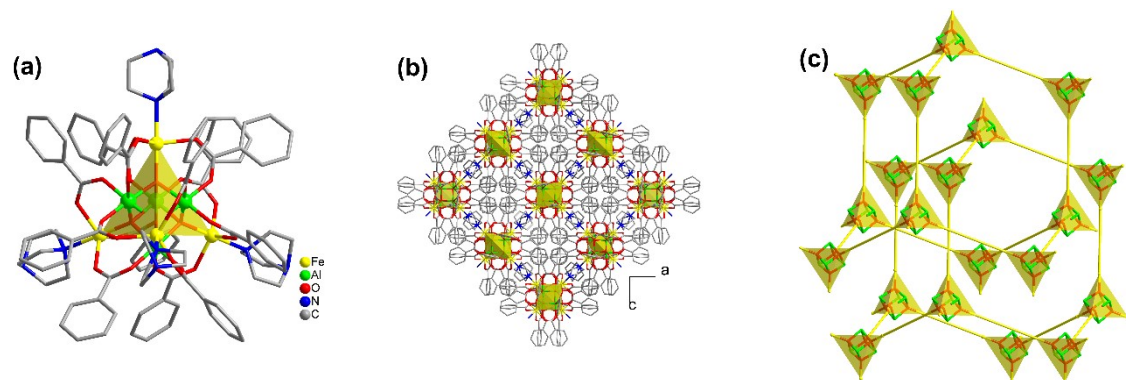

**Fig. S9.** (a) Structure of the heterometallic supertetrahedral cluster in **AIOC-107**; (b) 3D framework showing the arrangement of supertetrahedral clusters in **AIOC-107**; (c) The 2-fold interpenetrated structure of **AIOC-107**.

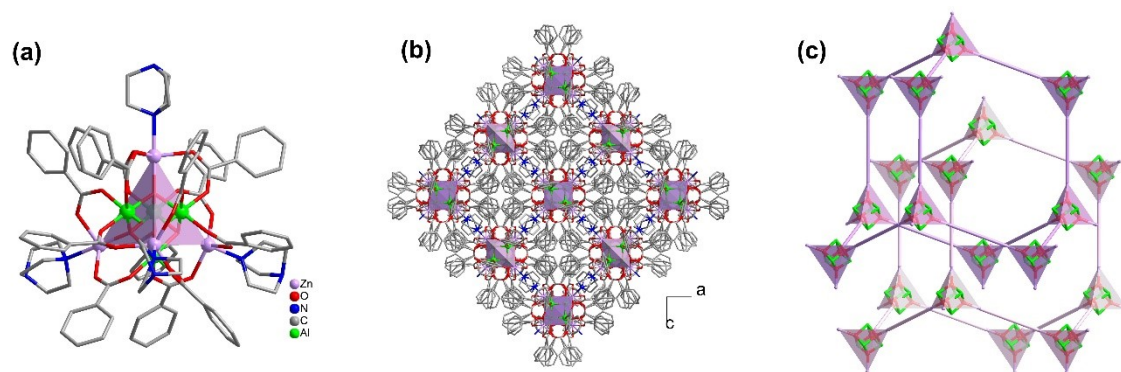

**Fig. S10.** (a) Structure of the heterometallic supertetrahedral cluster in **AIOC-108**; (b) 3D framework showing the arrangement of supertetrahedral clusters in **AIOC-108**; (c) The 2-fold interpenetrated structure of **AIOC-108**.

## 2. The supertetrahedral clusters and non-interpenetrated frameworks in AIOC-109 to AIOC-111.

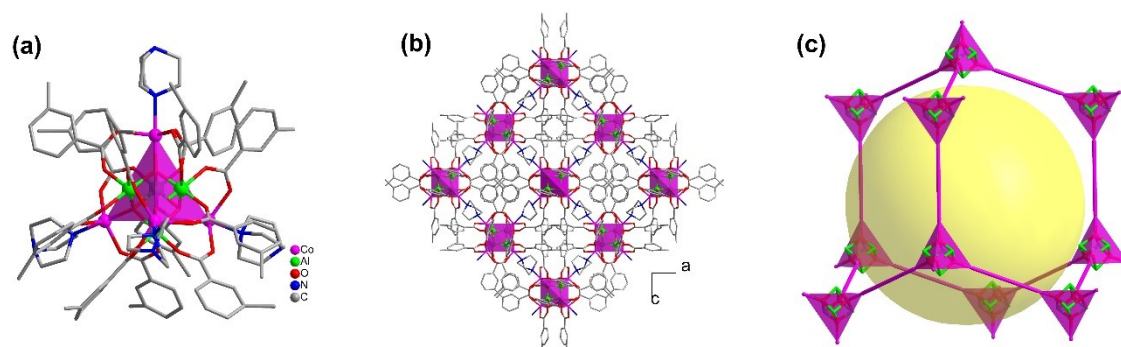

**Fig. S11.** (a) Structure of the heterometallic supertetrahedral cluster in **AIOC-109**; (b) 3D framework showing the arrangement of supertetrahedral clusters in **AIOC-109**; (c) The non-interpenetrated structure of **AIOC-109**.

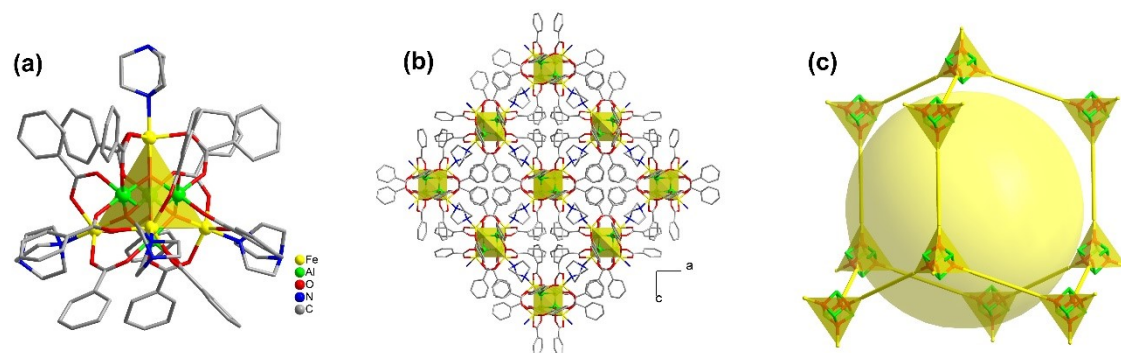

**Fig. S12.** (a) Structure of the heterometallic supertetrahedral cluster in **AIOC-110**; (b) 3D framework showing the arrangement of supertetrahedral clusters in **AIOC-110**; (c) The non-interpenetrated structure of **AIOC-110**.

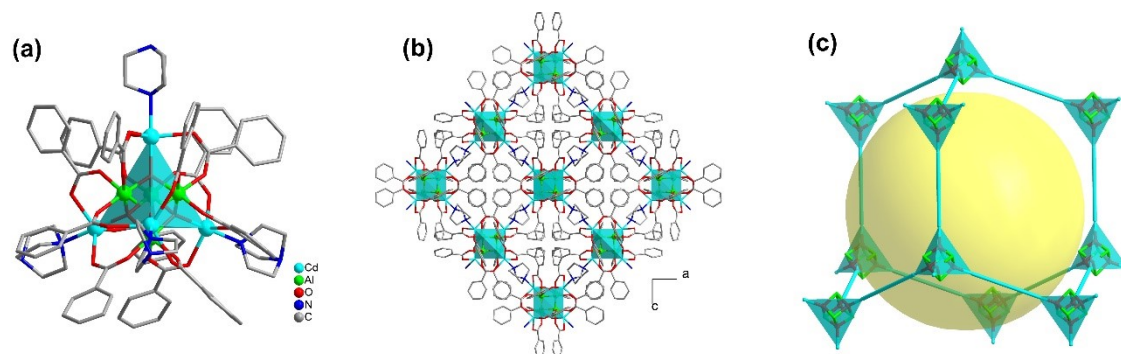

**Fig. S13.** (a) Structure of the heterometallic supertetrahedral cluster in **AIOC-111**; (b) 3D framework showing the arrangement of supertetrahedral clusters in **AIOC-111**; (c) The non-interpenetrated structure of **AIOC-111**.

### 3. The supertetrahedral clusters and lonsdaleite (*lon*) frameworks in AIOC-112 to AIOC-120.

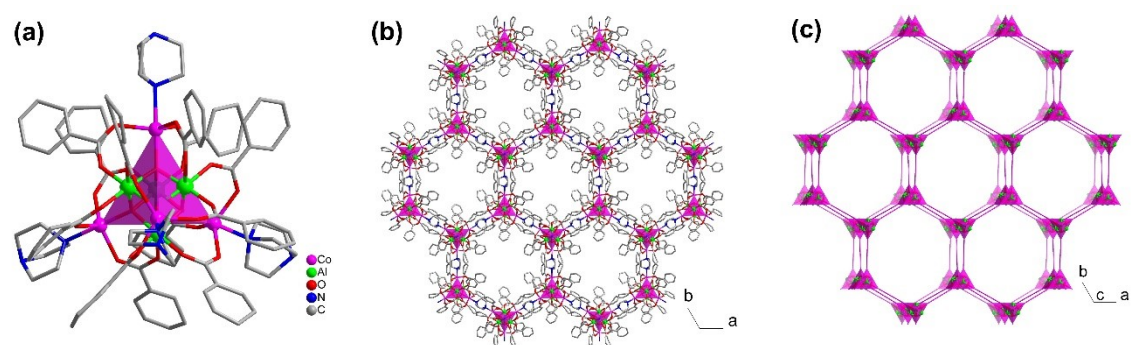

**Fig. S14.** (a) Structure of the heterometallic supertetrahedral cluster in **AIOC-112**; (b) 3D framework showing the arrangement of supertetrahedral clusters in **AIOC-112**; (c) The non-interpenetrated 3D topological structure of **AIOC-112**.

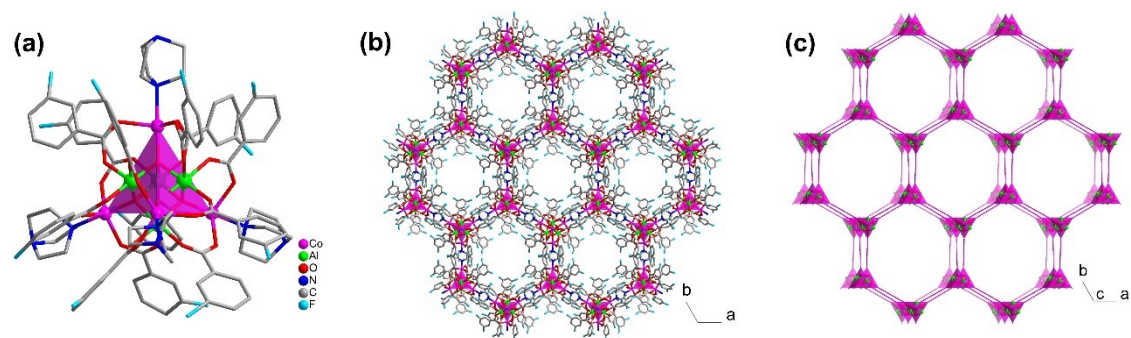

**Fig. S15.** (a) Structure of the heterometallic supertetrahedral cluster in **AIOC-113**; (b) 3D framework showing the arrangement of supertetrahedral clusters in **AIOC-113**; (c) The non-interpenetrated 3D topological structure of **AIOC-113**.

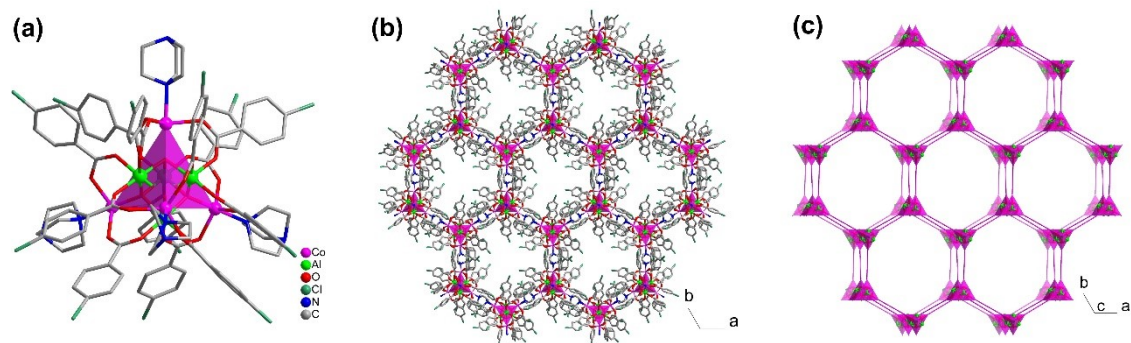

**Fig. S16.** (a) Structure of the heterometallic supertetrahedral cluster in **AIOC-114**; (b) 3D framework showing the arrangement of supertetrahedral clusters in **AIOC-114**; (c) The non-interpenetrated 3D topological structure of **AIOC-114**.

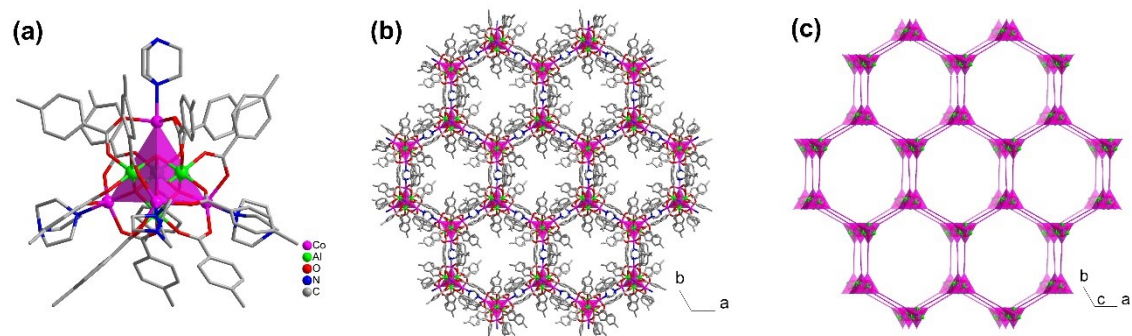

**Fig. S17.** (a) Structure of the heterometallic supertetrahedral cluster in **AIOC-115**; (b) 3D framework showing the arrangement of supertetrahedral clusters in **AIOC-115**; (c) The non-interpenetrated 3D topological structure of **AIOC-115**.

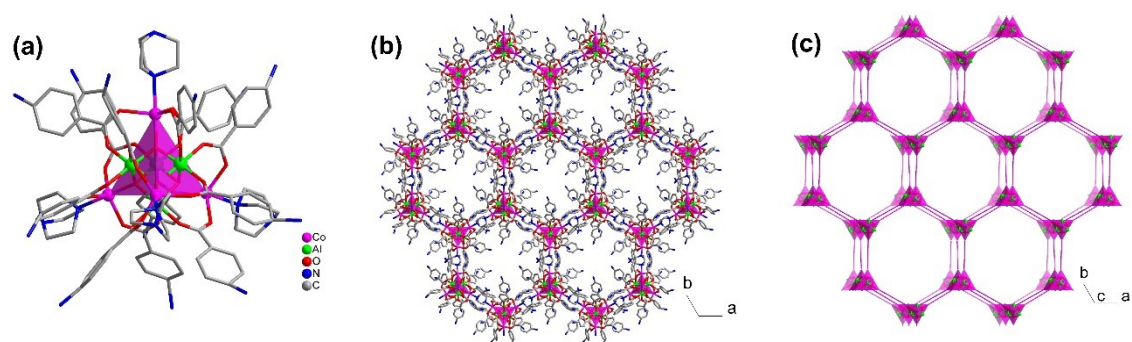

**Fig. S18.** (a) Structure of the heterometallic supertetrahedral cluster in **AIOC-116**; (b) 3D framework showing the arrangement of supertetrahedral clusters in **AIOC-116**; (c) The non-interpenetrated 3D topological structure of **AIOC-116**.

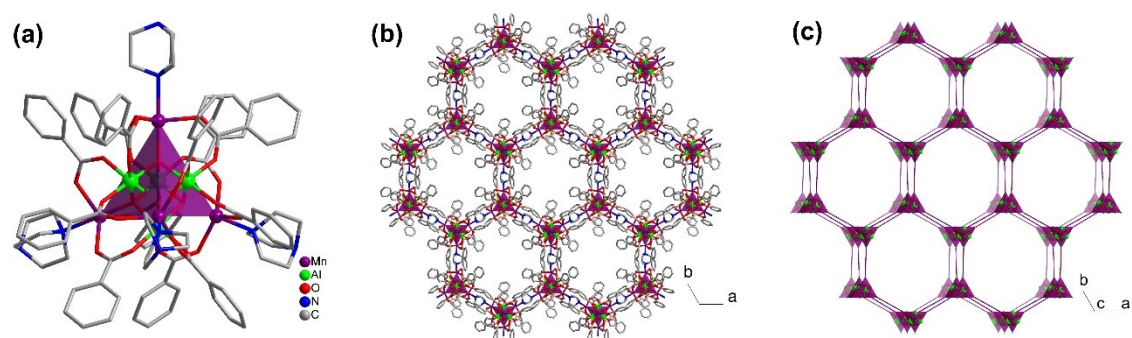

**Fig. S19.** (a) Structure of the heterometallic supertetrahedral cluster in **AIOC-117**; (b) 3D framework showing the arrangement of supertetrahedral clusters in **AIOC-117**; (c) The non-interpenetrated 3D topological structure of **AIOC-117**.

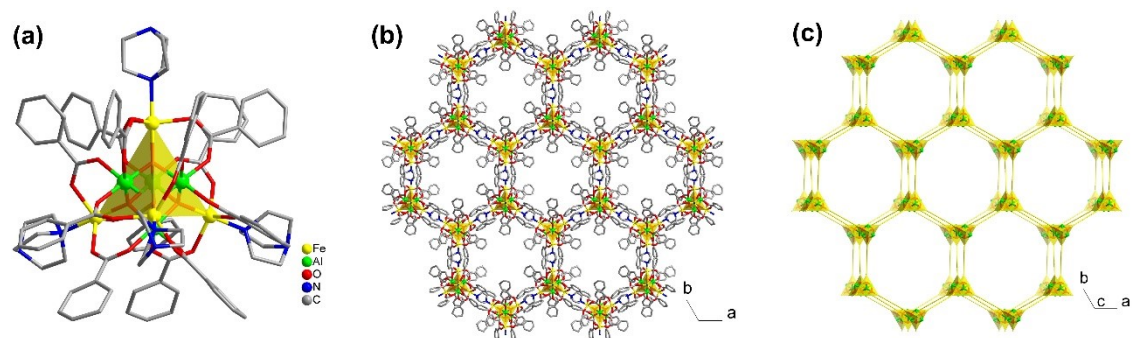

**Fig. S20.** (a) Structure of the heterometallic supertetrahedral cluster in **AIOC-118**; (b) 3D framework showing the arrangement of supertetrahedral clusters in **AIOC-118**; (c) The non-interpenetrated 3D topological structure of **AIOC-118**.



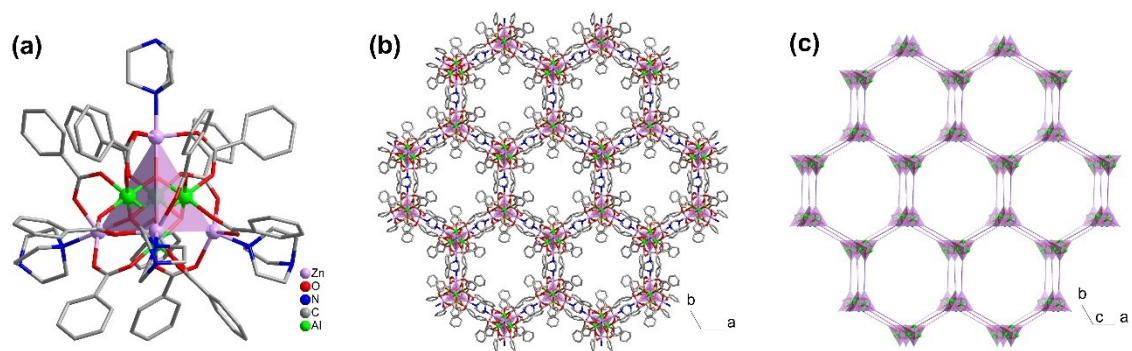

**Fig. S21.** (a) Structure of the heterometallic supertetrahedral cluster in **AIOC-119**; (b) 3D framework showing the arrangement of supertetrahedral clusters in **AIOC-119**; (c) The non-interpenetrated 3D topological structure of **AIOC-119**.

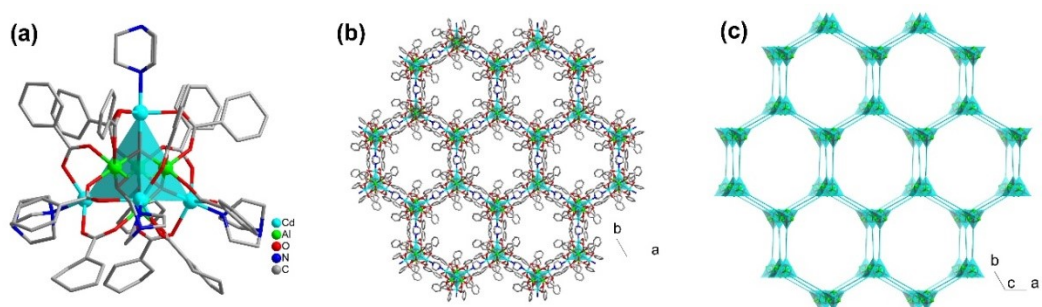

**Fig. S22.** (a) Structure of the heterometallic supertetrahedral cluster in **AIOC-120**; (b) 3D framework showing the arrangement of supertetrahedral clusters in **AIOC-120**; (c) The non-interpenetrated 3D topological structure of **AIOC-120**.

#### 4. The detail coordination environment information for Al ion, Co ion and ligands in AIOC-99.

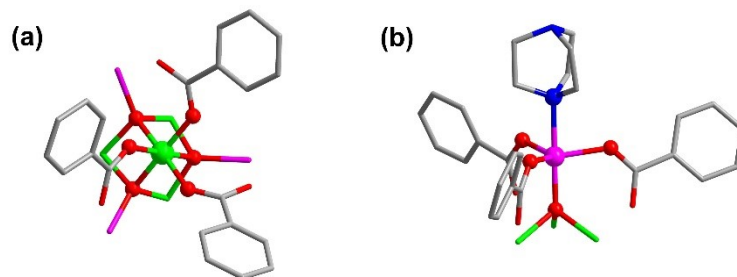

**Fig. S23.** The coordination environments of Al (a) and Co (b) ions. Colour code: Al green; Co pink; N blue; O red; C grey. H atoms are omitted for clarity.

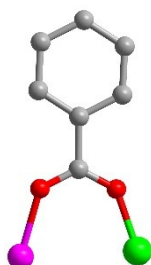

**Fig. S24.** The coordination mode of benzoate. Colour code: Al green; Co pink; O red; C grey. H atoms are omitted for clarity.

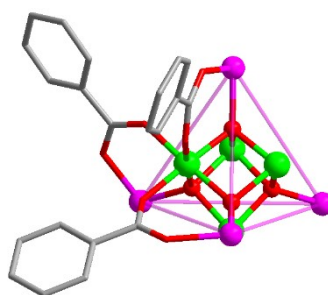

**Fig. S25.** The face-capping view of the supertetrahedral cluster. Colour code: Al green; Co pink; O red; C grey. H atoms are omitted for clarity.

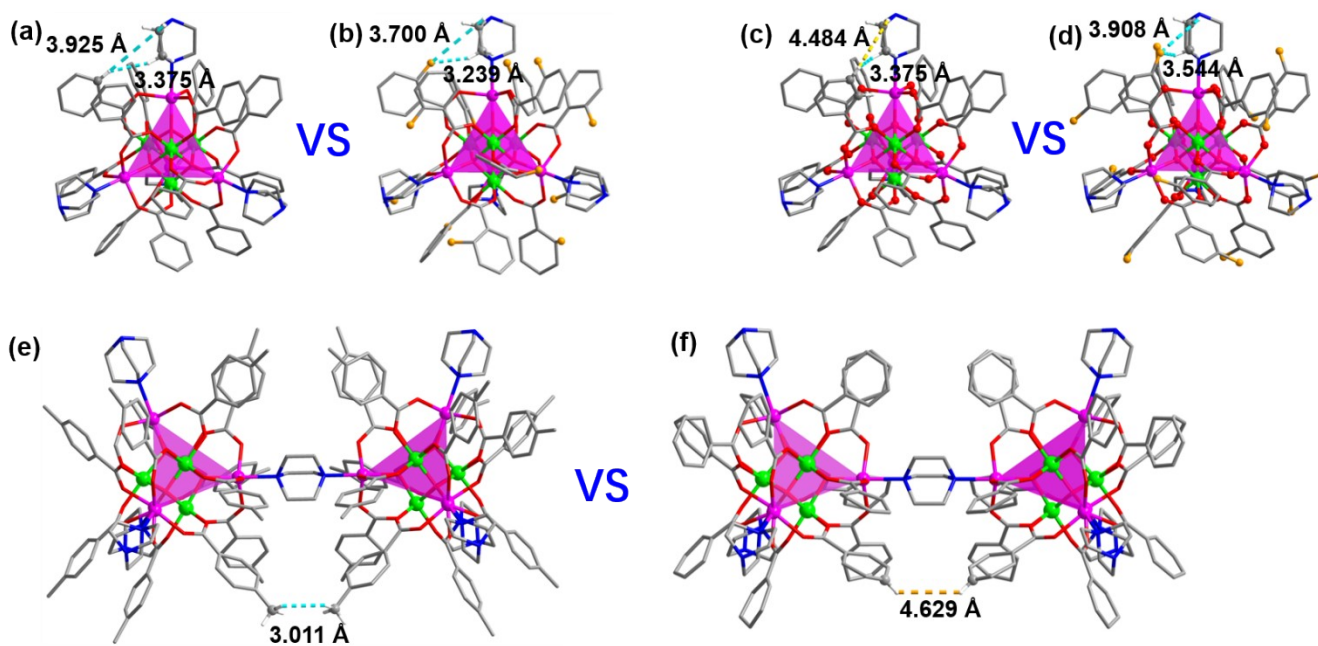

**Fig. S26.** The comparison of hydrogen bonds in different chelated ligands modified frameworks. (a) and (b) The hydrogen bond positions and lengths in **AIOc-99** (a) and **AIOc-100** (b); (c) and (d) the hydrogen bond positions and lengths in **AIOc-99** (c) and **AIOc-101** (d), the dotted yellow line indicates that the bond length is too long to form hydrogen bond in **AIOc-99**; (e) and (f) the hydrogen bond positions and lengths in **AIOc-115** (e) and **AIOc-112** (f), the dotted yellow line indicates that the bond length is too long to form hydrogen bond in **AIOc-112**. Colour code: Al green; Co pink; O red; C grey; F orange. H atoms are omitted for clarity.

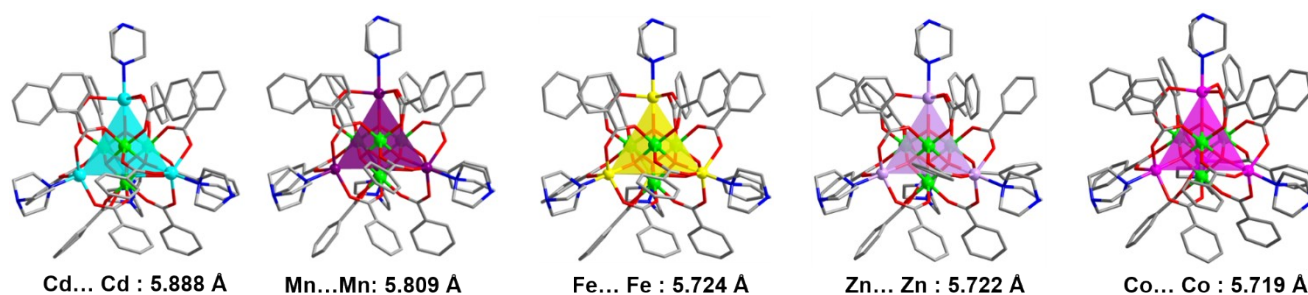

**Fig. S27.** The size of the different supertetrahedral cluster. Colour code: Al green; Cd turquoise; Mn violet; Fe yellow; Zn lavender; Co pink; O red; C grey. H atoms are omitted for clarity.

## 5. The packing of supertetrahedral cluster in AIOC-112.

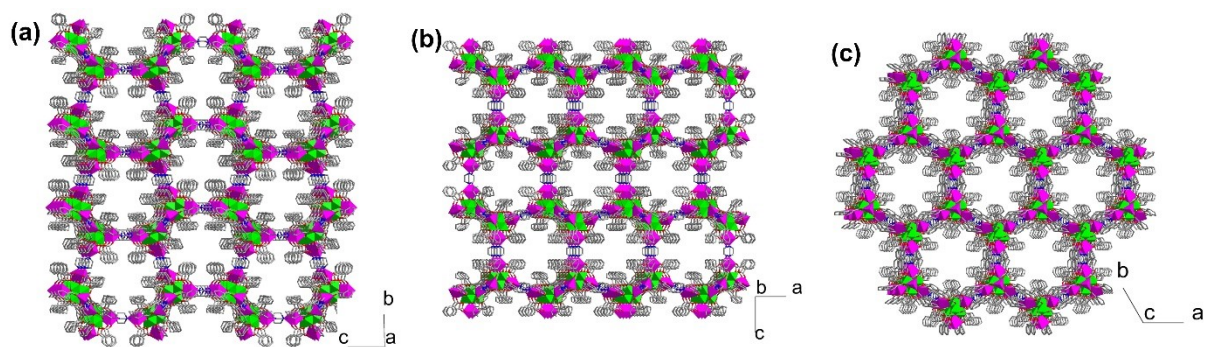

Fig. S28. View of the 3D frameworks of AIOC-112 along the a axis (a), b axis (b) and c axis (c).

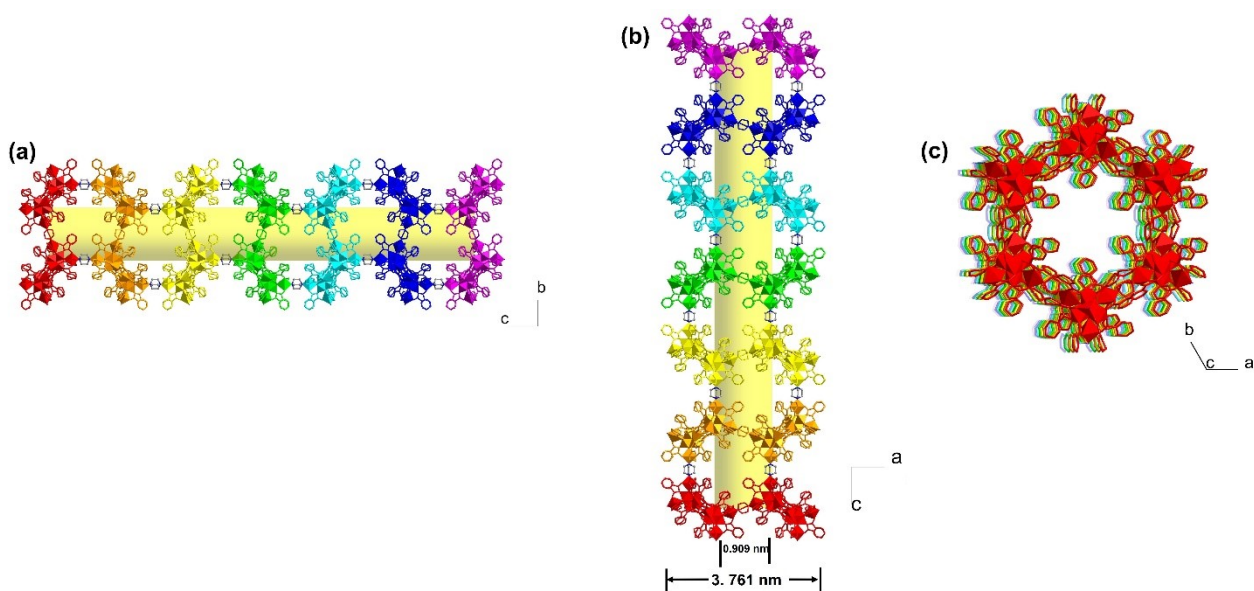

Fig. S29. The view of 1D nanotubes along the a axis (a), b axis (b) and c axis (c).

## 6. The mesoporous cavity in non-interpenetrated diamond (*dia*) frameworks.

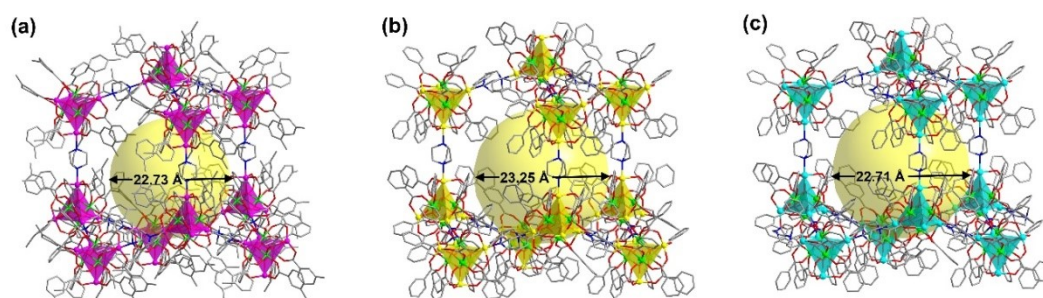

Fig. S30. The diamond (*dia*) cavity in AIOC-109 (a), AIOC-110 (b) and AIOC-111 (c).

## 7. The N<sub>2</sub> and CO<sub>2</sub> sorption isotherms of AIOC-99, AIOC-109 and AIOC-112.

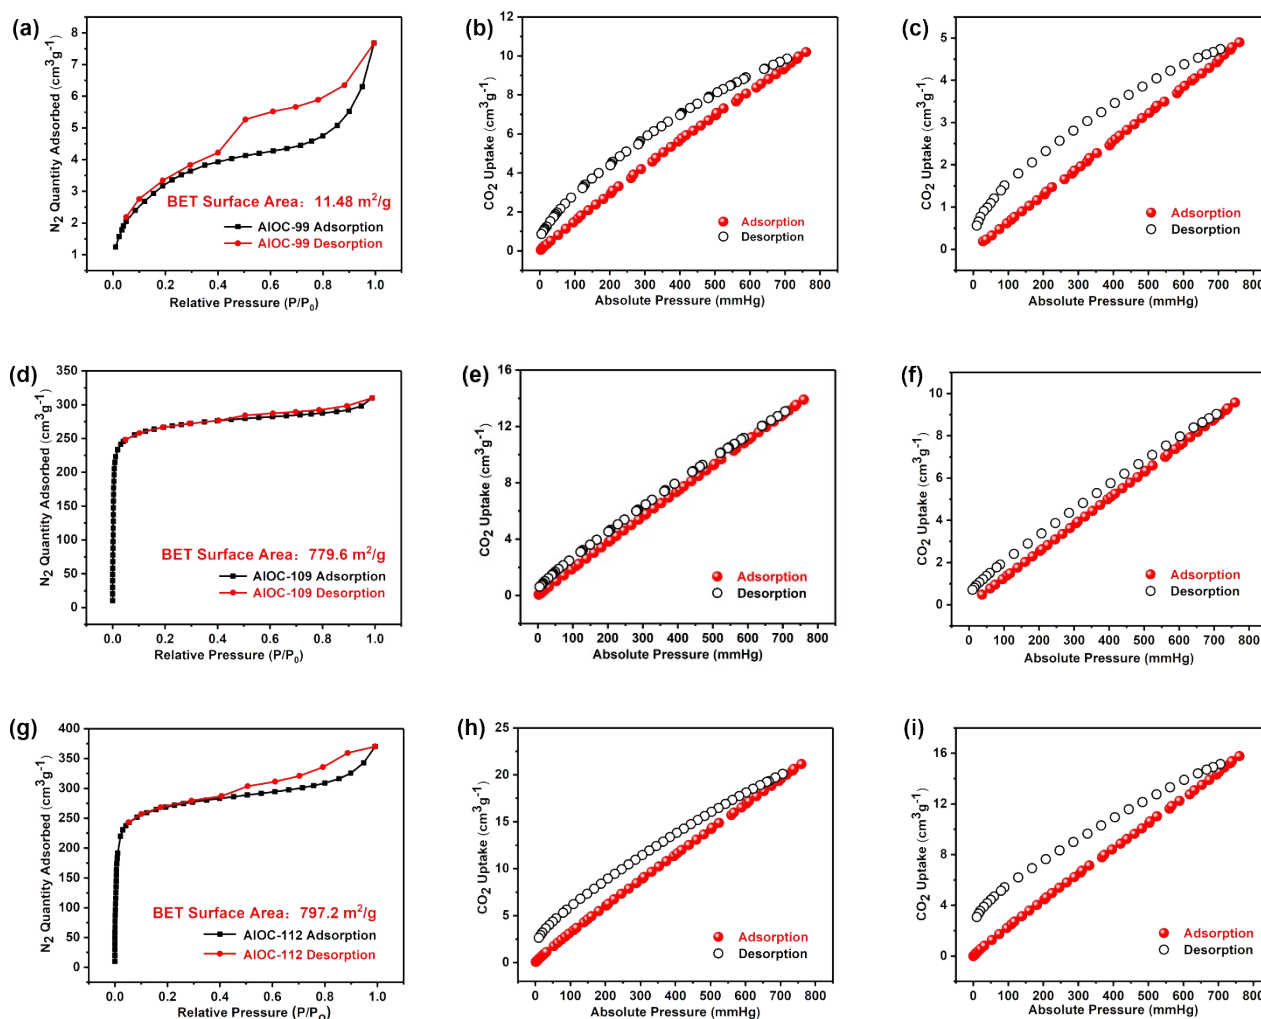

**Fig. S31.** (a) N<sub>2</sub> sorption isotherms of **AIOC-99** at 77K; (b) CO<sub>2</sub> sorption isotherms of **AIOC-99** at 273K; (c) CO<sub>2</sub> sorption isotherms of **AIOC-99** at 298K; (d) N<sub>2</sub> sorption isotherms of **AIOC-109** at 77K; (e) CO<sub>2</sub> sorption isotherms of **AIOC-109** at 273K; (f) CO<sub>2</sub> sorption isotherms of **AIOC-109** at 298K; (g) N<sub>2</sub> sorption isotherms of **AIOC-112** at 77K; (h) CO<sub>2</sub> sorption isotherms of **AIOC-112** at 273K; (i) CO<sub>2</sub> sorption isotherms of **AIOC-112** at 298K.

## 8. The stabilities and hydrophobic properties of AIOC-99, AIOC-109 and AIOC-112.

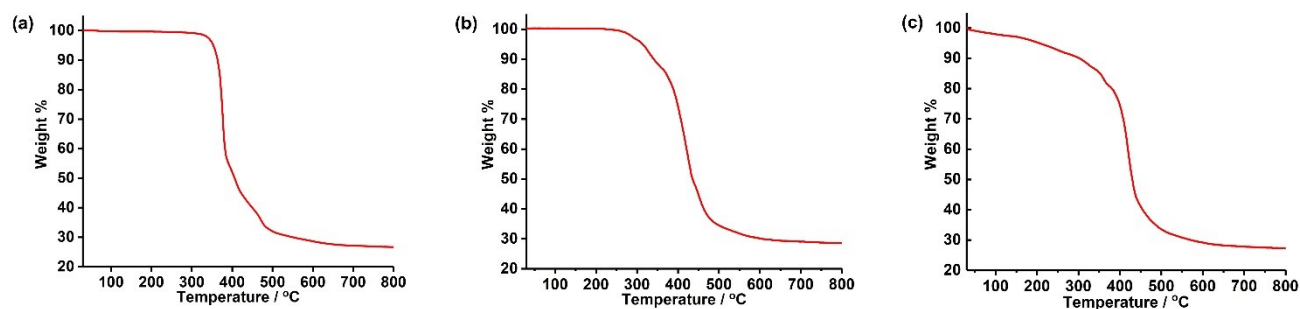

Fig. S32. The TGA curves of AIOC-99 (a), AIOC-109 (b) and AIOC-112 (c) measured in  $N_2/O_2$  from room temperature to 800 °C.

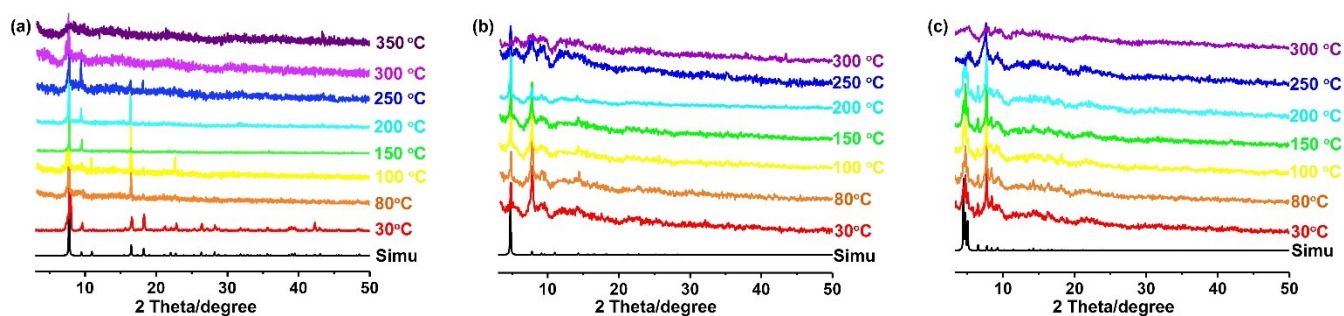

Fig. S33. In-situ temperature-dependent PXRD patterns for AIOC-99 (a), AIOC-109 (b) and AIOC-112 (c).

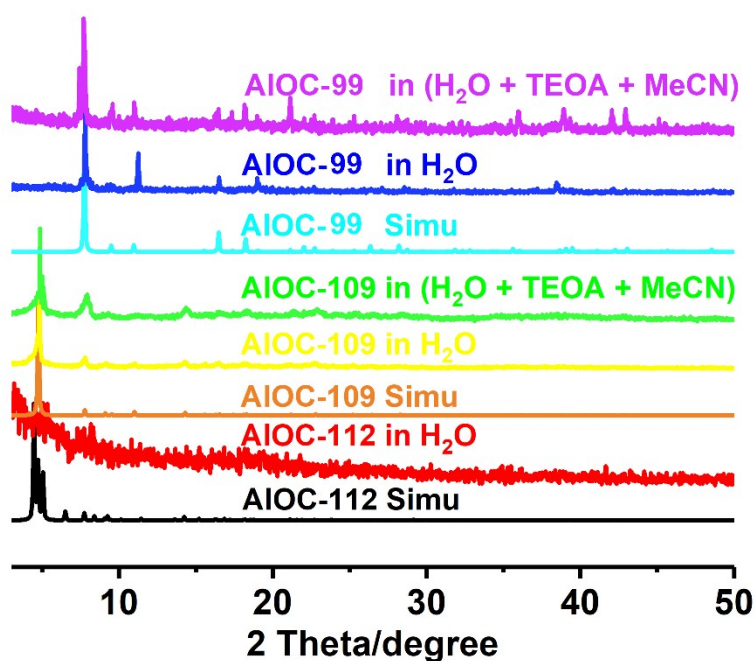

Fig. S34. The PXRD patterns of AIOC-99, AIOC-109 and AIOC-112 after immersing in  $H_2O$  or TEOA solution.

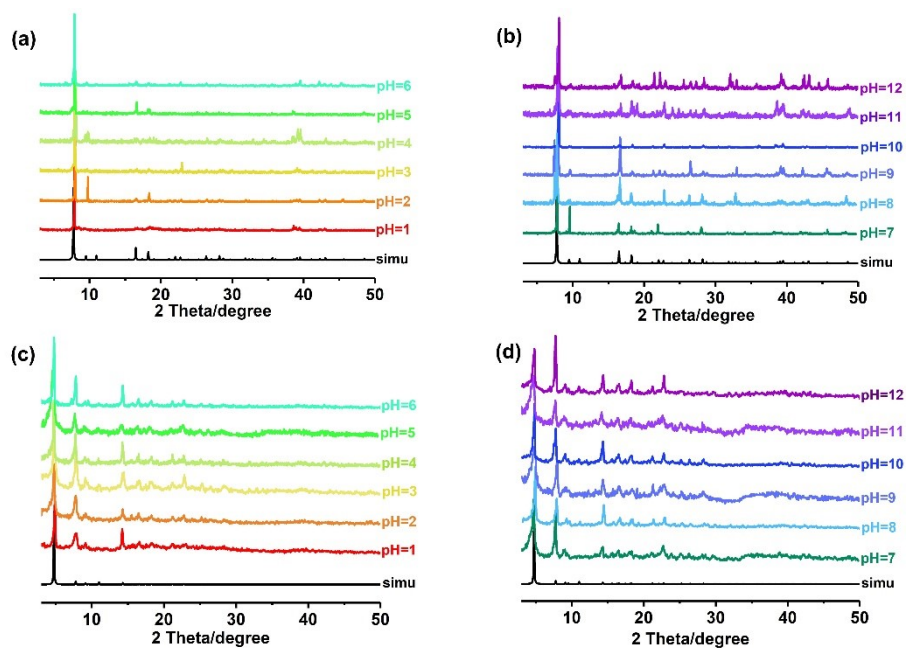

**Fig. S35.** The PXR D patterns of **AIOC-99** (a and b) and **AIOC-109** (c and d) after soaking in aqueous solution with different pH value for 24h.

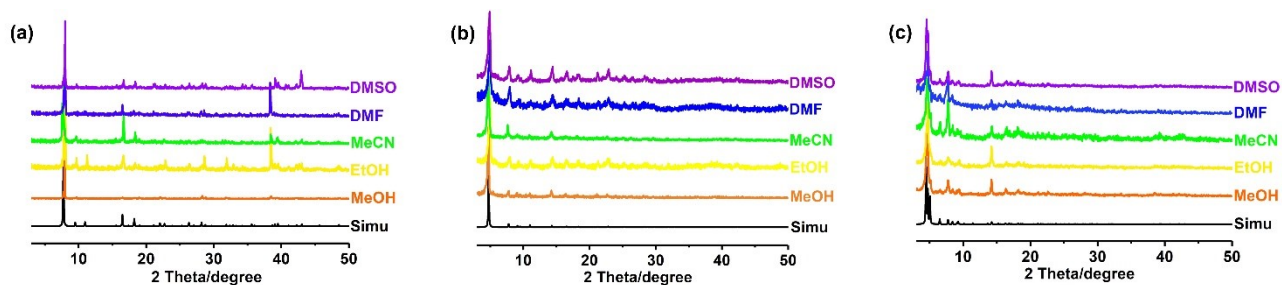

**Fig. S36.** The PXR D patterns of **AIOC-99** (a), **AIOC-109** (b) and **AIOC-112** (c) after soaking in different organic solvents at room temperature for 24h.

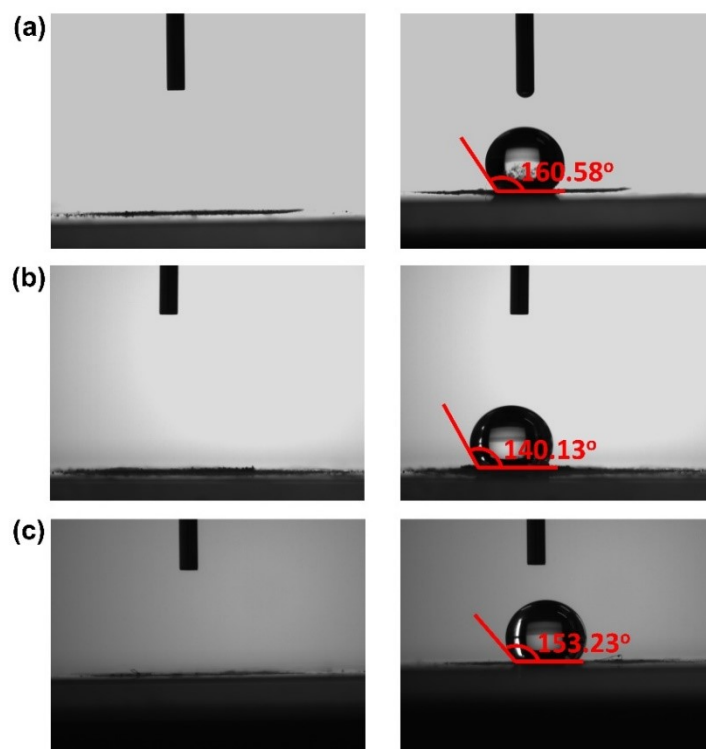

**Fig. S37.** The contact angle measurements of **AIOC-99** (a), **AIOC-109** (b) and **AIOC-112** (c).

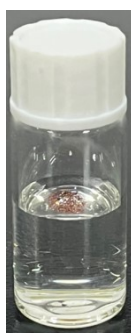

**Fig. S38.** The digital photo of **AIOC-99** floating on the water. Although the density of **AIOC-99** is large than water, the crystals can still float on surface of water indicating there are strong surface tension and interface hydrophobic.



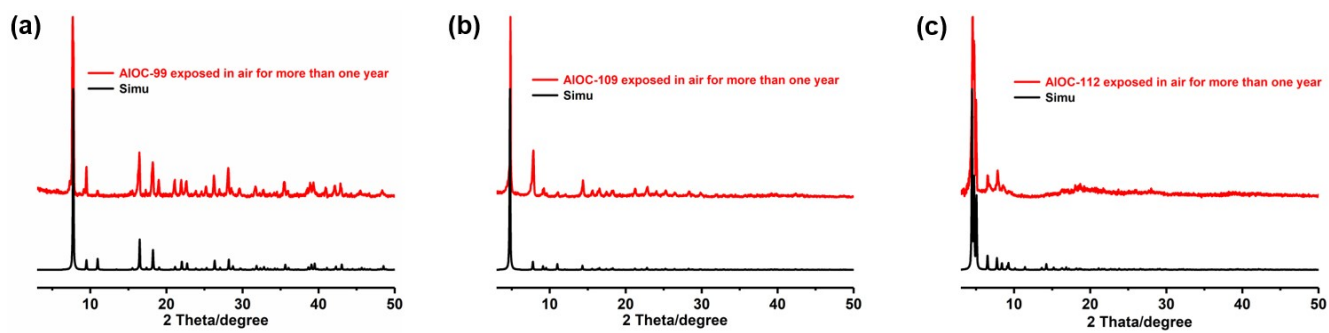

**Fig. S39.** The PXRD patterns of AIOC-99, AIOC-109 and AIOC-112 after exposed in air for more than one year.

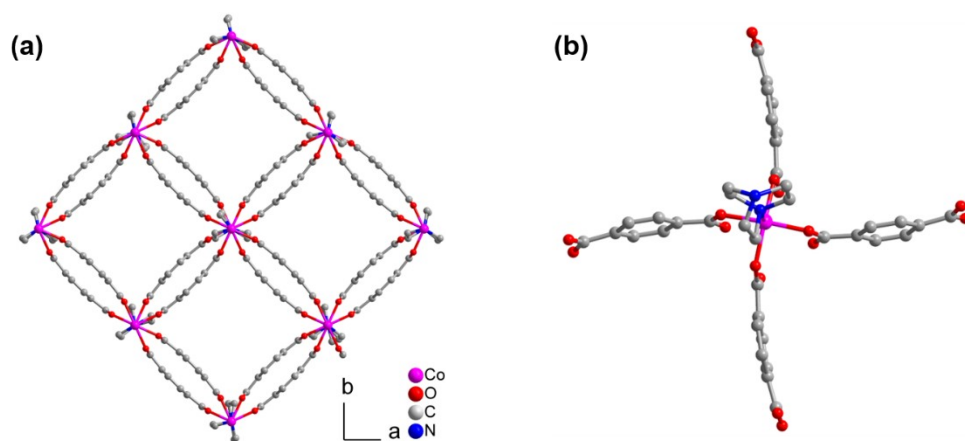

**Fig. S40.** The structure of  $\text{Co}_2\text{Bdc}_2\text{Dabco}$  (a) reported in literature and the coordination environment of Co in  $\text{Co}_2\text{Bdc}_2\text{Dabco}$  (b).

## 9. PXRD analyses.

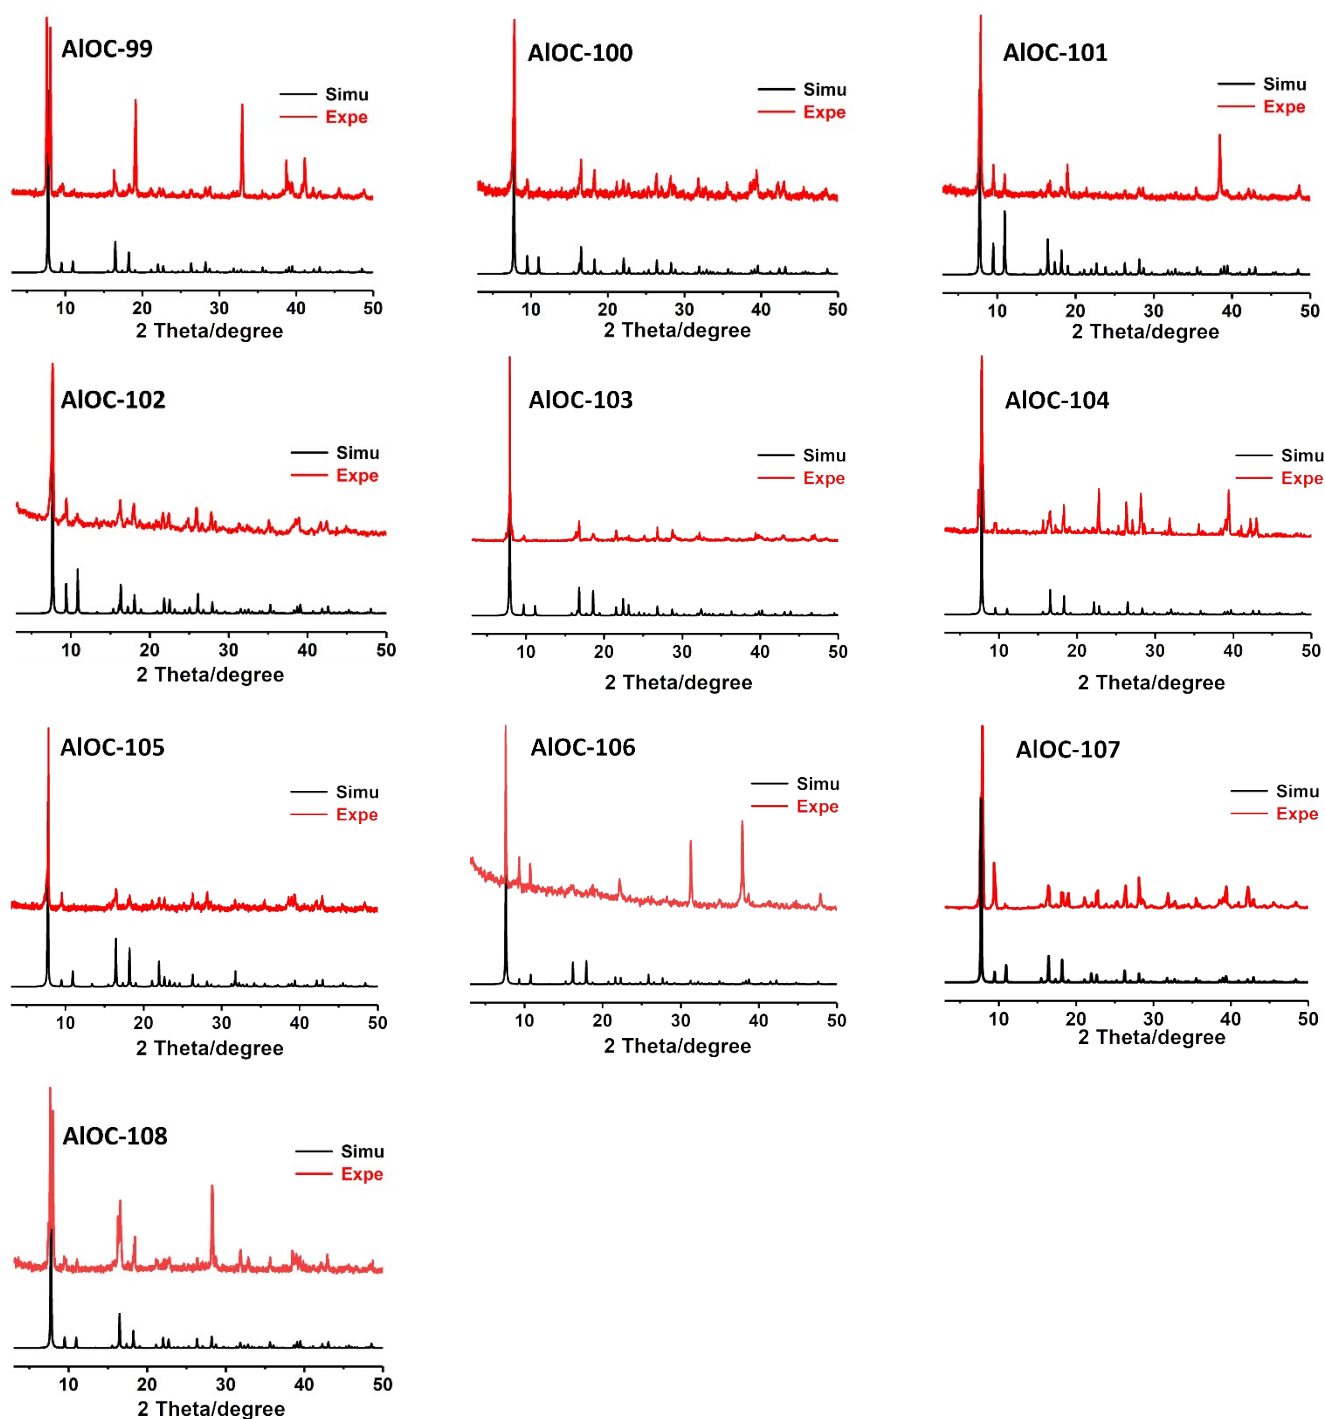

Fig. S41. The PXRD patterns of two-fold interpenetrated diamond (*dia*) frameworks (simulated, black; experimental, red).

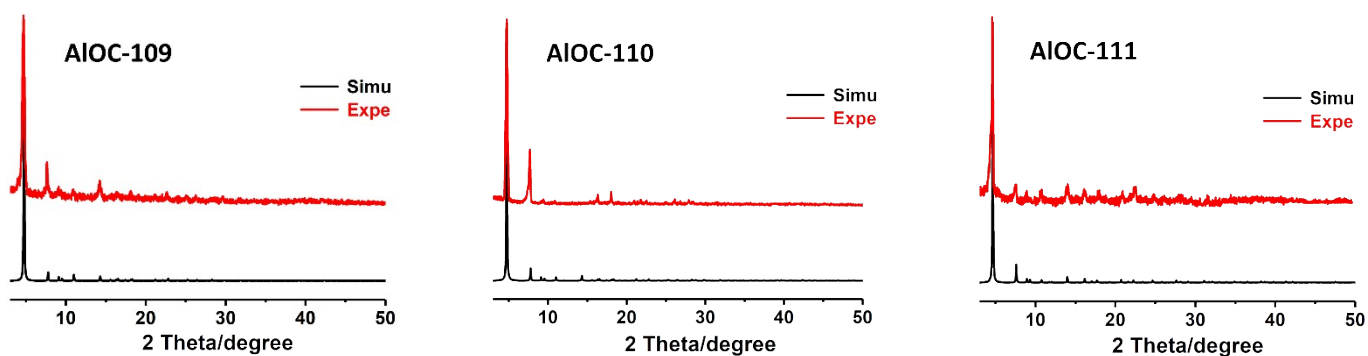

Fig. S42. The PXR D patterns of non-interpenetrated diamond (*dia*) frameworks (simulated, black; experimental, red).

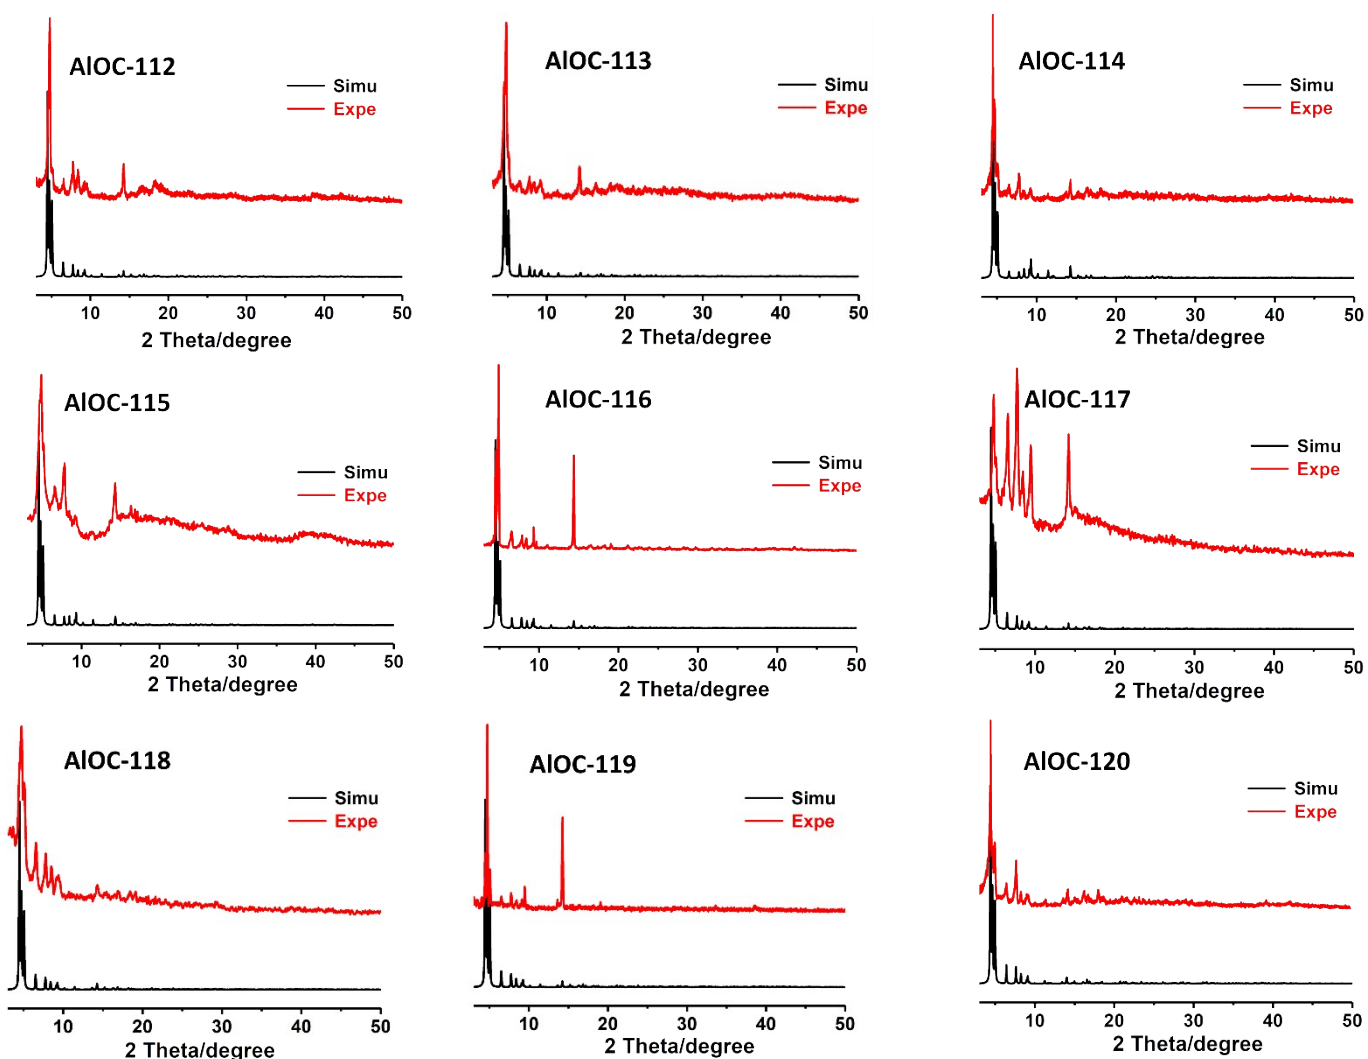

Fig. S43. The PXR D patterns of non-interpenetrated lonsdaleite (*lon*) frameworks (simulated, black; experimental, red).

*Discussion for PXR D patterns:*

The experimental PXR D patterns for **AIOC-99** to **AIOC-120** are consistent with the simulated ones from single-crystal X-ray diffraction, which indicates that the samples are pure (Fig. S41–S43). The differences in intensity between the experimental and simulated patterns might be due to the variation in crystal orientation for power samples.

## 10. FT-IR spectra.

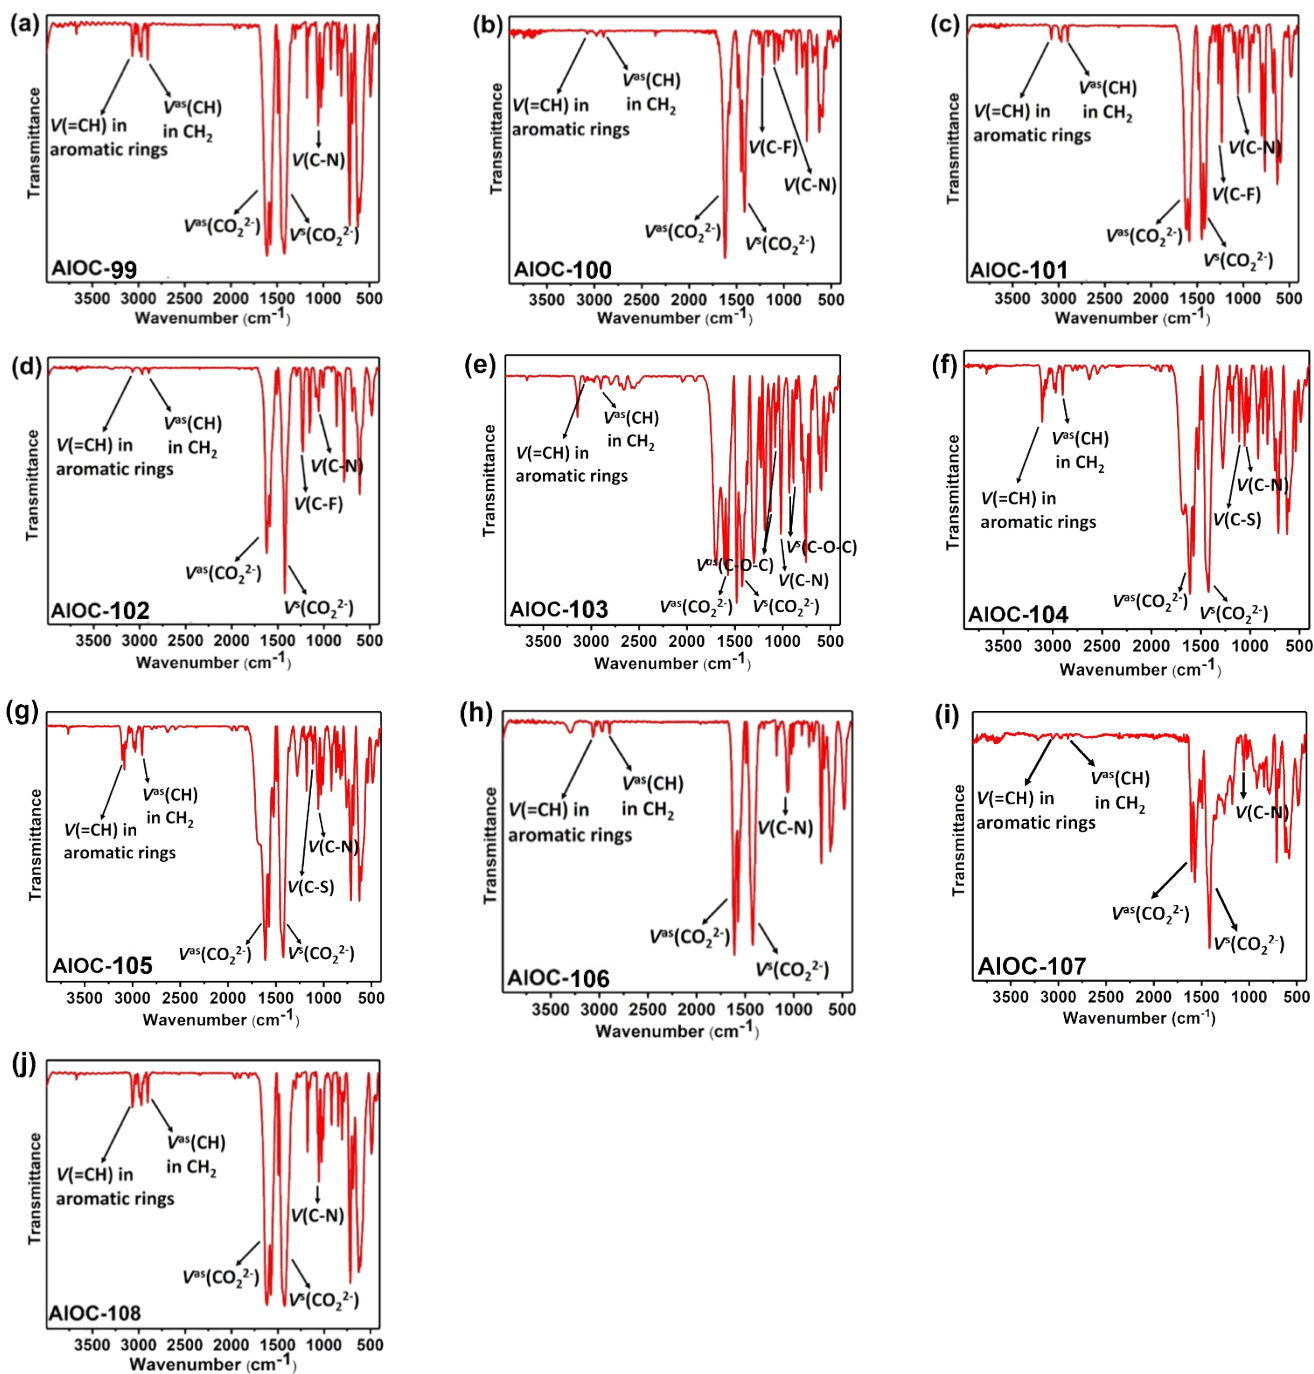

Fig. S44. The IR spectra of two-fold interpenetrated diamond (*dia*) frameworks.

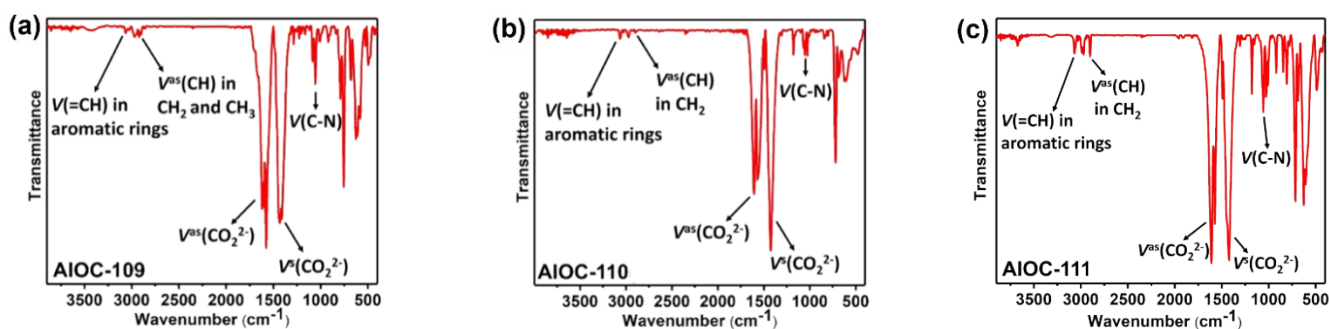

Fig. S45. The IR spectra of non-interpenetrated diamond (*dia*) frameworks.

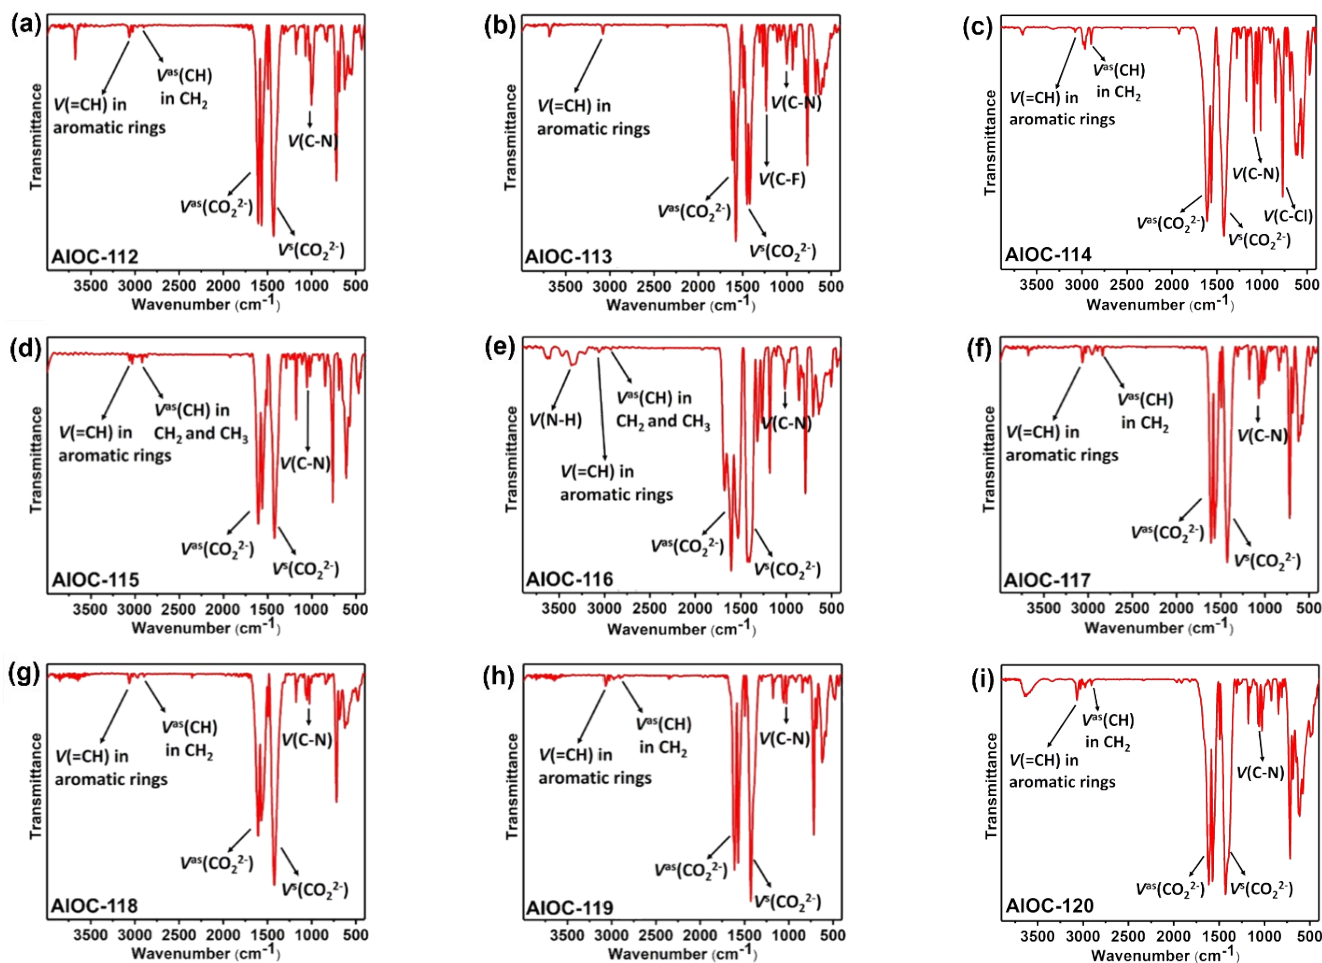

Fig. S46. The IR spectra of non-interpenetrated lonsdaleite (*lon*) frameworks.

#### Discussion for IR spectra:

The IR spectra have been recorded in the range of 3900–400  $\text{cm}^{-1}$  from solid samples palletized with KBr, which are presented in Fig. S44–S46. In the high wavenumber region ( $\nu > 1000 \text{ cm}^{-1}$ ), the weak absorption bands at 3097–3060  $\text{cm}^{-1}$ , 2920–2893  $\text{cm}^{-1}$  can be ascribed to the stretching vibration modes of C–H bonds in aromatic rings, methylene or methyl groups. The characteristic stretching vibrations  $\nu(\text{CO}_2^{2-})$  of in carboxylic groups and  $\nu(\text{C}=\text{C})$  in benzene rings are overlapped from 1622  $\text{cm}^{-1}$  to 1407  $\text{cm}^{-1}$ . Among them, the asymmetric stretching vibration ( $\nu_{\text{as}}$ ) and symmetric stretching vibration ( $\nu_{\text{s}}$ ) of the carboxylate group can be clearly attributed, namely, the band at 1622–1566  $\text{cm}^{-1}$  is assigned to the  $\nu_{\text{as}}(\text{CO}_2^{2-})$  whilst the signal at 1448–1407  $\text{cm}^{-1}$  is ascribed to the  $\nu_{\text{s}}(\text{CO}_2^{2-})$ . Besides, the intense absorption peaks appearing at 1099–1001  $\text{cm}^{-1}$  are assigned to the stretching vibrations of  $\nu(\text{C}-\text{N})$  from DABCO. In the low wavenumber region ( $\nu < 1000 \text{ cm}^{-1}$ ), the absorptions in the region ca. 900–650  $\text{cm}^{-1}$  for AIOC-99 to AIOC-120 can be attributed to the C–H in-plane or out-of-plane bends, ring breathing, and ring deformation absorptions of benzoates.

## 11. The EDS spectra.

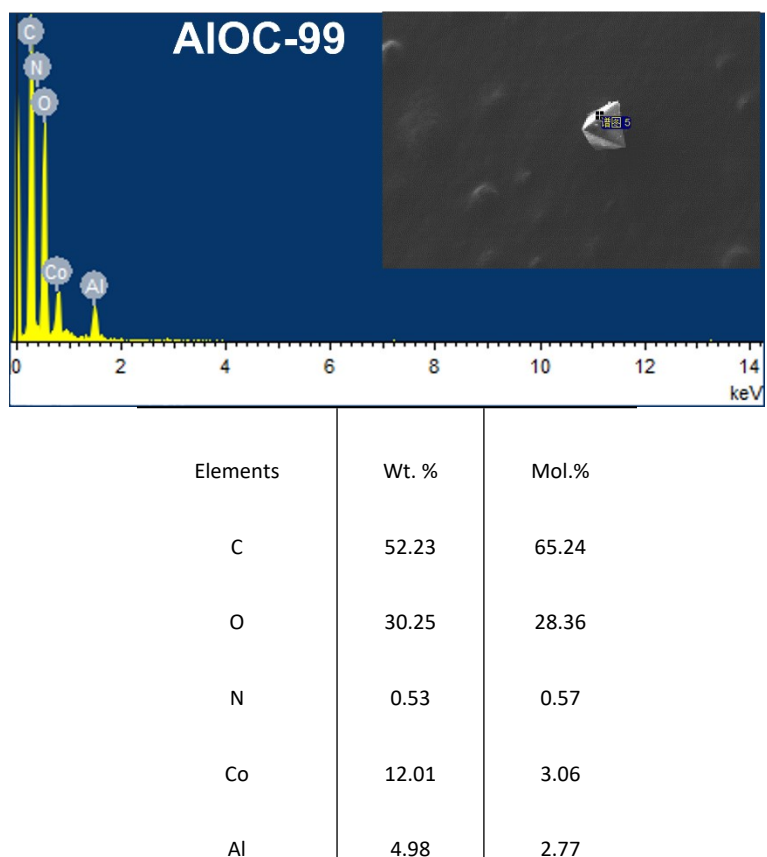

**Fig. S47.** The EDS spectrum and quantitative analysis of **AIOC-99**.

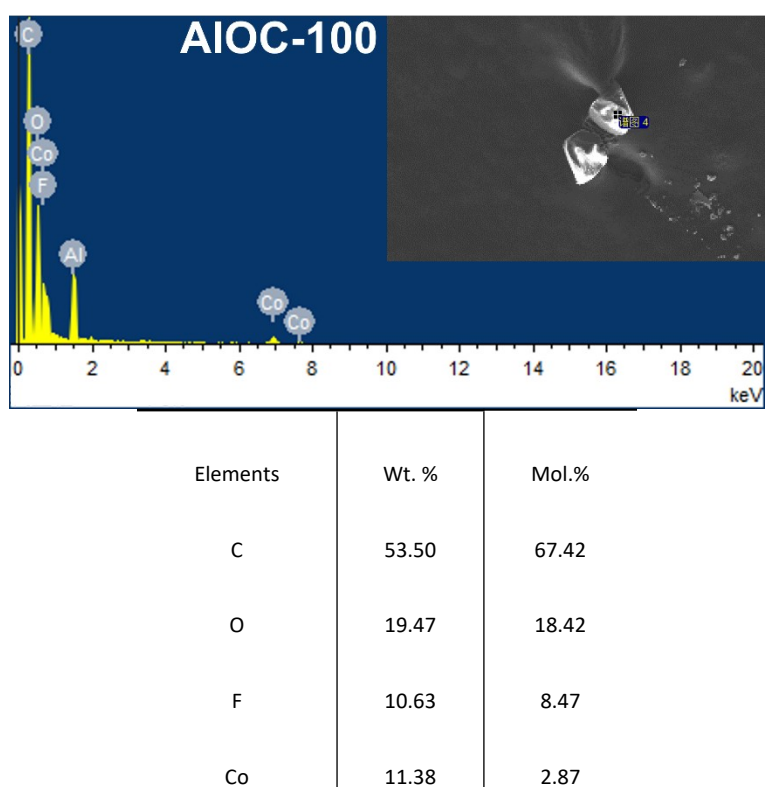

|    |      |      |
|----|------|------|
| Al | 5.02 | 2.82 |
|----|------|------|

Fig. S48. The EDS spectrum and quantitative analysis of AIOC-100.

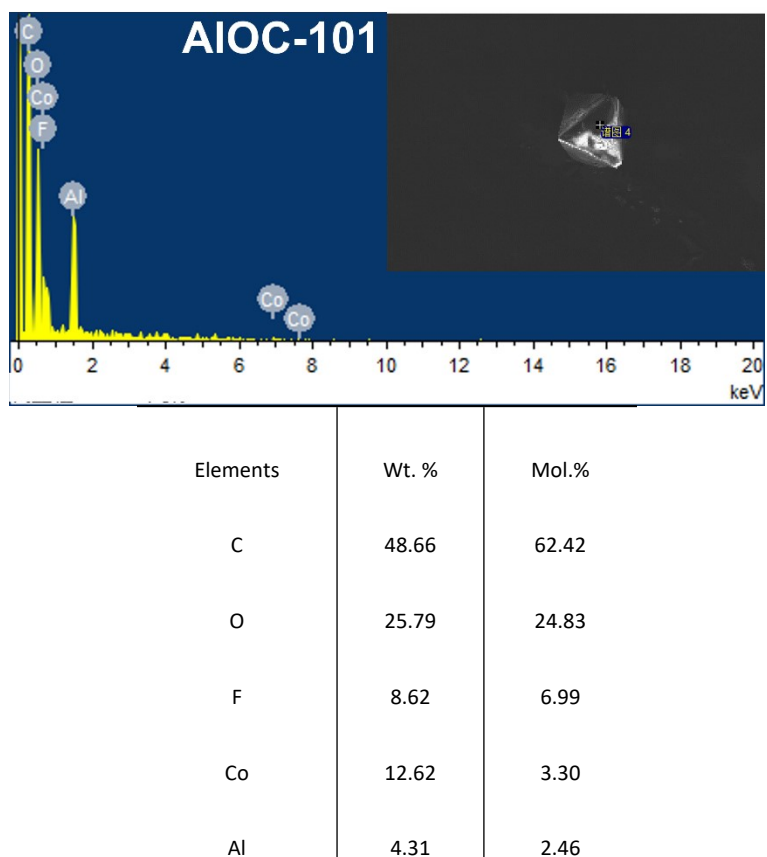

Fig. S49. The EDS spectrum and quantitative analysis of AIOC-101.

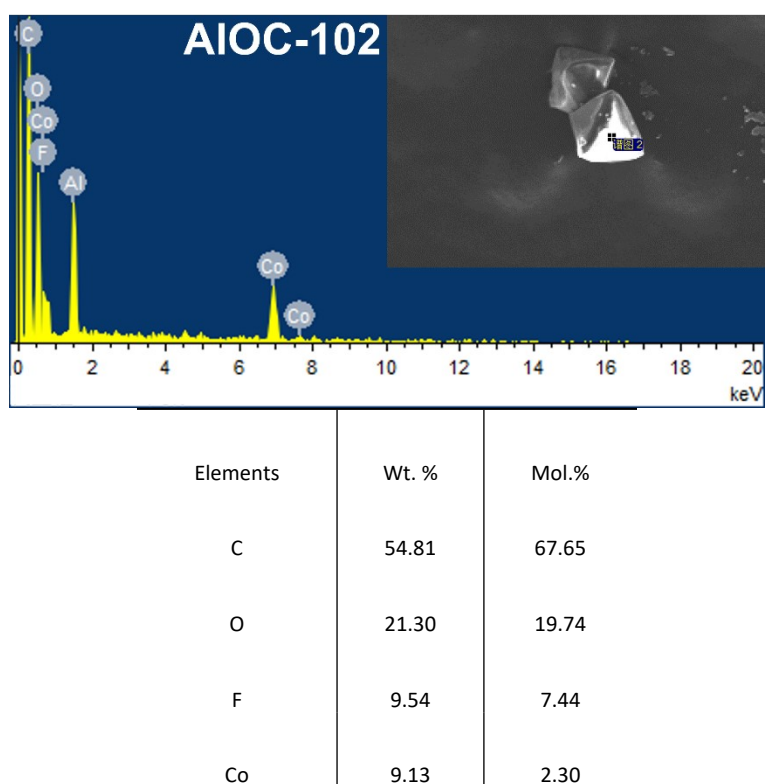

|    |      |      |
|----|------|------|
| Al | 5.22 | 2.87 |
|----|------|------|

Fig. S50. The EDS spectrum and quantitative analysis of AIOC-102.

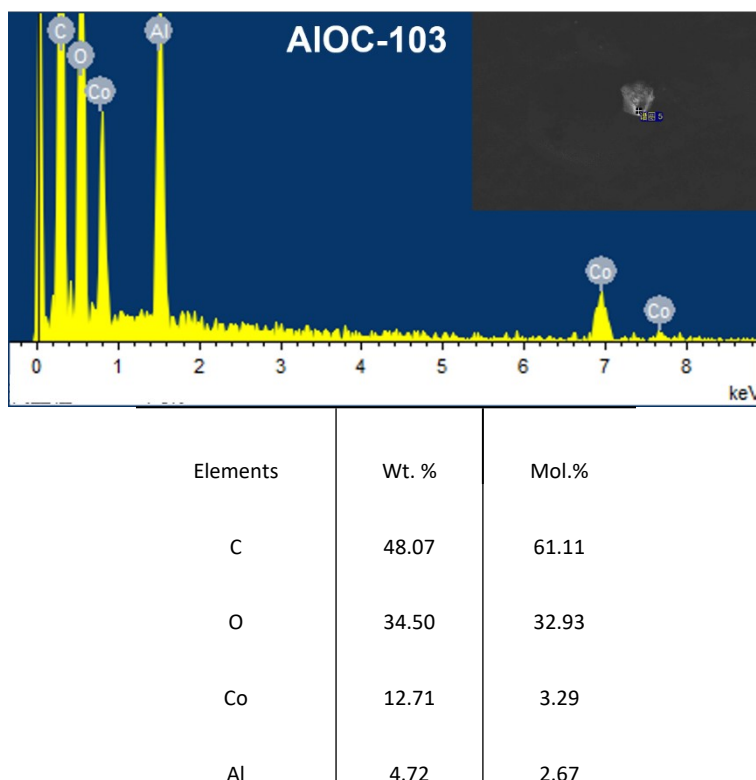

Fig. S51. The EDS spectrum and quantitative analysis of AIOC-103.

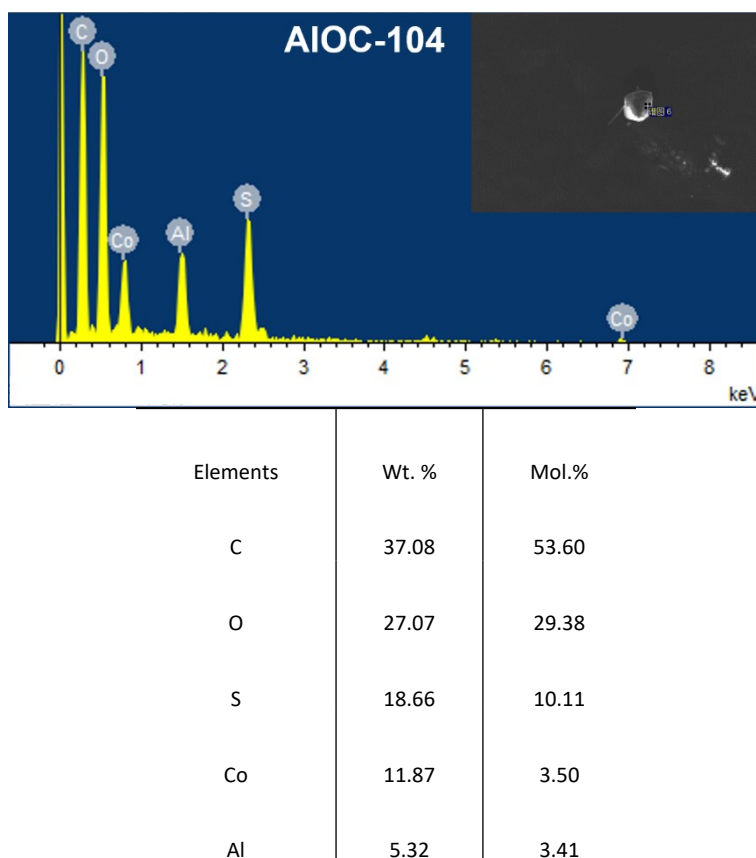

Fig. S52. The EDS spectrum and quantitative analysis of AIOC-104.



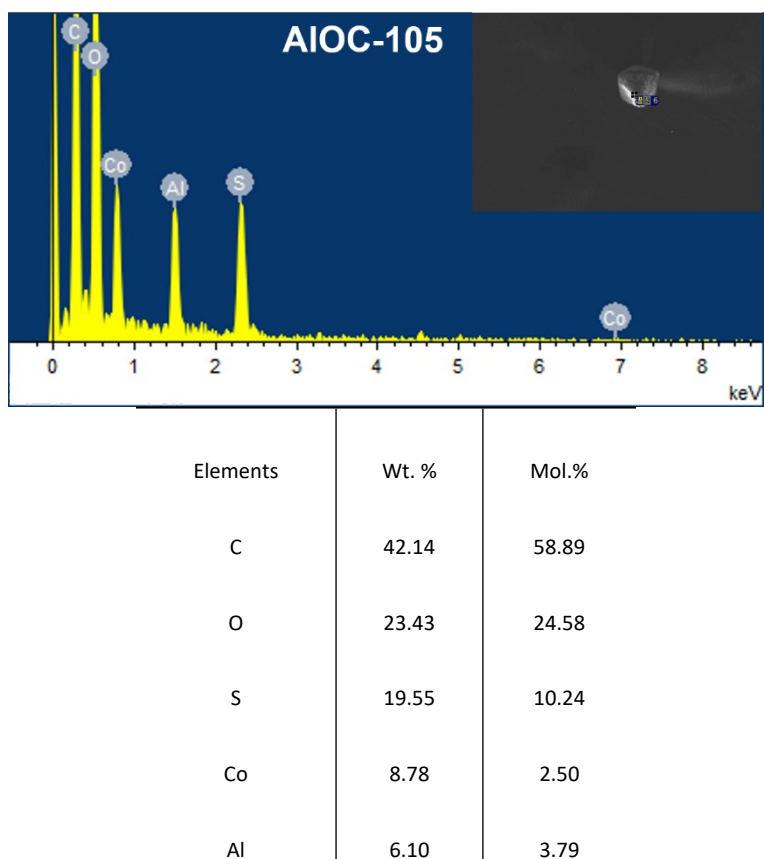

Fig. S53. The EDS spectrum and quantitative analysis of AIOC-105.

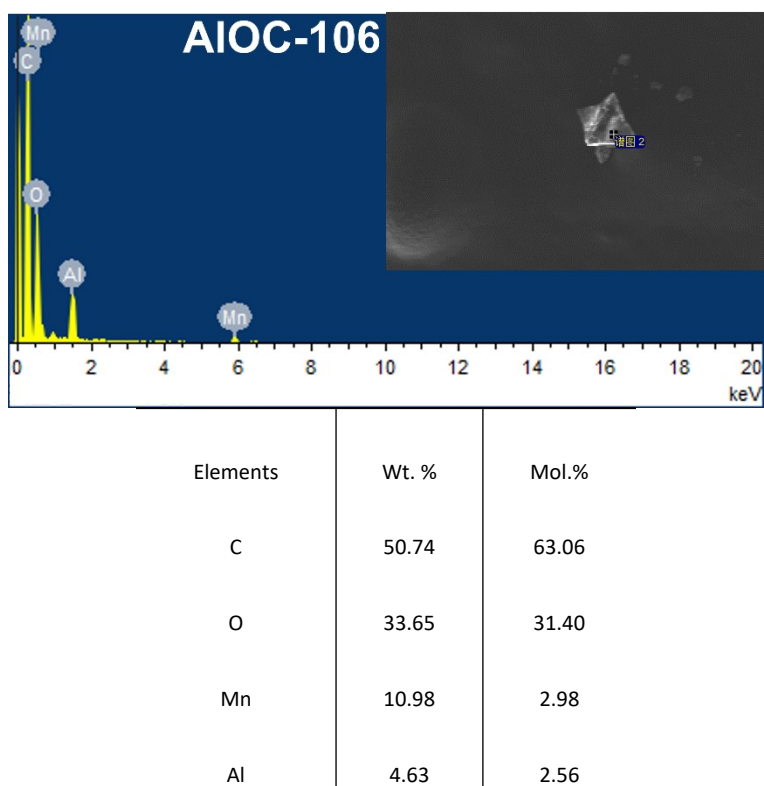

Fig. S54. The EDS spectrum and quantitative analysis of AIOC-106.

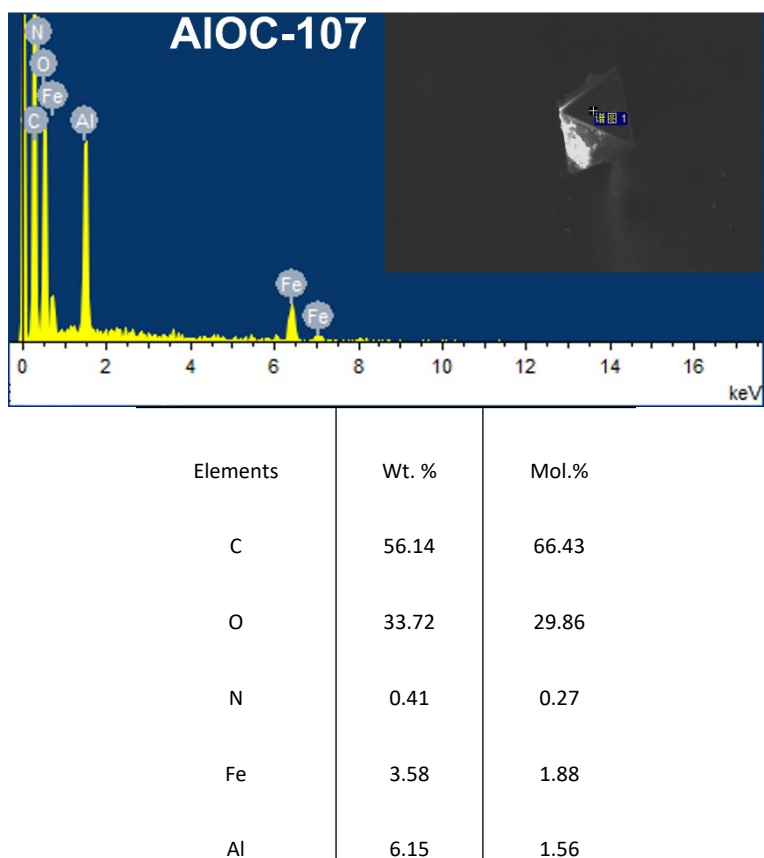

Fig. S55. The EDS spectrum and quantitative analysis of **AIOC-107**.

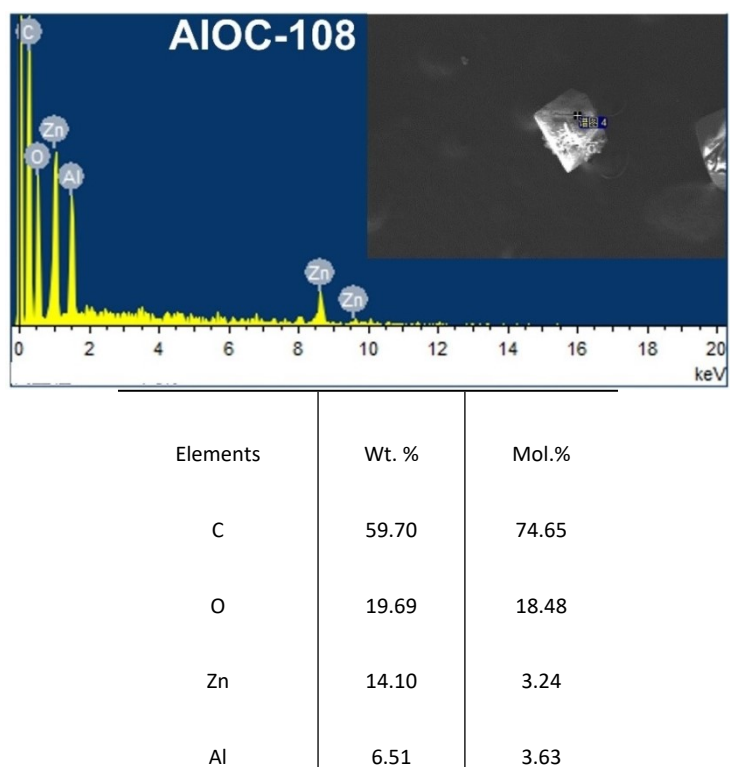

Fig. S56. The EDS spectrum and quantitative analysis of **AIOC-108**.

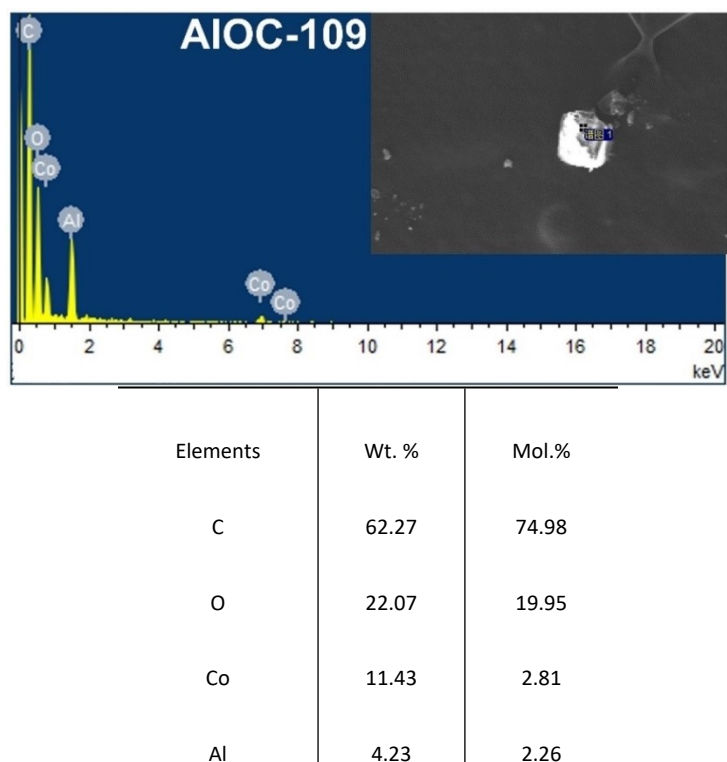

Fig. S57. The EDS spectrum and quantitative analysis of AIOC-109.

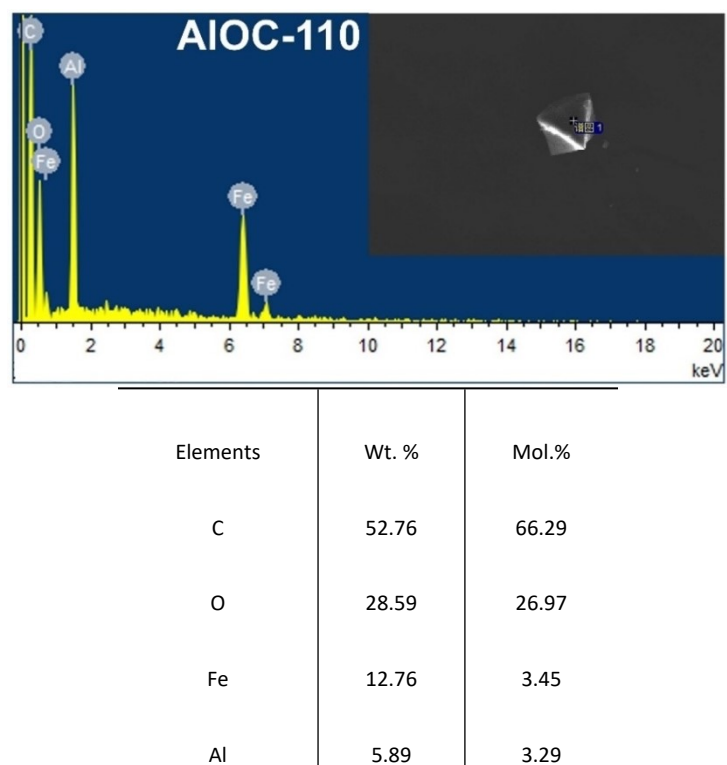

Fig. S58. The EDS spectrum and quantitative analysis of AIOC-110.

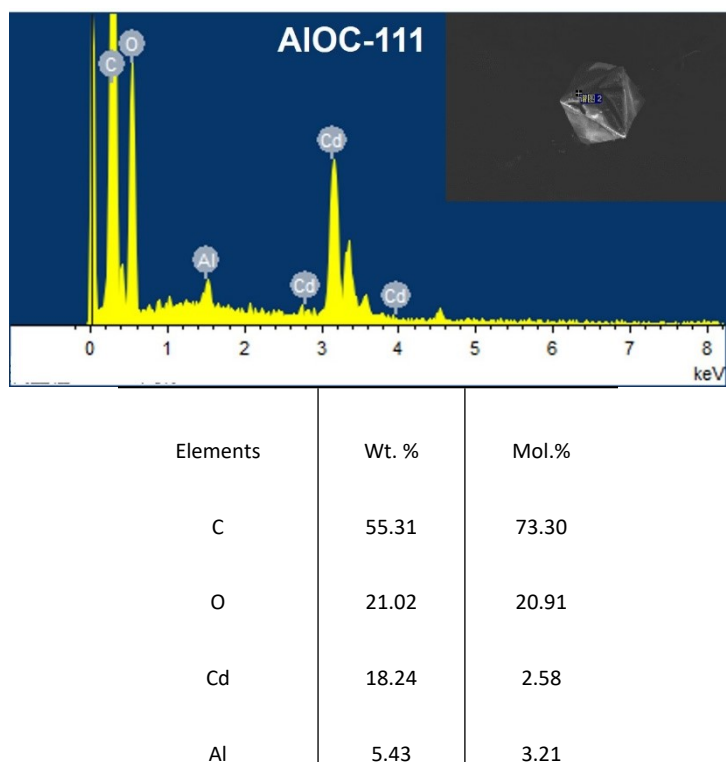

**Fig. S59.** The EDS spectrum and quantitative analysis of **AIOC-111**.

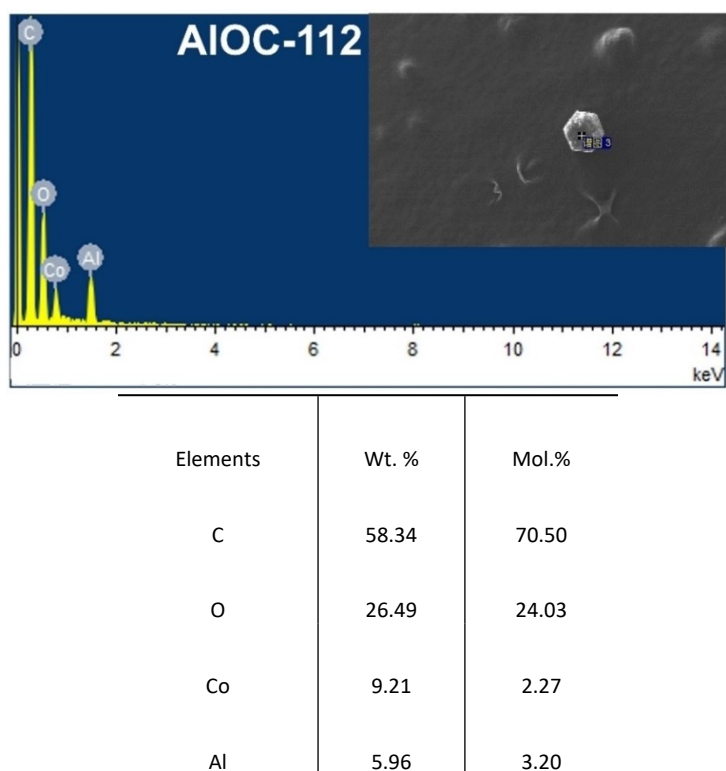

**Fig. S60.** The EDS spectrum and quantitative analysis of **AIOC-112**.

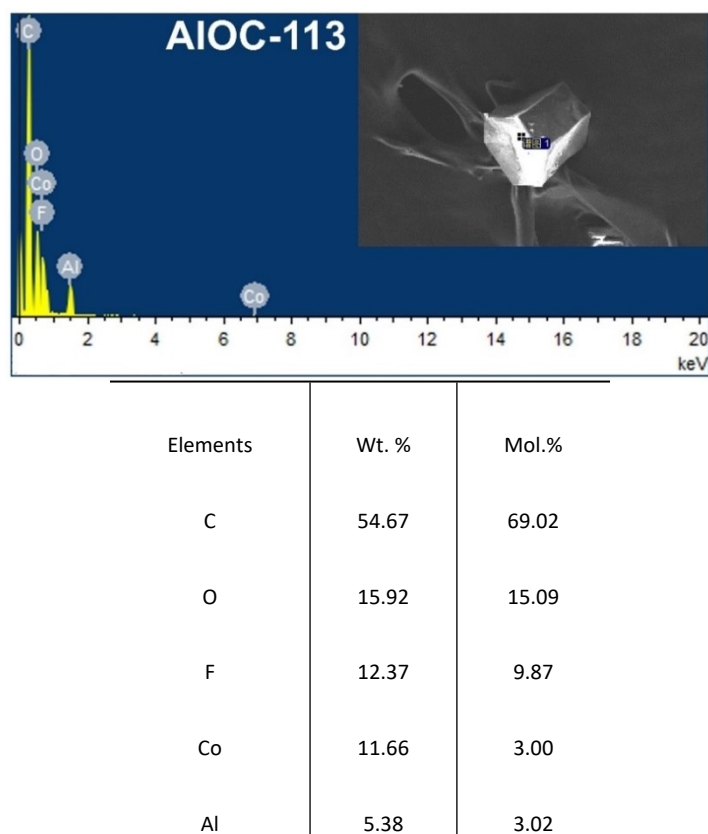

**Fig. S61.** The EDS spectrum and quantitative analysis of **AIOC-113**.

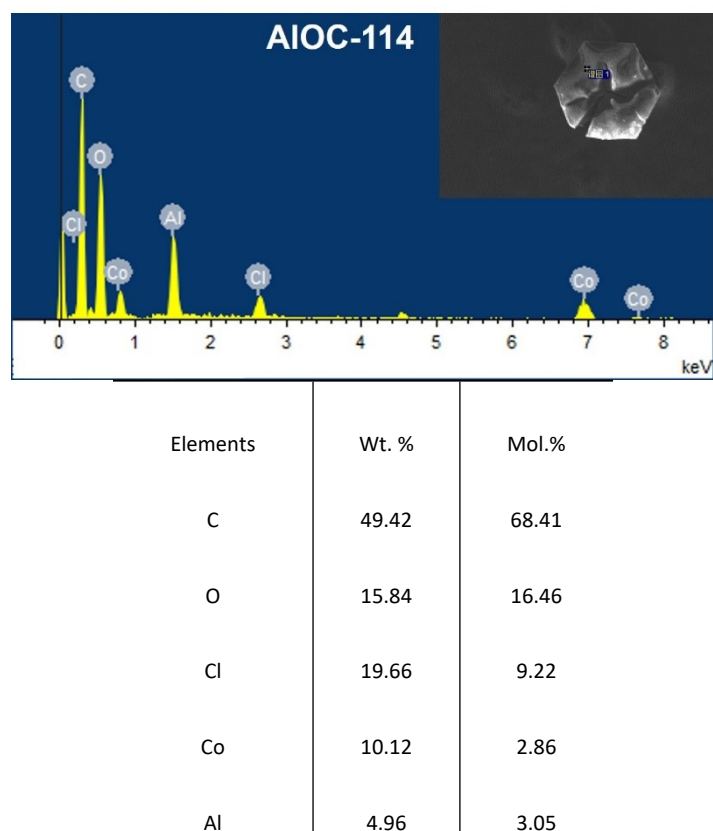

**Fig. S62.** The EDS spectrum and quantitative analysis of **AIOC-114**.

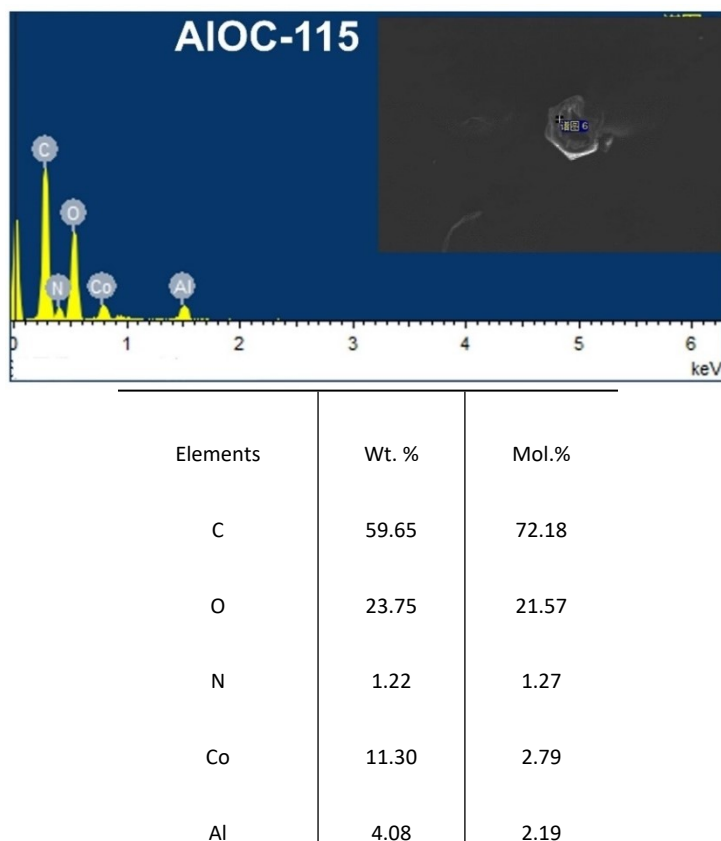

**Fig. S63.** The EDS spectrum and quantitative analysis of **AIOC-115**.

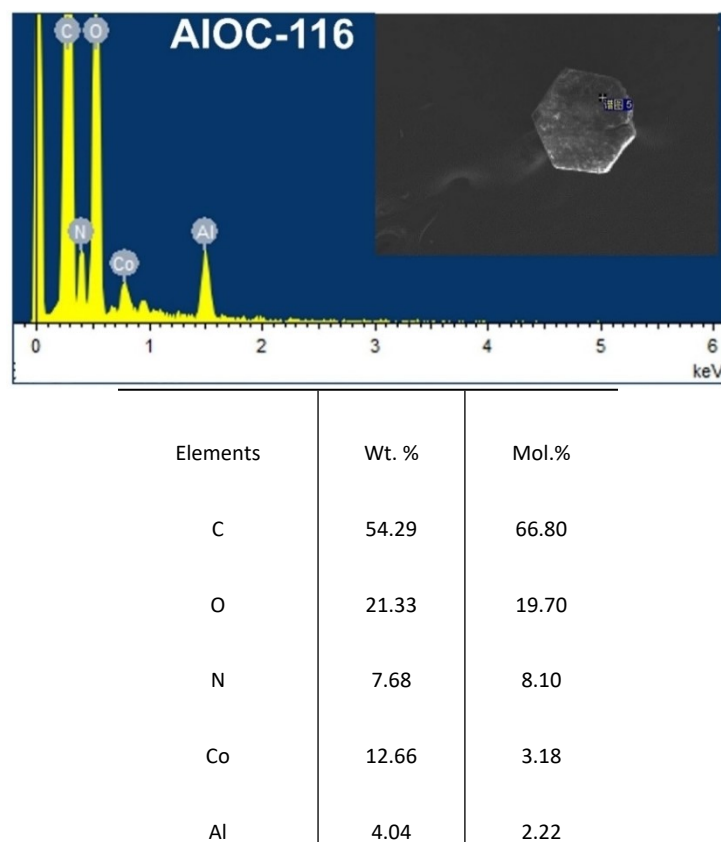

**Fig. S64.** The EDS spectrum and quantitative analysis of **AIOC-116**.

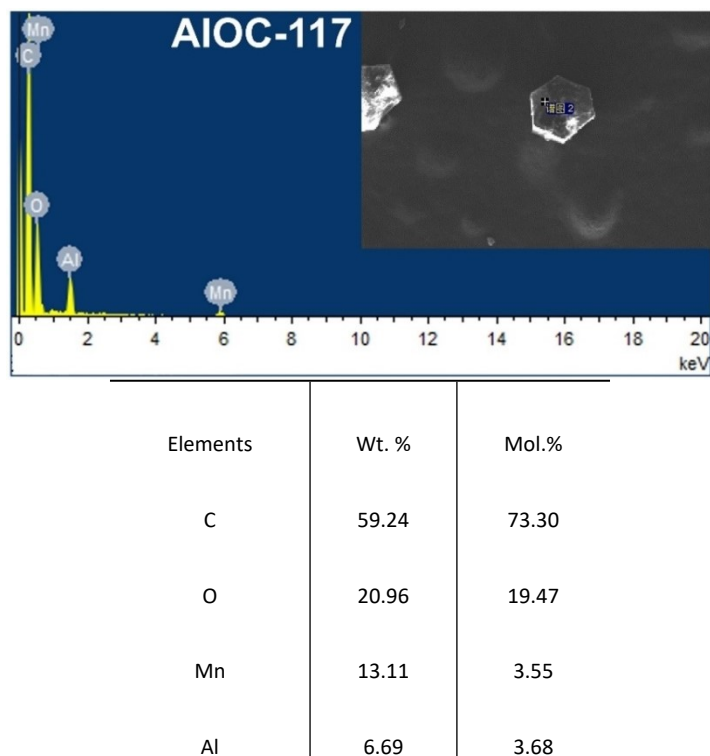

**Fig. S65.** The EDS spectrum and quantitative analysis of **AIOC-117**.

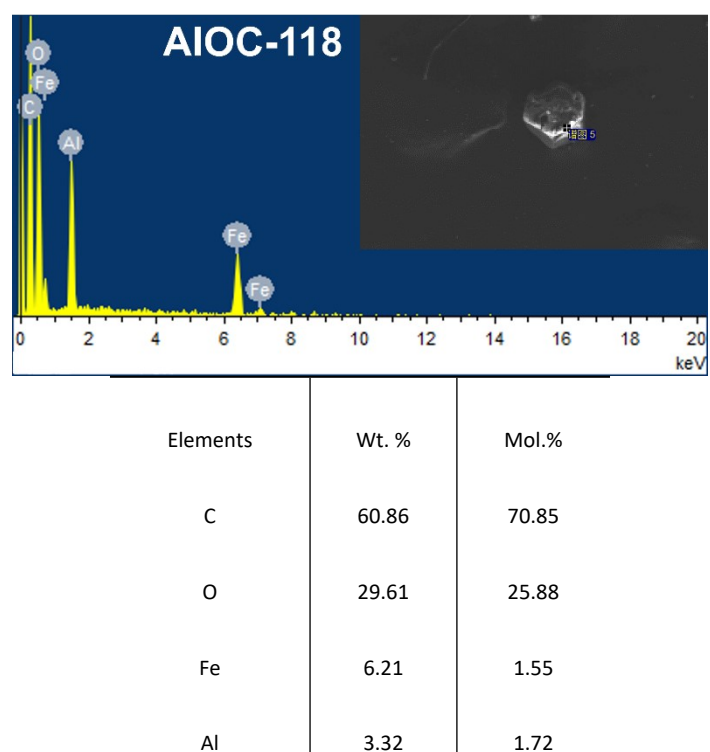

**Fig. S66.** The EDS spectrum and quantitative analysis of **AIOC-118**.

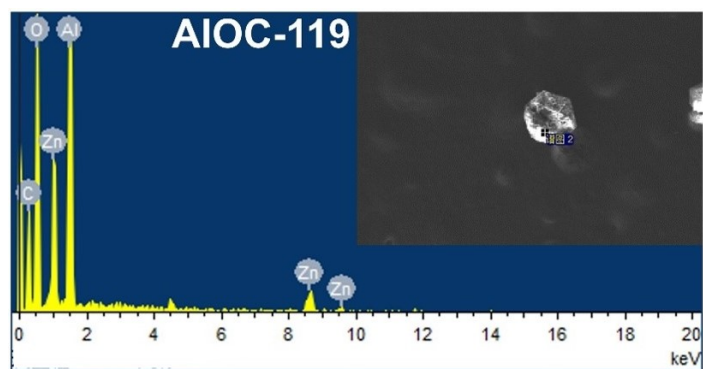

| Elements | Wt. % | Mol. % |
|----------|-------|--------|
| C        | 59.42 | 74.55  |
| O        | 19.69 | 18.55  |
| Zn       | 14.52 | 3.35   |
| Al       | 6.37  | 3.55   |

**Fig. S67.** The EDS spectrum and quantitative analysis of **AIOC-119**.

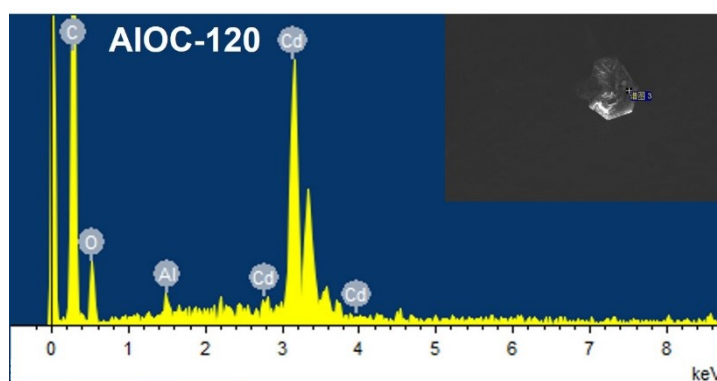

| Elements | Wt. % | Mol. % |
|----------|-------|--------|
| C        | 57.39 | 77.59  |
| O        | 15.40 | 15.63  |
| Cd       | 20.97 | 3.03   |
| Al       | 6.24  | 3.75   |

**Fig. S68.** The EDS spectrum and quantitative analysis of **AIOC-120**.

*Discussion for EDS spectra:*

The EDS spectra of **AIOC-99** to **AIOC-120** were used to confirm the existence of metal elements. Also, the quantification of metal elements was determined (Fig. S47–S68). The molar ratios between Al and M are approximately 1, which are consistent with the formula.



## 12. The XPS spectra.

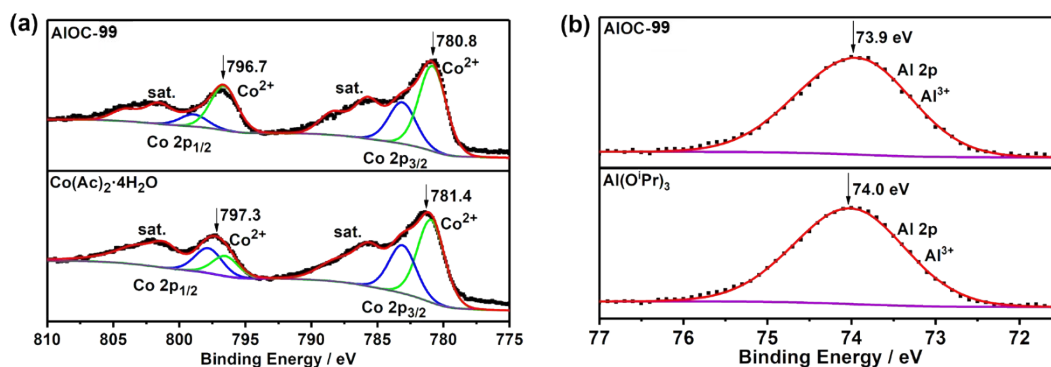

Fig. S69. The Co 2p and Al 2p XPS spectra of **AIOC-99**,  $\text{Co}(\text{Ac})_2 \cdot 4\text{H}_2\text{O}$  and  $\text{Al}(\text{O}^i\text{Pr})_3$ .

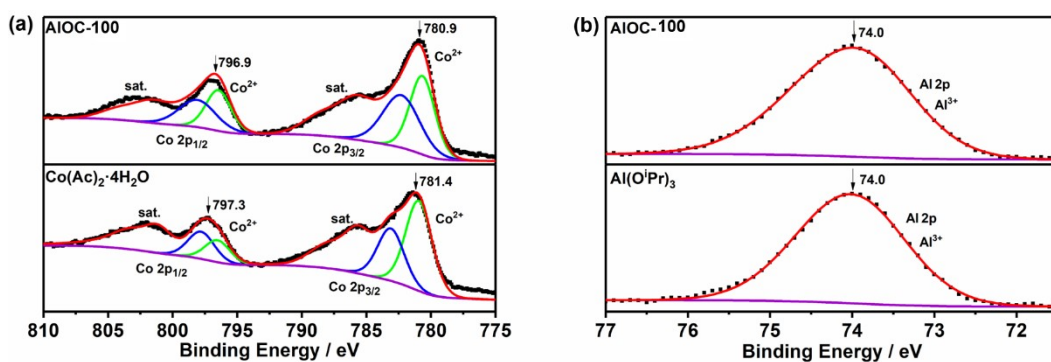

Fig. S70. The Co 2p and Al 2p XPS spectra of **AIOC-100**,  $\text{Co}(\text{Ac})_2 \cdot 4\text{H}_2\text{O}$  and  $\text{Al}(\text{O}^i\text{Pr})_3$ .

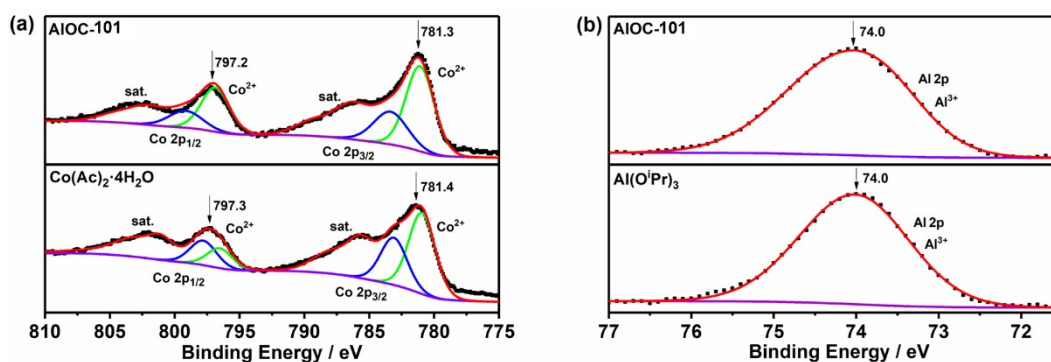

Fig. S71. The Co 2p and Al 2p XPS spectra of **AIOC-101**,  $\text{Co}(\text{Ac})_2 \cdot 4\text{H}_2\text{O}$  and  $\text{Al}(\text{O}^i\text{Pr})_3$ .

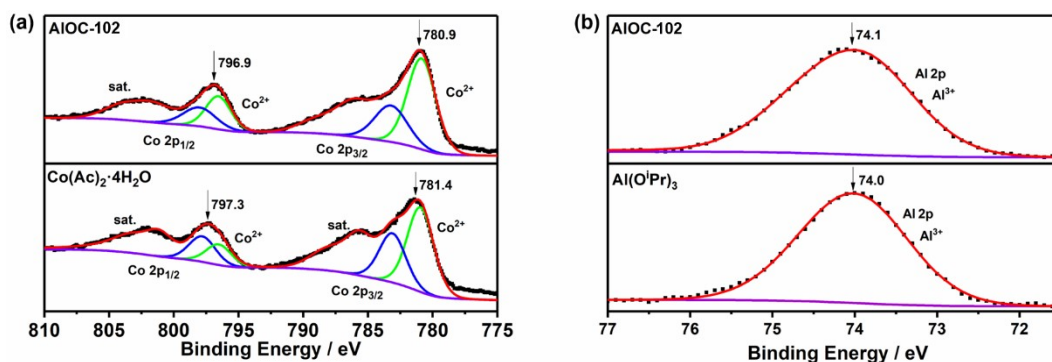

Fig. S72. The Co 2p and Al 2p XPS spectra of **AIOC-102**, Co(Ac)<sub>2</sub>·4H<sub>2</sub>O and Al(O<sup>i</sup>Pr)<sub>3</sub>.

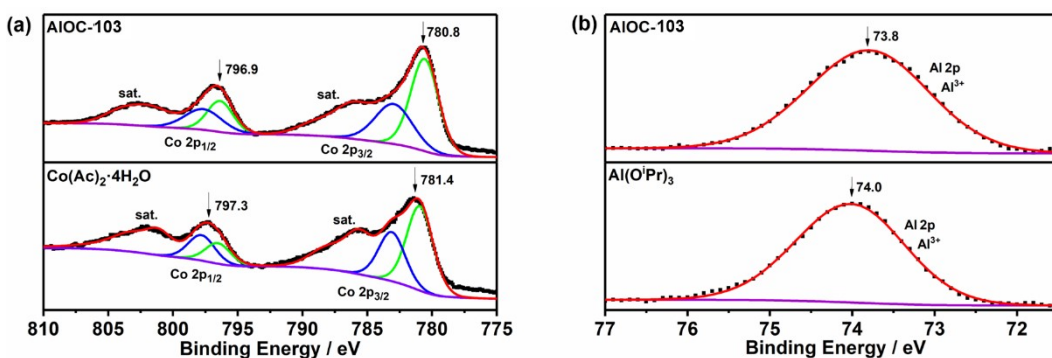

Fig. S73. The Co 2p and Al 2p XPS spectra of **AIOC-103**, Co(Ac)<sub>2</sub>·4H<sub>2</sub>O and Al(O<sup>i</sup>Pr)<sub>3</sub>.

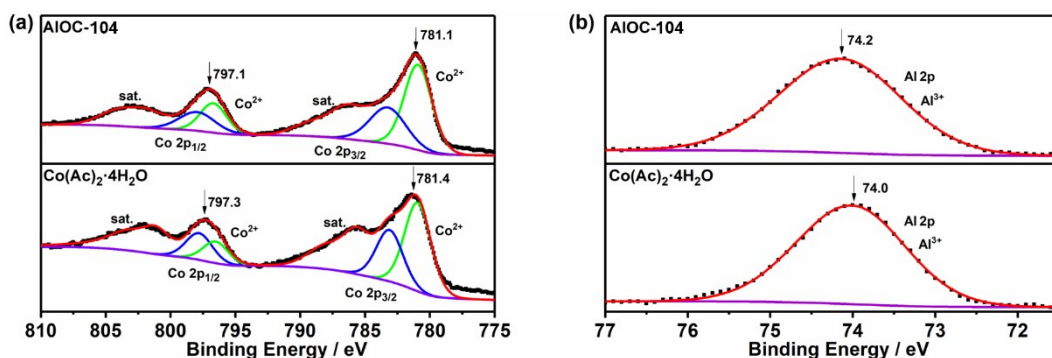

Fig. S74. The Co 2p and Al 2p XPS spectra of **AIOC-104**, Co(Ac)<sub>2</sub>·4H<sub>2</sub>O and Al(O<sup>i</sup>Pr)<sub>3</sub>.

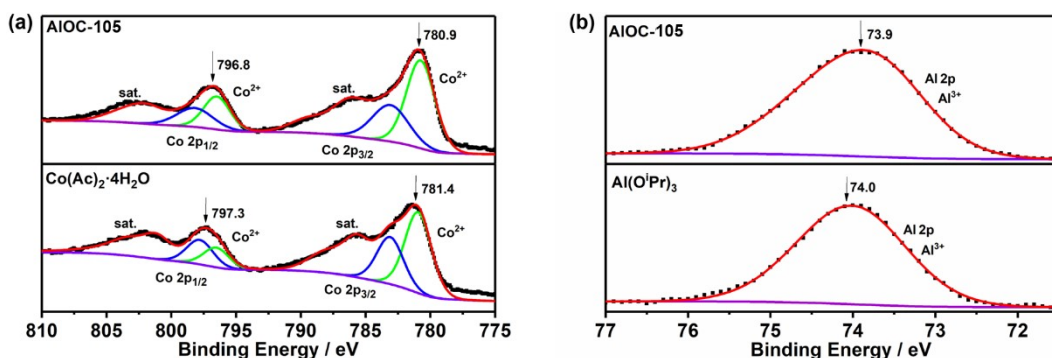

Fig. S75. The Co 2p and Al 2p XPS spectra of **AIOC-105**, Co(Ac)<sub>2</sub>·4H<sub>2</sub>O and Al(O<sup>i</sup>Pr)<sub>3</sub>.

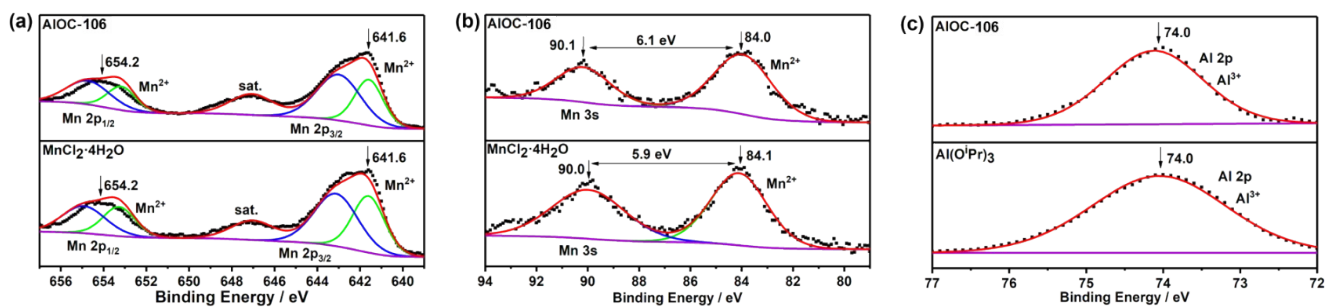

Fig. S76. The Mn 2p, Mn 3s and Al 2p XPS spectra of **AIOC-106**, MnCl<sub>2</sub>·4H<sub>2</sub>O and Al(O<sup>i</sup>Pr)<sub>3</sub>.

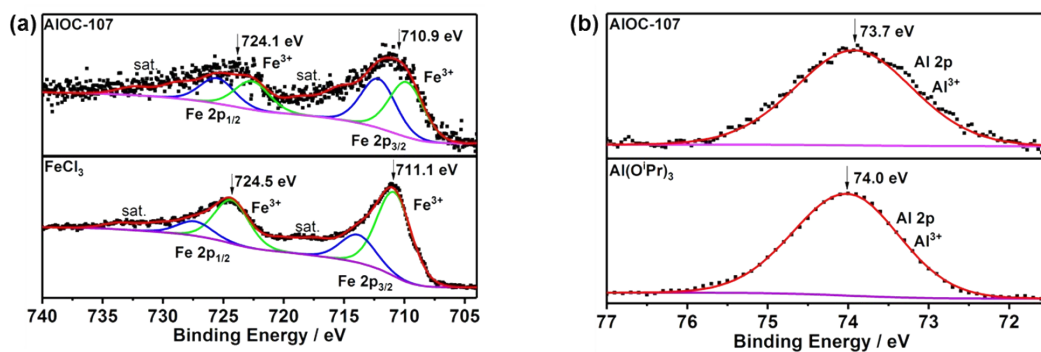

Fig. S77. The Fe 2p and Al 2p XPS spectra of **AIOC-107**, FeCl<sub>3</sub> and Al(O<sup>i</sup>Pr)<sub>3</sub>.

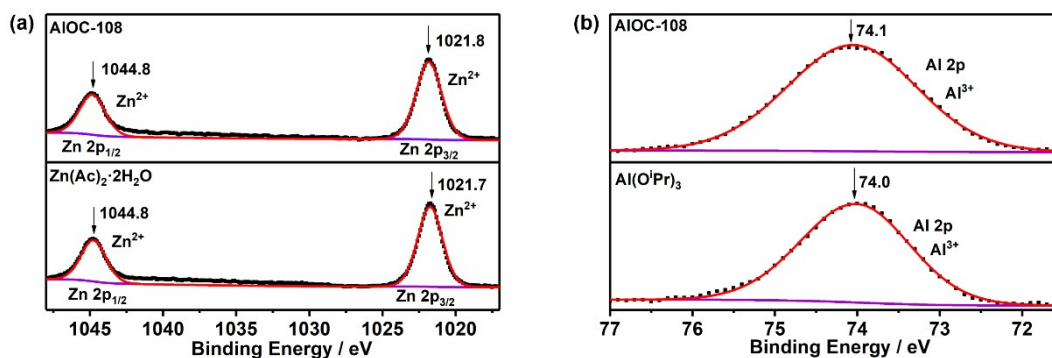

Fig. S78. The Zn 2p and Al 2p XPS spectra of **AIOC-108**, Zn(Ac)<sub>2</sub>·2H<sub>2</sub>O and Al(O<sup>i</sup>Pr)<sub>3</sub>.

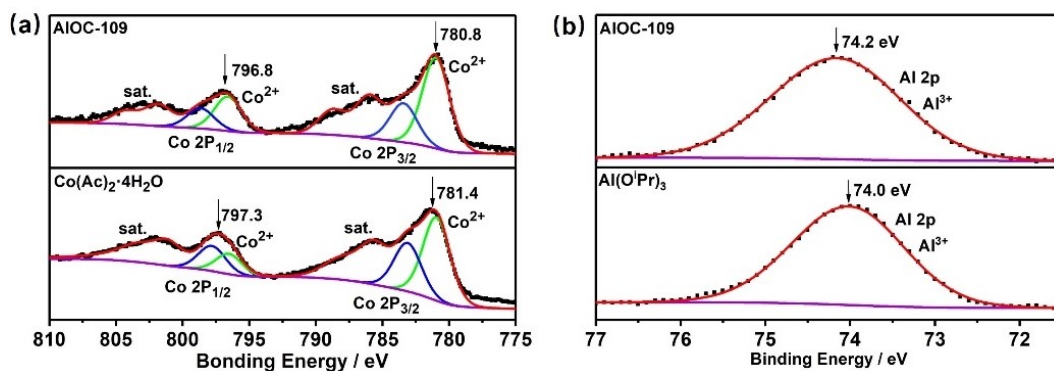

Fig. S79. The Co 2p and Al 2p XPS spectra of **AIOC-109**, Co(Ac)<sub>2</sub>·4H<sub>2</sub>O and Al(O<sup>i</sup>Pr)<sub>3</sub>.

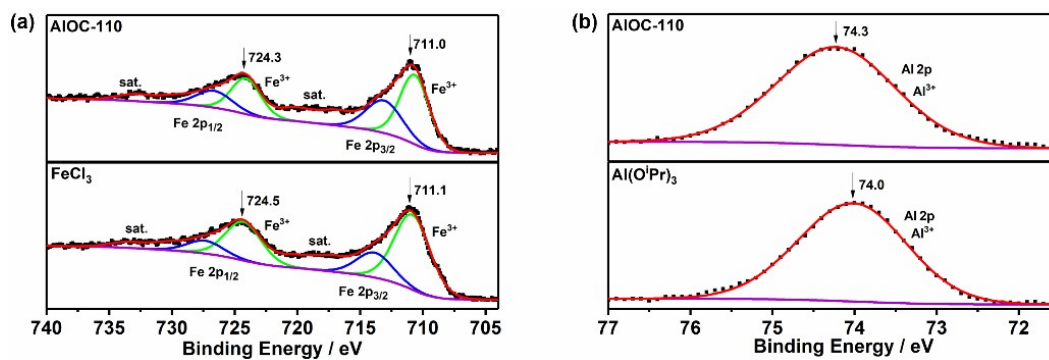

Fig. S80. The Fe 2p and Al 2p XPS spectra of AIOC-110, FeCl<sub>3</sub> and Al(O<sup>i</sup>Pr)<sub>3</sub>.

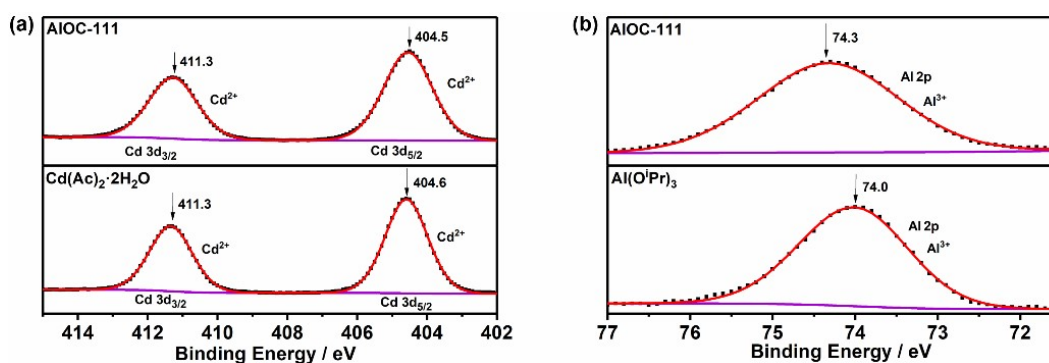

Fig. S81. The Cd 3d and Al 2p XPS spectra of AIOC-111, Cd(Ac)<sub>2</sub>·2H<sub>2</sub>O and Al(O<sup>i</sup>Pr)<sub>3</sub>.

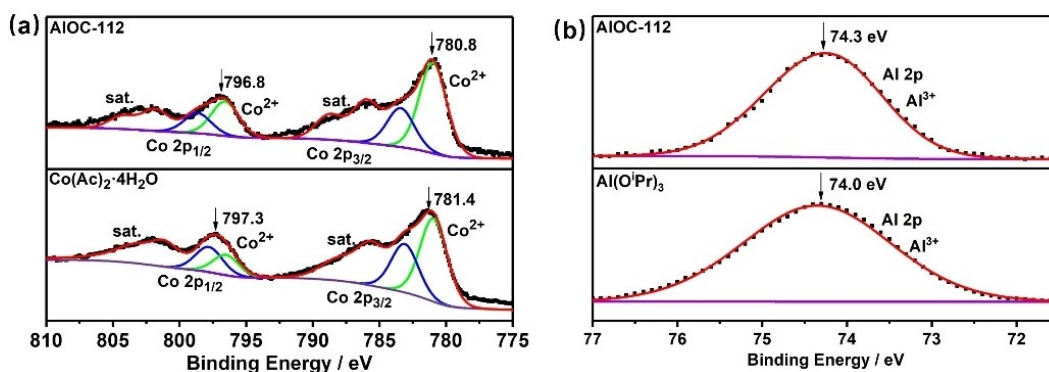

Fig. S82. The Co 2p and Al 2p XPS spectra of AIOC-112, Co(Ac)<sub>2</sub>·4H<sub>2</sub>O and Al(O<sup>i</sup>Pr)<sub>3</sub>.

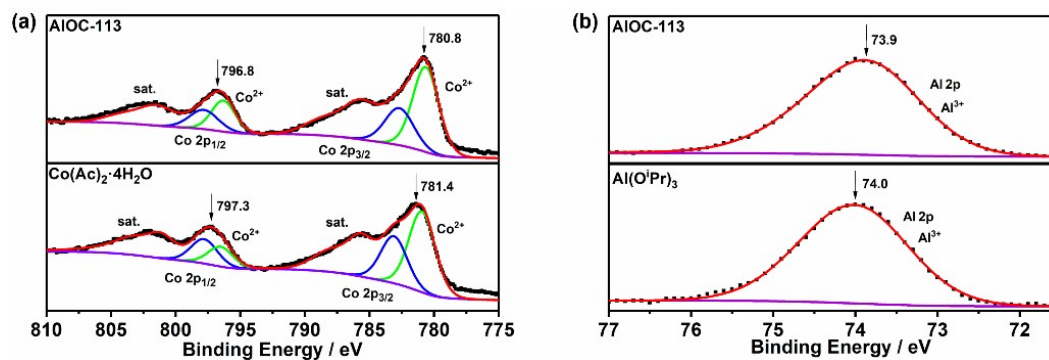

Fig. S83. The Co 2p and Al 2p XPS spectra of AIOC-113, Co(Ac)<sub>2</sub>·4H<sub>2</sub>O and Al(O<sup>i</sup>Pr)<sub>3</sub>.

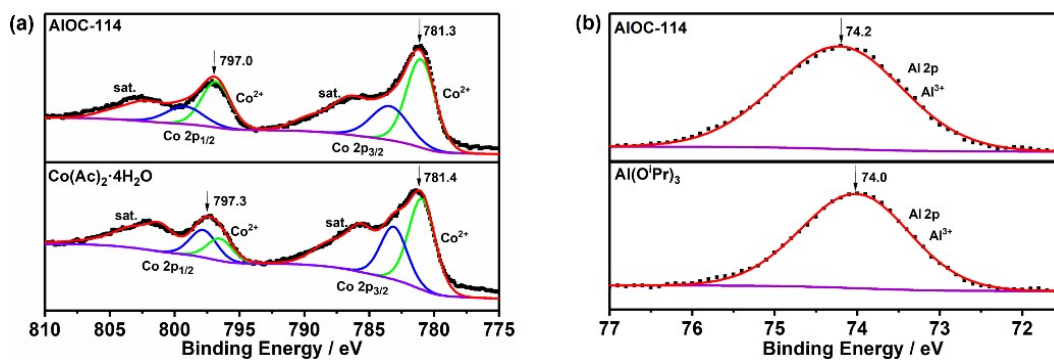

Fig. S84. The Co 2p and Al 2p XPS spectra of **AIOC-114**,  $\text{Co}(\text{Ac})_2 \cdot 4\text{H}_2\text{O}$  and  $\text{Al}(\text{O}^i\text{Pr})_3$ .

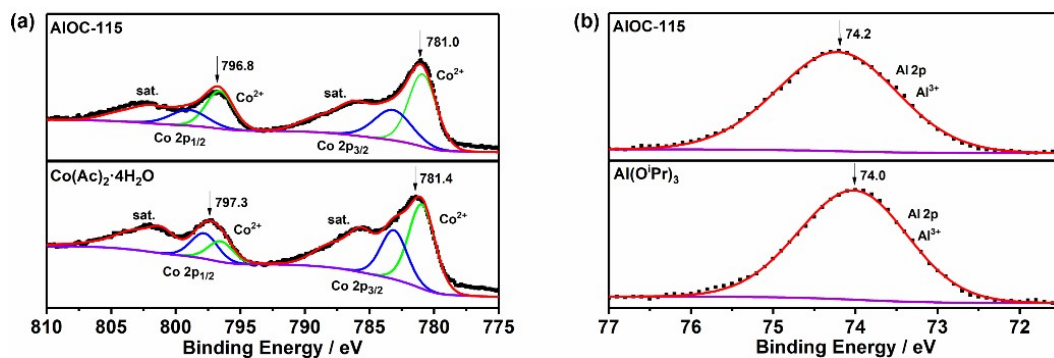

Fig. S85. The Co 2p and Al 2p XPS spectra of **AIOC-115**,  $\text{Co}(\text{Ac})_2 \cdot 4\text{H}_2\text{O}$  and  $\text{Al}(\text{O}^i\text{Pr})_3$ .

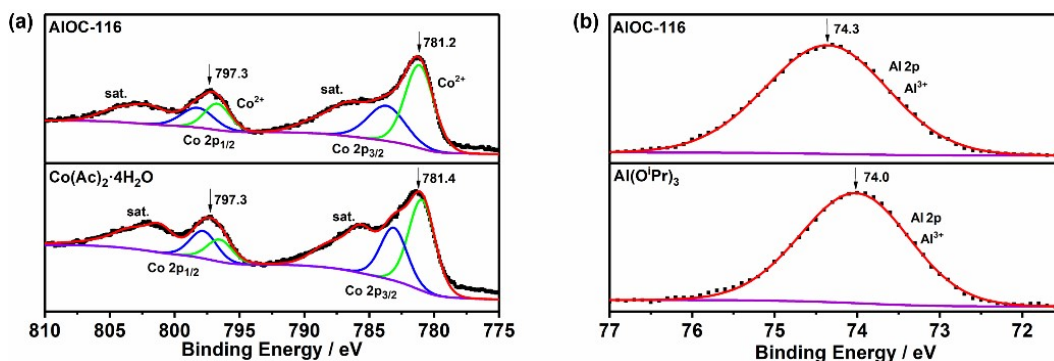

Fig. S86. The Co 2p and Al 2p XPS spectra of **AIOC-116**,  $\text{Co}(\text{Ac})_2 \cdot 4\text{H}_2\text{O}$  and  $\text{Al}(\text{O}^i\text{Pr})_3$ .

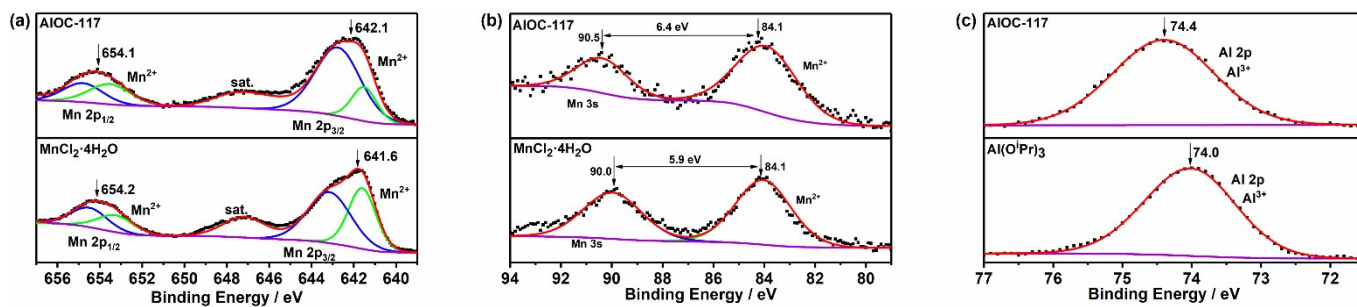

Fig. S87. The Mn 2p, Mn 3s and Al 2p XPS spectra of **AIOC-117**,  $\text{MnCl}_2 \cdot 4\text{H}_2\text{O}$  and  $\text{Al}(\text{O}^i\text{Pr})_3$ .

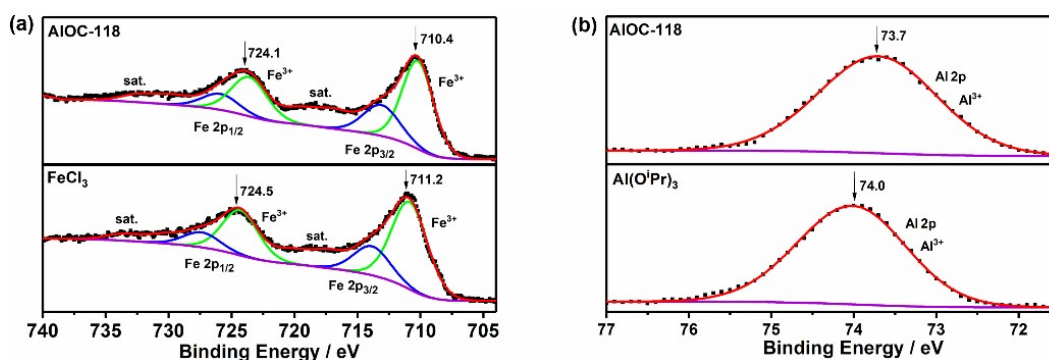

Fig. S88. The Fe 2p and Al 2p XPS spectra of **AIOC-118**,  $\text{FeCl}_3$  and  $\text{Al}(\text{O}^i\text{Pr})_3$ .

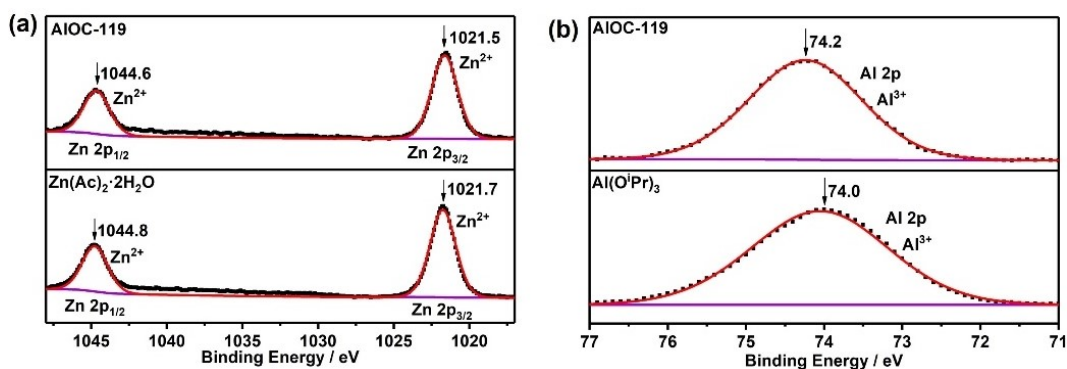

Fig. S89. The Zn 2p and Al 2p XPS spectra of **AIOC-119**,  $\text{Zn}(\text{Ac})_2 \cdot 2\text{H}_2\text{O}$  and  $\text{Al}(\text{O}^i\text{Pr})_3$ .

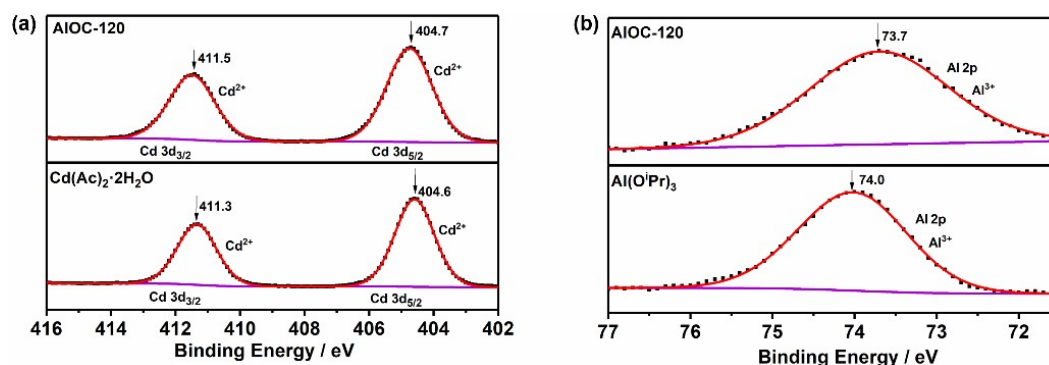

Fig. S90. The Cd 3d and Al 2p XPS spectra of **AIOC-120**,  $\text{Cd}(\text{Ac})_2 \cdot 2\text{H}_2\text{O}$  and  $\text{Al}(\text{O}^i\text{Pr})_3$ .

#### Discussion for XPS spectra:

The XPS measurements of **AIOC-99** to **AIOC-120** were conducted to verify the valence states of metal ions in frameworks. The high-resolution Co 2p spectra exhibit two main regions of Co 2p<sub>1/2</sub> and Co 2p<sub>3/2</sub> with ca. 16 eV binding energy difference (Fig. S69–S75, S79, and S82–S86).<sup>[1–2]</sup> In Co 2p<sub>1/2</sub> region, it can be deconvoluted into two peaks of Co<sup>2+</sup> at 796.7–797.3 eV and the corresponding shake-up satellite peak at 801.8–802.7 eV. Similarly, Co 2p<sub>3/2</sub> region also demonstrates two peaks of Co<sup>2+</sup> (780.8–781.4 eV) and a relevant satellite peak (785.8–786.4 eV). The two satellite peaks are assigned to the shakeup excitation of high-spin Co<sup>2+</sup> ions. The Mn 2p spectra of **AIOC-106** and **AIOC-117** are split into two components at 641.6–642.1 eV (Mn 2p<sub>3/2</sub>) and 654.1–654.2 eV (Mn 2p<sub>1/2</sub>), with a satellite peak located at 647.1–647.3 eV (Fig. S76 and S87).<sup>[3]</sup> These binding energies are consistent with an Mn<sup>2+</sup> cation as reported for manganese oxide.<sup>[4]</sup> The Mn 3s core peak allows us to confirm the oxidation of Mn.<sup>[5]</sup> The splitting of this peak is dependent on the number of 3d electrons, and expected values are ~6.5 eV for Mn<sup>2+</sup>, ~5.5 eV for Mn<sup>3+</sup>, and ~4.5 eV for Mn<sup>4+</sup>. Here, the splitting value for **AIOC-106** and **AIOC-117** are respectively ~6.1 eV and 6.4 eV (Fig. S76b and S87b), indicated the existence of Mn<sup>2+</sup> in crystals. For **AIOC-108** and **AIOC-119**, the observed Zn 2p<sub>1/2</sub> and Zn 2p<sub>3/2</sub> are located at 1044.6–1044.8 eV and 1021.5–1021.8 eV, corresponding to Zn<sup>2+</sup> species (Fig. S78 and S89).<sup>[6–7]</sup> In Fig. S81 and S90, two peaks locate at about 411.3–411.5 eV and 404.5–404.7 eV, matched well with the spin-orbit separation between Cd 3d<sub>5/2</sub> and Cd 3d<sub>3/2</sub> of Cd<sup>2+</sup> in frameworks.<sup>[8]</sup> The Fe XPS analysis for **AIOC-107**, **AIOC-110** and **AIOC-118** were also researched, however, the obvious Fe<sup>3+</sup> signals were captured (Fig. S77, S80 and S88), which is inconsistency with BVS results.<sup>[9]</sup> This maybe owing to the rapid oxidation of external Fe<sup>2+</sup> specieses when freshly prepared crystals were exposed into air. The Al 2p signals only contain one peak centered at 73.9–74.3 eV, consistent with the literature value for Al<sup>3+</sup>.<sup>[10]</sup> Besides, the characteristic XPS peaks of **AIOC-99** to **AIOC-120** are in agreement with pure metal salts and  $\text{Al}(\text{O}^i\text{Pr})_3$ .

### 13. The UV-vis absorption spectra and Tau plots.

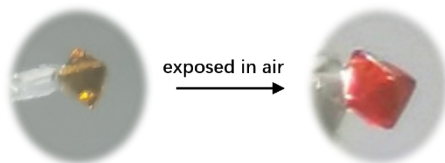

Fig. S91. The crystal colour of AIOC-110 before and after exposing in air.

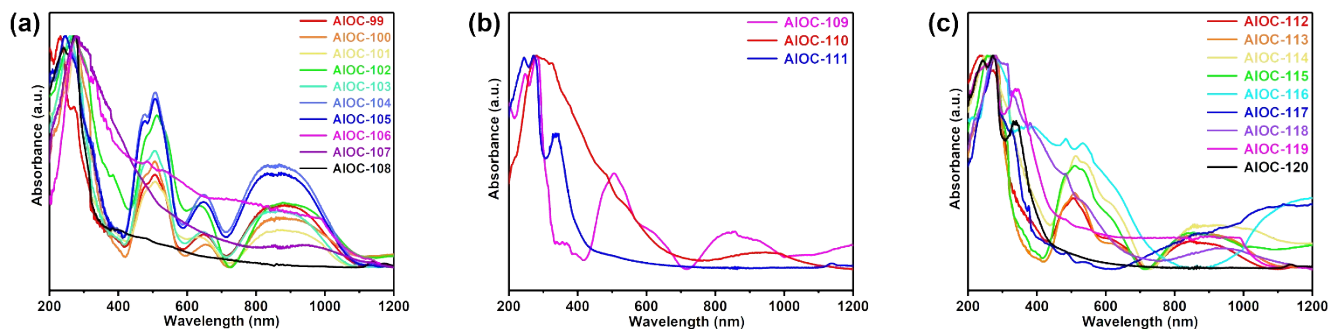

Fig. S92. The UV-vis absorption spectra.

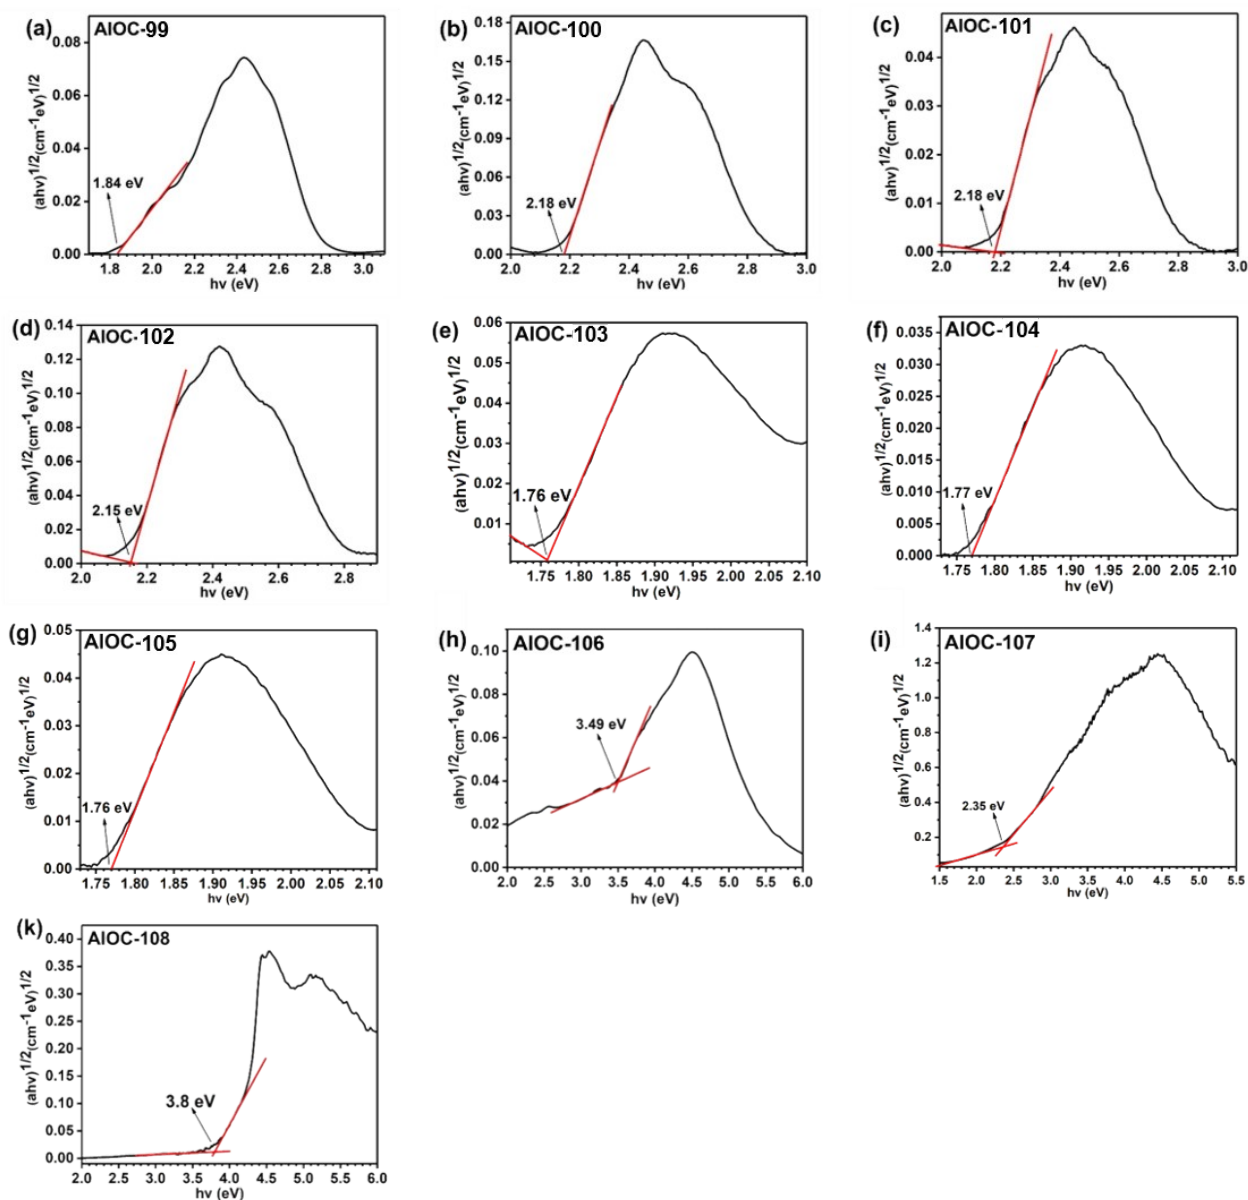

Fig. S93. Tau plots of two-fold interpenetrated diamond (*dia*) frameworks based on UV-vis diffuse reflectance spectra.

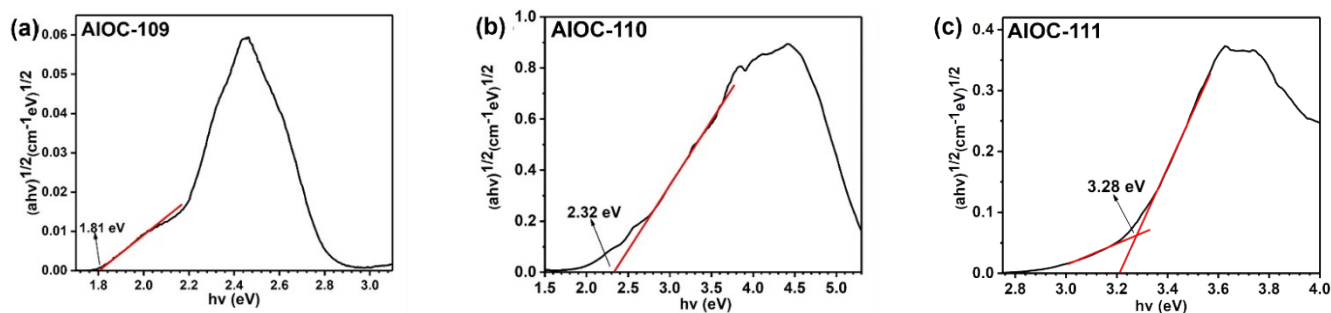

Fig. S94. Tau plots of non-interpenetrated diamond (*dia*) frameworks based on UV-vis diffuse reflectance spectra.

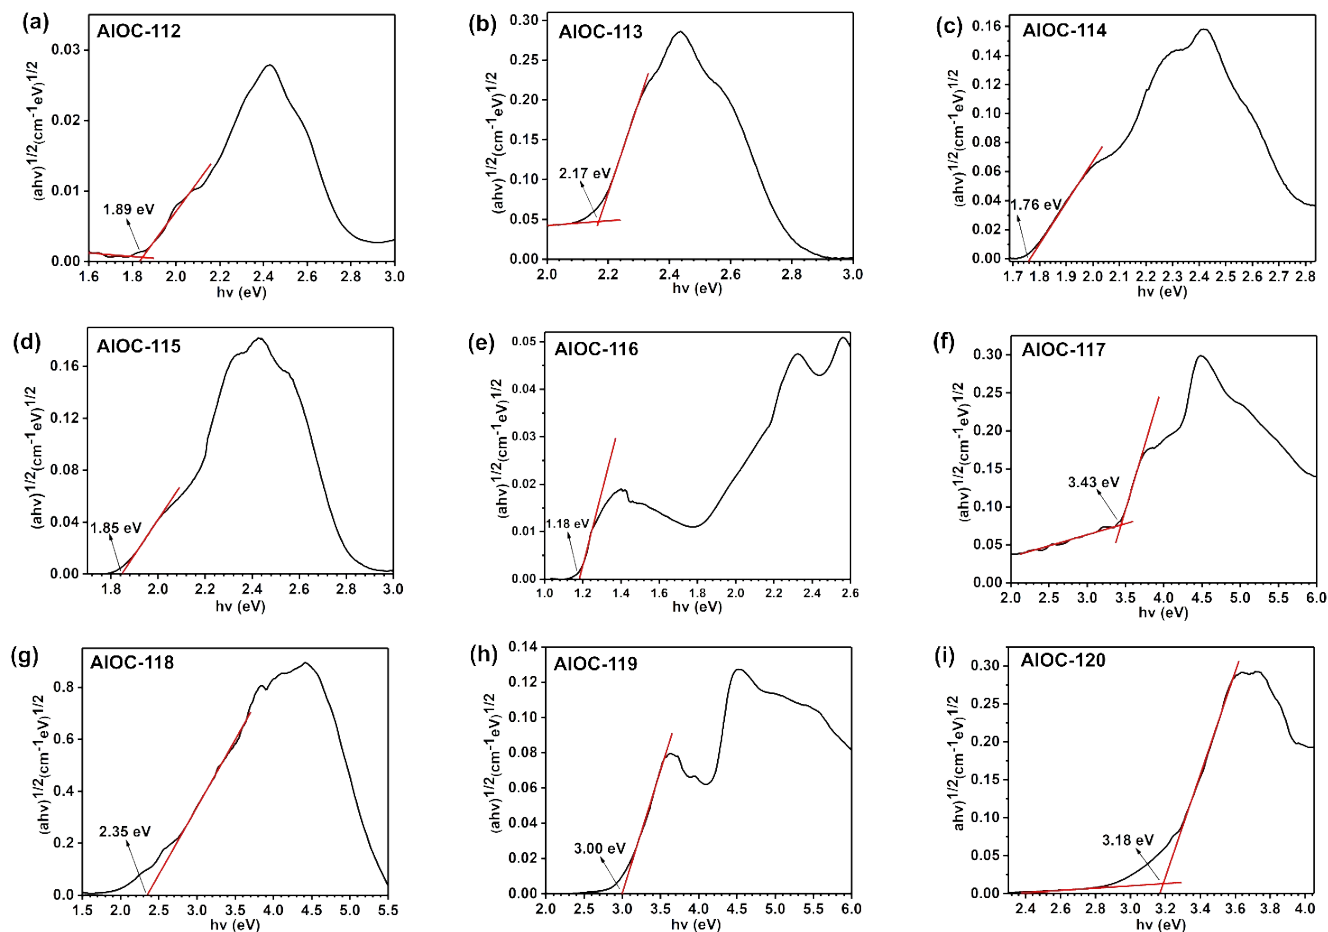

Fig. S95. Tau plots of non-interpenetrated lonsdaleite (*lon*) frameworks based on UV-vis diffuse reflectance spectra.

## 14. Catalytic stability.

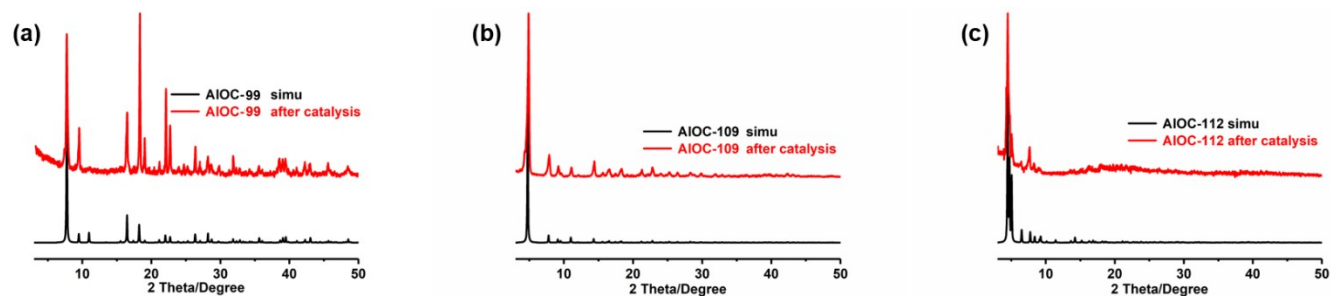

Fig. S96. PXRD patterns of AIOC-99, AIOC-109 and AIOC-112 after catalysis.



## Tables

**Table S1.** Crystallographic data and structure refinement parameters for two-fold interpenetrated diamond (*dia*) frameworks (AIOC-99 to AIOC-103).

|                                                                              | AIOC-99                                                                                        | AIOC-100                                                                                                       | AIOC-101                                                                                                       | AIOC-102                                                                                                       | AIOC-103                                                                                       |
|------------------------------------------------------------------------------|------------------------------------------------------------------------------------------------|----------------------------------------------------------------------------------------------------------------|----------------------------------------------------------------------------------------------------------------|----------------------------------------------------------------------------------------------------------------|------------------------------------------------------------------------------------------------|
| Empirical formula                                                            | C <sub>96</sub> H <sub>84</sub> Al <sub>4</sub> Co <sub>4</sub> N <sub>4</sub> O <sub>28</sub> | C <sub>96</sub> H <sub>72</sub> Al <sub>4</sub> Co <sub>4</sub> F <sub>12</sub> N <sub>4</sub> O <sub>28</sub> | C <sub>96</sub> H <sub>72</sub> Al <sub>4</sub> Co <sub>4</sub> F <sub>12</sub> N <sub>4</sub> O <sub>28</sub> | C <sub>96</sub> H <sub>72</sub> Al <sub>4</sub> Co <sub>4</sub> F <sub>12</sub> N <sub>4</sub> O <sub>28</sub> | C <sub>72</sub> H <sub>60</sub> Al <sub>4</sub> Co <sub>4</sub> N <sub>4</sub> O <sub>40</sub> |
| Formula weight                                                               | 2085.39                                                                                        | 2301.30                                                                                                        | 2301.21                                                                                                        | 2301.21                                                                                                        | 1964.96                                                                                        |
| Temperature / K                                                              | 105.61(11) K                                                                                   | 106.15(10) K                                                                                                   | 105.66(11) K                                                                                                   | 105.94(10) K                                                                                                   | 105.63(19) K                                                                                   |
| Crystal system                                                               | Cubic                                                                                          | Cubic                                                                                                          | Cubic                                                                                                          | Cubic                                                                                                          | Cubic                                                                                          |
| Space group                                                                  | <i>Fd-3c</i>                                                                                   | <i>Fd-3c</i>                                                                                                   | <i>Fd-3c</i>                                                                                                   | <i>Fd-3c</i>                                                                                                   | <i>Fd-3c</i>                                                                                   |
| <i>a</i> [Å]                                                                 | 32.2520(2)                                                                                     | 32.1911(2)                                                                                                     | 32.3063(3)                                                                                                     | 32.7575(6)                                                                                                     | 31.6599(6)                                                                                     |
| <i>b</i> [Å]                                                                 | 32.2520(2)                                                                                     | 32.1911(2)                                                                                                     | 32.3063(3)                                                                                                     | 32.7575(6)                                                                                                     | 31.6599(6)                                                                                     |
| <i>c</i> [Å]                                                                 | 32.2520(2)                                                                                     | 32.1911(2)                                                                                                     | 32.3063(3)                                                                                                     | 32.7575(6)                                                                                                     | 31.6599(6)                                                                                     |
| $\alpha$ [°]                                                                 | 90                                                                                             | 90                                                                                                             | 90                                                                                                             | 90                                                                                                             | 90                                                                                             |
| $\beta$ [°]                                                                  | 90                                                                                             | 90                                                                                                             | 90                                                                                                             | 90                                                                                                             | 90                                                                                             |
| $\gamma$ [°]                                                                 | 90                                                                                             | 90                                                                                                             | 90                                                                                                             | 90                                                                                                             | 90                                                                                             |
| <i>V</i> [Å <sup>3</sup> ]                                                   | 33548.3(6)                                                                                     | 33358.6(6)                                                                                                     | 33718.0(9)                                                                                                     | 35150.6(19)                                                                                                    | 31734.3(18)                                                                                    |
| <i>Z</i>                                                                     | 15.99936                                                                                       | 15.99936                                                                                                       | 16                                                                                                             | 16                                                                                                             | 15.99936                                                                                       |
| $\rho_{\text{calcd}}$ [g cm <sup>-3</sup> ]                                  | 1.651                                                                                          | 1.833                                                                                                          | 1.813                                                                                                          | 1.739                                                                                                          | 1.645                                                                                          |
| $\mu$ [mm <sup>-1</sup> ]                                                    | 4.958                                                                                          | 5.168                                                                                                          | 5.114                                                                                                          | 4.905                                                                                                          | 5.288                                                                                          |
| <i>F</i> (000)                                                               | 17152.0                                                                                        | 18688.0                                                                                                        | 18688.0                                                                                                        | 18688.0                                                                                                        | 16000.0                                                                                        |
| Index ranges                                                                 | -26 ≤ <i>h</i> ≤ 38<br>-41 ≤ <i>k</i> ≤ 39<br>-19 ≤ <i>l</i> ≤ 29                              | -38 ≤ <i>h</i> ≤ 40<br>-26 ≤ <i>k</i> ≤ 33<br>-28 ≤ <i>l</i> ≤ 40                                              | -39 ≤ <i>h</i> ≤ 24<br>-40 ≤ <i>k</i> ≤ 25<br>-24 ≤ <i>l</i> ≤ 31                                              | -22 ≤ <i>h</i> ≤ 39<br>-21 ≤ <i>k</i> ≤ 36<br>-31 ≤ <i>l</i> ≤ 40                                              | -17 ≤ <i>h</i> ≤ 30<br>-39 ≤ <i>k</i> ≤ 21<br>-19 ≤ <i>l</i> ≤ 29                              |
| Reflns collected                                                             | 10409                                                                                          | 9217                                                                                                           | 9405                                                                                                           | 9910                                                                                                           | 9217                                                                                           |
| unique reflns [ <i>R</i> <sub>int</sub> ]                                    | 1586[0.0212]                                                                                   | 1435 [0.0223]                                                                                                  | 1405 [0.0384]                                                                                                  | 1503 [0.1526]                                                                                                  | 1350[0.0507]                                                                                   |
| data/restraints/parameters                                                   | 1586/84/128                                                                                    | 1435/78/160                                                                                                    | 1405/57/109                                                                                                    | 1503/37/101                                                                                                    | 1350/0/94                                                                                      |
| GOF on <i>F</i> <sup>2</sup>                                                 | 1.056                                                                                          | 1.126                                                                                                          | 1.077                                                                                                          | 1.146                                                                                                          | 1.135                                                                                          |
| <i>R</i> <sub>1</sub> , w <i>R</i> <sub>2</sub> [ <i>I</i> > 2σ( <i>I</i> )] | 0.0801, 0.2357                                                                                 | 0.0759, 0.2338                                                                                                 | 0.1149, 0.3019                                                                                                 | 0.1474, 0.3309                                                                                                 | 0.0998, 0.2250                                                                                 |
| <i>R</i> <sub>1</sub> , w <i>R</i> <sub>2</sub> [all data]                   | 0.0878, 0.2444                                                                                 | 0.0867, 0.2477                                                                                                 | 0.1415, 0.3286                                                                                                 | 0.2083, 0.3653                                                                                                 | 0.1427, 0.2526                                                                                 |
| $\Delta\rho_{\text{min}}/\Delta\rho_{\text{max}}$ (e·Å <sup>-3</sup> )       | 1.03/-0.83                                                                                     | 0.36/-0.58                                                                                                     | 1.23/-1.11                                                                                                     | 0.55/-0.71                                                                                                     | 0.97/-0.42                                                                                     |
| CCDC number                                                                  | 2056099                                                                                        | 2056100                                                                                                        | 2056101                                                                                                        | 2056102                                                                                                        | 2056103                                                                                        |

**Table S2.** Crystallographic data and structure refinement parameters for two-fold interpenetrated diamond (*dia*) frameworks (AIOC-104 to AIOC-108).

|                                                                             | AIOC-104                                                                                                       | AIOC-105                                                                                                       | AIOC-106                                                                                       | AIOC-107                                                                                       | AIOC-108                                                                                       |
|-----------------------------------------------------------------------------|----------------------------------------------------------------------------------------------------------------|----------------------------------------------------------------------------------------------------------------|------------------------------------------------------------------------------------------------|------------------------------------------------------------------------------------------------|------------------------------------------------------------------------------------------------|
| Empirical formula                                                           | C <sub>72</sub> H <sub>60</sub> Al <sub>4</sub> Co <sub>4</sub> N <sub>4</sub> O <sub>28</sub> S <sub>12</sub> | C <sub>72</sub> H <sub>60</sub> Al <sub>4</sub> Co <sub>4</sub> N <sub>4</sub> O <sub>28</sub> S <sub>12</sub> | C <sub>96</sub> H <sub>84</sub> Al <sub>4</sub> Mn <sub>4</sub> N <sub>4</sub> O <sub>28</sub> | C <sub>96</sub> H <sub>84</sub> Al <sub>4</sub> Fe <sub>4</sub> N <sub>4</sub> O <sub>28</sub> | C <sub>96</sub> H <sub>84</sub> Al <sub>4</sub> Zn <sub>4</sub> N <sub>4</sub> O <sub>28</sub> |
| Formula weight                                                              | 2157.68                                                                                                        | 2157.68                                                                                                        | 2069.35                                                                                        | 2073.07                                                                                        | 2111.15                                                                                        |
| Temperature / K                                                             | 105.84(14) K                                                                                                   | 105.89(10) K                                                                                                   | 293(2) K                                                                                       | 99.99(10) K                                                                                    | 108.44(10) K                                                                                   |
| Crystal system                                                              | Cubic                                                                                                          | Cubic                                                                                                          | Cubic                                                                                          | Cubic                                                                                          | Cubic                                                                                          |
| Space group                                                                 | <i>Fd-3c</i>                                                                                                   | <i>Fd-3c</i>                                                                                                   | <i>Fd-3c</i>                                                                                   | <i>Fd-3c</i>                                                                                   | <i>Fd-3c</i>                                                                                   |
| <i>a</i> [Å]                                                                | 32.0714(6)                                                                                                     | 32.3326(9)                                                                                                     | 32.8415(3)                                                                                     | 32.3651(4)                                                                                     | 32.2437(2)                                                                                     |
| <i>b</i> [Å]                                                                | 32.0714(6)                                                                                                     | 32.3326(9)                                                                                                     | 32.8415(3)                                                                                     | 32.3651(4)                                                                                     | 32.2437(2)                                                                                     |
| <i>c</i> [Å]                                                                | 32.0714(6)                                                                                                     | 32.3326(9)                                                                                                     | 32.8415(3)                                                                                     | 32.3651(4)                                                                                     | 32.2437(2)                                                                                     |
| $\alpha$ [°]                                                                | 90                                                                                                             | 90                                                                                                             | 90                                                                                             | 90                                                                                             | 90                                                                                             |
| $\beta$ [°]                                                                 | 90                                                                                                             | 90                                                                                                             | 90                                                                                             | 90                                                                                             | 90                                                                                             |
| $\gamma$ [°]                                                                | 90                                                                                                             | 90                                                                                                             | 90                                                                                             | 90                                                                                             | 90                                                                                             |
| <i>V</i> [Å <sup>3</sup> ]                                                  | 32987.8(19)                                                                                                    | 33800(3)                                                                                                       | 35421.7(10)                                                                                    | 33902.4(13)                                                                                    | 33522.4(6)                                                                                     |
| <i>Z</i>                                                                    | 15.99936                                                                                                       | 16                                                                                                             | 16                                                                                             | 15.99936                                                                                       | 15.99936                                                                                       |
| $\rho_{\text{calcd}}$ [g cm <sup>-3</sup> ]                                 | 1.738                                                                                                          | 1.696                                                                                                          | 1.552                                                                                          | 1.625                                                                                          | 1.673                                                                                          |
| $\mu$ [mm <sup>-1</sup> ]                                                   | 6.857                                                                                                          | 6.692                                                                                                          | 0.684                                                                                          | 4.367                                                                                          | 1.548                                                                                          |
| <i>F</i> (000)                                                              | 17536.0                                                                                                        | 17536.0                                                                                                        | 17024.0                                                                                        | 17088.0                                                                                        | 17344.0                                                                                        |
| Index ranges                                                                | -23 ≤ <i>h</i> ≤ 34<br>-38 ≤ <i>k</i> ≤ 40<br>-21 ≤ <i>l</i> ≤ 29                                              | -23 ≤ <i>h</i> ≤ 31<br>-24 ≤ <i>k</i> ≤ 38<br>-40 ≤ <i>l</i> ≤ 38                                              | -39 ≤ <i>h</i> ≤ 41<br>-41 ≤ <i>k</i> ≤ 41<br>-40 ≤ <i>l</i> ≤ 41                              | -36 ≤ <i>h</i> ≤ 37<br>-34 ≤ <i>k</i> ≤ 20<br>-23 ≤ <i>l</i> ≤ 28                              | -5 ≤ <i>h</i> ≤ 41<br>-19 ≤ <i>k</i> ≤ 31<br>-40 ≤ <i>l</i> ≤ 18                               |
| Reflns collected                                                            | 9190                                                                                                           | 9024                                                                                                           | 56347                                                                                          | 7286                                                                                           | 9994                                                                                           |
| unique reflns [ <i>R</i> <sub>int</sub> ]                                   | 1385 [0.0984]                                                                                                  | 1444 [0.0850]                                                                                                  | 1522 [0.0798]                                                                                  | 1168 [0.0262]                                                                                  | 1573 [0.0206]                                                                                  |
| data/restraints/parameters                                                  | 1385/6/85                                                                                                      | 1444/12/94                                                                                                     | 1522/150/134                                                                                   | 1168/219/136                                                                                   | 1573/72/134                                                                                    |
| GOF on <i>F</i> <sup>2</sup>                                                | 1.308                                                                                                          | 1.097                                                                                                          | 1.185                                                                                          | 1.051                                                                                          | 1.154                                                                                          |
| <i>R</i> <sub>1</sub> , <i>wR</i> <sub>2</sub> [ <i>I</i> > 2σ( <i>I</i> )] | 0.1447, 0.3634                                                                                                 | 0.1274, 0.3121                                                                                                 | 0.0858, 0.2422                                                                                 | 0.0566, 0.1641                                                                                 | 0.0548, 0.1676                                                                                 |
| <i>R</i> <sub>1</sub> , <i>wR</i> <sub>2</sub> [all data]                   | 0.2094, 0.4048                                                                                                 | 0.1813, 0.3512                                                                                                 | 0.0997, 0.2547                                                                                 | 0.0715, 0.1779                                                                                 | 0.0568, 0.1697                                                                                 |
| $\Delta\rho_{\text{min}}/\Delta\rho_{\text{max}}$ (e-Å <sup>-3</sup> )      | 0.93/-0.75                                                                                                     | 0.98/-0.94                                                                                                     | 0.39/-0.46                                                                                     | 0.40/-0.48                                                                                     | 0.36/-0.43                                                                                     |
| CCDC number                                                                 | 2056104                                                                                                        | 2056105                                                                                                        | 2056106                                                                                        | 2156657                                                                                        | 2056107                                                                                        |

**Table S3.** Crystallographic data and structure refinement parameters for non-interpenetrated diamond (*dia*) frameworks (AIOC-109 to AIOC-111).

|                                                                             | AIOC-109                                                                                         | AIOC-110                                                                                       | AIOC-111                                                                                       |
|-----------------------------------------------------------------------------|--------------------------------------------------------------------------------------------------|------------------------------------------------------------------------------------------------|------------------------------------------------------------------------------------------------|
| Empirical formula                                                           | C <sub>108</sub> H <sub>108</sub> Al <sub>4</sub> Co <sub>4</sub> N <sub>4</sub> O <sub>28</sub> | C <sub>96</sub> H <sub>84</sub> Al <sub>4</sub> Fe <sub>4</sub> N <sub>4</sub> O <sub>28</sub> | C <sub>96</sub> H <sub>84</sub> Al <sub>4</sub> Cd <sub>4</sub> N <sub>4</sub> O <sub>28</sub> |
| Formula weight                                                              | 2253.62                                                                                          | 2072.99                                                                                        | 2299.19                                                                                        |
| Temperature / K                                                             | 293(2) K                                                                                         | 108.56(10) K                                                                                   | 108.29(11) K                                                                                   |
| Crystal system                                                              | Cubic                                                                                            | Cubic                                                                                          | Cubic                                                                                          |
| Space group                                                                 | <i>F</i> <sub>4</sub> <sub>3</sub> <sub>2</sub>                                                  | <i>F</i> <sub>4</sub> <sub>3</sub> <sub>2</sub>                                                | <i>F</i> <sub>4</sub> <sub>3</sub> <sub>2</sub>                                                |
| <i>a</i> [Å]                                                                | 32.1474(2)                                                                                       | 32.1100(6)                                                                                     | 32.8932(3)                                                                                     |
| <i>b</i> [Å]                                                                | 32.1474(2)                                                                                       | 32.1100(6)                                                                                     | 32.8932(3)                                                                                     |
| <i>c</i> [Å]                                                                | 32.1474(2)                                                                                       | 32.1100(6)                                                                                     | 32.8932(3)                                                                                     |
| $\alpha$ [°]                                                                | 90                                                                                               | 90                                                                                             | 90                                                                                             |
| $\beta$ [°]                                                                 | 90                                                                                               | 90                                                                                             | 90                                                                                             |
| $\gamma$ [°]                                                                | 90                                                                                               | 90                                                                                             | 90                                                                                             |
| <i>V</i> [Å <sup>3</sup> ]                                                  | 33222.9(6)                                                                                       | 33107.1(19)                                                                                    | 35589.2(10)                                                                                    |
| <i>Z</i>                                                                    | 8                                                                                                | 8                                                                                              | 8                                                                                              |
| $\rho_{\text{calcd}}$ [g cm <sup>-3</sup> ]                                 | 0.901                                                                                            | 0.832                                                                                          | 0.858                                                                                          |
| $\mu$ [mm <sup>-1</sup> ]                                                   | 2.520                                                                                            | 2.236                                                                                          | 2.882                                                                                          |
| <i>F</i> (000)                                                              | 9344.0                                                                                           | 8544.0                                                                                         | 9248.0                                                                                         |
| Index ranges                                                                | -36 ≤ <i>h</i> ≤ 38<br>-36 ≤ <i>k</i> ≤ 30<br>-37 ≤ <i>l</i> ≤ 37                                | -17 ≤ <i>h</i> ≤ 38<br>-24 ≤ <i>k</i> ≤ 28<br>-40 ≤ <i>l</i> ≤ 38                              | -41 ≤ <i>h</i> ≤ 33<br>-38 ≤ <i>k</i> ≤ 42<br>-38 ≤ <i>l</i> ≤ 33                              |
| Reflections collected                                                       | 30287                                                                                            | 10983                                                                                          | 40255                                                                                          |
| Independent reflections [ <i>R</i> <sub>int</sub> ]                         | 2554 [0.0400]                                                                                    | 3067 [0.0465]                                                                                  | 3395 [0.1600]                                                                                  |
| data/restraints/parameters                                                  | 2554/37/112                                                                                      | 3067/2/97                                                                                      | 3395/18/103                                                                                    |
| GOF on <i>F</i> <sup>2</sup>                                                | 1.062                                                                                            | 0.994                                                                                          | 1.021                                                                                          |
| <i>R</i> <sub>1</sub> , <i>wR</i> <sub>2</sub> [ <i>I</i> > 2σ( <i>I</i> )] | 0.0736, 0.2196                                                                                   | 0.0634, 0.1836                                                                                 | 0.0751, 0.1956                                                                                 |
| <i>R</i> <sub>1</sub> , <i>wR</i> <sub>2</sub> [all data]                   | 0.0882, 0.2409                                                                                   | 0.1068, 0.2120                                                                                 | 0.0810, 0.2001                                                                                 |
| $\Delta\rho_{\text{min}}/\Delta\rho_{\text{max}}$ (e·Å <sup>-3</sup> )      | 0.67/-0.31                                                                                       | 0.45/-0.26                                                                                     | 0.71/-0.62                                                                                     |
| Flack parameter                                                             | 0.085(18)                                                                                        | 0.082(18)                                                                                      | 0.463(13)                                                                                      |
| CCDC number                                                                 | 2056108                                                                                          | 2056109                                                                                        | 2056110                                                                                        |

**Table S4.** Crystallographic data and structure refinement parameters for lonsdaleite (*lon*) frameworks (AIOC-112 to AIOC-120).

|                                                                             | AIOC-112                                                                                       | AIOC-113                                                                                                       | AIOC-114                                                                                                        | AIOC-115                                                                                         | AIOC-116                                                                                        | AIOC-117                                                                                       | AIOC-118                                                                                       | AIOC-119                                                                                       | AIOC-120                                                                                       |
|-----------------------------------------------------------------------------|------------------------------------------------------------------------------------------------|----------------------------------------------------------------------------------------------------------------|-----------------------------------------------------------------------------------------------------------------|--------------------------------------------------------------------------------------------------|-------------------------------------------------------------------------------------------------|------------------------------------------------------------------------------------------------|------------------------------------------------------------------------------------------------|------------------------------------------------------------------------------------------------|------------------------------------------------------------------------------------------------|
| Empirical formula                                                           | C <sub>96</sub> H <sub>84</sub> Al <sub>4</sub> Co <sub>4</sub> N <sub>4</sub> O <sub>28</sub> | C <sub>96</sub> H <sub>72</sub> Al <sub>4</sub> Co <sub>4</sub> F <sub>12</sub> N <sub>4</sub> O <sub>28</sub> | C <sub>96</sub> H <sub>72</sub> Al <sub>4</sub> Co <sub>4</sub> Cl <sub>12</sub> N <sub>4</sub> O <sub>28</sub> | C <sub>108</sub> H <sub>108</sub> Al <sub>4</sub> Co <sub>4</sub> N <sub>4</sub> O <sub>28</sub> | C <sub>96</sub> H <sub>96</sub> Al <sub>4</sub> Co <sub>4</sub> N <sub>16</sub> O <sub>28</sub> | C <sub>96</sub> H <sub>84</sub> Al <sub>4</sub> Mn <sub>4</sub> N <sub>4</sub> O <sub>28</sub> | C <sub>96</sub> H <sub>84</sub> Al <sub>4</sub> Fe <sub>4</sub> N <sub>4</sub> O <sub>28</sub> | C <sub>96</sub> H <sub>84</sub> Al <sub>4</sub> Zn <sub>4</sub> N <sub>4</sub> O <sub>28</sub> | C <sub>96</sub> H <sub>84</sub> Al <sub>4</sub> Cd <sub>4</sub> N <sub>4</sub> O <sub>28</sub> |
| Formula weight                                                              | 2085.33                                                                                        | 2301.23                                                                                                        | 2498.64                                                                                                         | 2253.64                                                                                          | 2265.52                                                                                         | 2069.35                                                                                        | 2073.01                                                                                        | 2111.07                                                                                        | 2299.21                                                                                        |
| Temperature / K                                                             | 298.83 K                                                                                       | 105.8(3) K                                                                                                     | 106.22(10) K                                                                                                    | 105.78(10) K                                                                                     | 109.8(3) K                                                                                      | 100.00(18) K                                                                                   | 100.00(14) K                                                                                   | 293(2) K                                                                                       | 108.30(10) K                                                                                   |
| Crystal system                                                              | Hexagonal                                                                                      | Hexagonal                                                                                                      | Hexagonal                                                                                                       | Hexagonal                                                                                        | Hexagonal                                                                                       | Hexagonal                                                                                      | Hexagonal                                                                                      | Hexagonal                                                                                      | Hexagonal                                                                                      |
| Space group                                                                 | <i>P</i> -62 <i>c</i>                                                                          | <i>P</i> -62 <i>c</i>                                                                                          | <i>P</i> -62 <i>c</i>                                                                                           | <i>P</i> -62 <i>c</i>                                                                            | <i>P</i> -62 <i>c</i>                                                                           | <i>P</i> -62 <i>c</i>                                                                          | <i>P</i> -62 <i>c</i>                                                                          | <i>P</i> -62 <i>c</i>                                                                          | <i>P</i> -62 <i>c</i>                                                                          |
| <i>a</i> [Å]                                                                | 22.8201(6)                                                                                     | 22.6534(4)                                                                                                     | 22.7823(2)                                                                                                      | 22.6942(3)                                                                                       | 22.6772(3)                                                                                      | 22.9056(5)                                                                                     | 22.7862(8)                                                                                     | 22.8185(4)                                                                                     | 23.1974(5)                                                                                     |
| <i>b</i> [Å]                                                                | 22.8201(6)                                                                                     | 22.6534(4)                                                                                                     | 22.7823(2)                                                                                                      | 22.6942(3)                                                                                       | 22.6772(3)                                                                                      | 22.9056(5)                                                                                     | 22.7862(8)                                                                                     | 22.8185(4)                                                                                     | 23.1974(5)                                                                                     |
| <i>c</i> [Å]                                                                | 37.3225(10)                                                                                    | 37.1554(7)                                                                                                     | 37.2615(5)                                                                                                      | 37.1096(5)                                                                                       | 36.9621(5)                                                                                      | 37.4928(8)                                                                                     | 37.2553(14)                                                                                    | 37.3420(8)                                                                                     | 37.9940(7)                                                                                     |
| $\alpha$ [°]                                                                | 90                                                                                             | 90                                                                                                             | 90                                                                                                              | 90                                                                                               | 90                                                                                              | 90                                                                                             | 90                                                                                             | 90                                                                                             | 90                                                                                             |
| $\beta$ [°]                                                                 | 90                                                                                             | 90                                                                                                             | 90                                                                                                              | 90                                                                                               | 90                                                                                              | 90                                                                                             | 90                                                                                             | 90                                                                                             | 90                                                                                             |
| $\gamma$ [°]                                                                | 120                                                                                            | 120                                                                                                            | 120                                                                                                             | 120                                                                                              | 120                                                                                             | 120                                                                                            | 120                                                                                            | 120                                                                                            | 120                                                                                            |
| <i>V</i> [Å <sup>3</sup> ]                                                  | 16832.0(10)                                                                                    | 16512.7(7)                                                                                                     | 16748.9                                                                                                         | 16551.8(5)                                                                                       | 16461.4(5)                                                                                      | 17035.8(8)                                                                                     | 16751.8(13)                                                                                    | 16838.5(7)                                                                                     | 17706.2(8)                                                                                     |
| <i>Z</i>                                                                    | 3.99996                                                                                        | 3.99996                                                                                                        | 3.99996                                                                                                         | 3.99996                                                                                          | 4                                                                                               | 4                                                                                              | 3.99996                                                                                        | 4                                                                                              | 3.99996                                                                                        |
| $\rho_{\text{calcd}}$ [g cm <sup>-3</sup> ]                                 | 0.823                                                                                          | 0.926                                                                                                          | 0.991                                                                                                           | 0.904                                                                                            | 0.914                                                                                           | 0.807                                                                                          | 0.822                                                                                          | 0.833                                                                                          | 0.863                                                                                          |
| $\mu$ [mm <sup>-1</sup> ]                                                   | 2.470                                                                                          | 2.610                                                                                                          | 3.651                                                                                                           | 2.529                                                                                            | 2.558                                                                                           | 2.939                                                                                          | 3.314                                                                                          | 0.63                                                                                           | 2.897                                                                                          |
| <i>F</i> (000)                                                              | 4288.0                                                                                         | 4672.0                                                                                                         | 5056.0                                                                                                          | 4672.0                                                                                           | 4672.0                                                                                          | 4256.0                                                                                         | 4272.0                                                                                         | 4336.0                                                                                         | 4624.0                                                                                         |
| Index ranges                                                                | -20 ≤ <i>h</i> ≤ 23<br>-25 ≤ <i>k</i> ≤ 25<br>-41 ≤ <i>l</i> ≤ 39                              | -20 ≤ <i>h</i> ≤ 23<br>-26 ≤ <i>k</i> ≤ 27<br>-44 ≤ <i>l</i> ≤ 43                                              | -28 ≤ <i>h</i> ≤ 28<br>-26 ≤ <i>k</i> ≤ 18<br>-45 ≤ <i>l</i> ≤ 46                                               | -28 ≤ <i>h</i> ≤ 28<br>-28 ≤ <i>k</i> ≤ 28<br>-46 ≤ <i>l</i> ≤ 46                                | -27 ≤ <i>h</i> ≤ 25<br>-28 ≤ <i>k</i> ≤ 28<br>-43 ≤ <i>l</i> ≤ 46                               | -23 ≤ <i>h</i> ≤ 22<br>-22 ≤ <i>k</i> ≤ 22<br>-35 ≤ <i>l</i> ≤ 37                              | -22 ≤ <i>h</i> ≤ 15<br>-22 ≤ <i>k</i> ≤ 22<br>-37 ≤ <i>l</i> ≤ 33                              | -28 ≤ <i>h</i> ≤ 22<br>-28 ≤ <i>k</i> ≤ 28<br>-46 ≤ <i>l</i> ≤ 29                              | -16 ≤ <i>h</i> ≤ 29<br>-27 ≤ <i>k</i> ≤ 25<br>-49 ≤ <i>l</i> ≤ 46                              |
| Reflns collected                                                            | 45568                                                                                          | 60558                                                                                                          | 73594                                                                                                           | 69421                                                                                            | 57708                                                                                           | 44069                                                                                          | 37180                                                                                          | 133920                                                                                         | 75940                                                                                          |
| unique reflns [ <i>R</i> <sub>int</sub> ]                                   | 8392[0.0657]                                                                                   | 10169 [0.0766]                                                                                                 | 11641 [0.0902]                                                                                                  | 11455[0.0952]                                                                                    | 11074[0.0742]                                                                                   | 6229 [0.0538]                                                                                  | 6133[0.1182]                                                                                   | 11604[0.1270]                                                                                  | 12869[0.1057]                                                                                  |
| data/restraints/parameters                                                  | 8392/79/403                                                                                    | 10169/122/447                                                                                                  | 11641/67/498                                                                                                    | 11455/48/511                                                                                     | 11074/144/391                                                                                   | 6229/0/409                                                                                     | 6133/55/409                                                                                    | 11604/62/409                                                                                   | 12869/2030/361                                                                                 |
| GOF on <i>F</i> <sup>2</sup>                                                | 1.073                                                                                          | 1.013                                                                                                          | 1.042                                                                                                           | 1.064                                                                                            | 1.039                                                                                           | 1.038                                                                                          | 1.068                                                                                          | 1.015                                                                                          | 1.069                                                                                          |
| <i>R</i> <sub>1</sub> , <i>wR</i> <sub>2</sub> [ <i>I</i> > 2σ( <i>I</i> )] | 0.0629, 0.1721                                                                                 | 0.0809, 0.2002                                                                                                 | 0.0757, 0.1927                                                                                                  | 0.0736, 0.1900                                                                                   | 0.0972, 0.2372                                                                                  | 0.0576, 0.1595                                                                                 | 0.1081, 0.2742                                                                                 | 0.0542, 0.1246                                                                                 | 0.0784, 0.2148                                                                                 |
| <i>R</i> <sub>1</sub> , <i>wR</i> <sub>2</sub> [all data]                   | 0.0927, 0.1912                                                                                 | 0.1194, 0.2235                                                                                                 | 0.1088, 0.2153                                                                                                  | 0.0964, 0.2032                                                                                   | 0.1467, 0.2771                                                                                  | 0.0796, 0.1777                                                                                 | 0.1938, 0.3396                                                                                 | 0.0765, 0.1395                                                                                 | 0.1087, 0.2431                                                                                 |
| $\Delta\rho_{\text{min}}/\Delta\rho_{\text{max}}$ (e·Å <sup>-3</sup> )      | 0.38/-0.28                                                                                     | 0.76/-0.38                                                                                                     | 0.71/-0.37                                                                                                      | 0.84/-0.38                                                                                       | 0.88/-0.29                                                                                      | 0.25/-0.30                                                                                     | 0.43/-0.57                                                                                     | 0.32/-0.28                                                                                     | 1.96/-1.70                                                                                     |
| Flack parameter                                                             | 0.048(11)                                                                                      | 0.150(11)                                                                                                      | 0.034(7)                                                                                                        | 0.056(6)                                                                                         | 0.104(14)                                                                                       | 0.007(7)                                                                                       | -0.006(13)                                                                                     | 0.118(12)                                                                                      | 0.409(6)                                                                                       |
| CCDC number                                                                 | 2056111                                                                                        | 2056112                                                                                                        | 2056113                                                                                                         | 2056114                                                                                          | 2056115                                                                                         | 2056116                                                                                        | 2056117                                                                                        | 2056118                                                                                        | 2056127                                                                                        |

**Table S5.** BVS analysis for **AIOC-99** to **AIOC-120**.

| <b>AIOC-99</b>  |                  | <b>AIOC-100</b>   |                  |
|-----------------|------------------|-------------------|------------------|
| Al1 3.134       | Co1 1.854        | Al1 3.113         | Co1 1.826        |
| Al1—O1 1.896(2) | Co1—O1 1.956(4)  | Al1—O1 1.895(3)   | Co1—O1 1.958(5)  |
| Al1—O1 1.896(2) | Co1—O3 2.054(3)  | Al1—O1 1.895(3)   | Co1—O3 2.064(3)  |
| Al1—O1 1.896(2) | Co1—O3 2.054(3)  | Al1—O1 1.895(3)   | Co1—O3 2.064(3)  |
| Al1—O2 1.886(3) | Co1—O3 2.054(3)  | Al1—O2 1.892(3)   | Co1—O3 2.064(3)  |
| Al1—O2 1.886(3) | Co1—N1 2.184(6)  | Al1—O2 1.892(3)   | Co1—N1 2.176(6)  |
| Al1—O2 1.886(3) |                  | Al1—O2 1.892(3)   |                  |
| <b>AIOC-101</b> |                  | <b>AIOC-102</b>   |                  |
| Al1 3.0159      | Co1 1.990        | Al1 3.081         | Co1 1.927        |
| Al1—O1 1.945(4) | Co1—O1 1.868(7)  | Al1—O1 1.898(6)   | Co1—O1 1.893(10) |
| Al1—O1 1.945(4) | Co1—O3 2.056(5)  | Al1—O1 1.898(6)   | Co1—O2 2.047(8)  |
| Al1—O1 1.945(4) | Co1—O3 2.055(5)  | Al1—O1 1.898(6)   | Co1—O2 2.047(8)  |
| Al1—O2 1.869(5) | Co1—O3 2.055(5)  | Al1—O3 1.896(7)   | Co1—O2 2.047(8)  |
| Al1—O2 1.869(5) | Co1—N1 2.170(11) | Al1—O3 1.896(7)   | Co1—N1 2.250(14) |
| Al1—O2 1.869(5) |                  | Al1—O3 1.896(7)   |                  |
| <b>AIOC-103</b> |                  | <b>AIOC-104</b>   |                  |
| Al1 3.081       | Co1 1.856        | Al1 3.157         | Co1 1.918        |
| Al1—O1 1.891(5) | Co1—O2 1.942(8)  | Al1—O1 1.882(6)   | Co1—O1 1.970(10) |
| Al1—O1 1.891(5) | Co1—O3 2.081(5)  | Al1—O1 1.882(6)   | Co1—O3 2.032(7)  |
| Al1—O1 1.891(5) | Co1—O3 2.081(5)  | Al1—O1 1.882(6)   | Co1—O3 2.032(7)  |
| Al1—O2 1.892(5) | Co1—O3 2.081(5)  | Al1—O2 1.894(7)   | Co1—O3 2.032(7)  |
| Al1—O2 1.892(5) | Co1—N1 2.096(10) | Al1—O2 1.894(7)   | Co1—N7 2.163(13) |
| Al1—O2 1.892(5) |                  | Al1—O2 1.894(7)   |                  |
| <b>AIOC-105</b> |                  | <b>AIOC-106</b>   |                  |
| Al1 3.081       | Co1 1.880        | Al1 3.157         | Mn1 1.934        |
| Al1—O1 1.894(6) | Co1—O2 1.963(10) | Al1—O1 1.889(2)   | Mn1—O1 2.029(4)  |
| Al1—O1 1.894(6) | Co1—O3 2.041(7)  | Al1—O1 1.889(2)   | Mn1—O3 2.132(4)  |
| Al1—O1 1.894(6) | Co1—O3 2.041(7)  | Al1—O1 1.889(2)   | Mn1—O3 2.132(4)  |
| Al1—O2 1.890(6) | Co1—O3 2.041(7)  | Al1—O2 1.899(3)   | Mn1—O3 2.132(4)  |
| Al1—O2 1.890(6) | Co1—N1 2.192(14) | Al1—O2 1.899(3)   | Mn1—N1 2.256(7)  |
| Al1—O2 1.890(6) |                  | Al1—O2 1.899(3)   |                  |
| <b>AIOC-107</b> |                  | <b>AIOC-108</b>   |                  |
| Al1 3.147       | Fe1 2.006        | Al1 3.129         | Zn1 1.939        |
| Al1—O1 1.890(2) | Fe1—O1 1.990(4)  | Al1—O1 1.8977(16) | Zn1—O2 1.960(3)  |
| Al1—O1 1.890(2) | Fe1—O3 2.077(3)  | Al1—O1 1.8977(16) | Zn1—O3 2.059(2)  |
| Al1—O1 1.890(2) | Fe1—O3 2.077(3)  | Al1—O1 1.8977(16) | Zn1—O3 2.059(2)  |
| Al1—O2 1.889(3) | Fe1—O3 2.077(3)  | Al1—O2 1.8861(19) | Zn1—O3 2.059(2)  |
| Al1—O2 1.889(3) | Fe1—N1 2.190(5)  | Al1—O2 1.8861(19) | Zn1—N1 2.178(4)  |
| Al1—O2 1.889(3) |                  | Al1—O2 1.8861(19) |                  |
| <b>AIOC-109</b> |                  | <b>AIOC-110</b>   |                  |
| Al1 3.130       | Co1 1.845        | Al1 3.168         | Fe1 2.009        |
| Al1—O1 1.896(3) | Co1—O1 1.959(5)  | Al1—O1 1.885(3)   | Fe1—O1 1.977(5)  |
| Al1—O1 1.896(3) | Co1—O3 2.058(5)  | Al1—O1 1.885(3)   | Fe1—O3 2.088(4)  |
| Al1—O1 1.896(3) | Co1—O3 2.058(5)  | Al1—O1 1.885(3)   | Fe1—O3 2.088(4)  |
| Al1—O2 1.887(4) | Co1—O3 2.058(5)  | Al1—O2 1.889(4)   | Fe1—O3 2.088(4)  |
| Al1—O2 1.887(4) | Co1—N1 2.172(7)  | Al1—O2 1.889(4)   | Fe1—N1 2.167(7)  |
| Al1—O2 1.887(4) |                  | Al1—O2 1.889(4)   |                  |

| <b>AIOC-111</b> |                 |                  |                  |
|-----------------|-----------------|------------------|------------------|
| Al1 3.070       | Cd1 2.142       |                  |                  |
| Al1—O1 1.896(4) | Cd1—O1 2.075(7) |                  |                  |
| Al1—O1 1.896(4) | Cd1—O3 2.294(5) |                  |                  |
| Al1—O1 1.896(4) | Cd1—O3 2.294(5) |                  |                  |
| Al1—O2 1.901(4) | Cd1—O3 2.294(5) |                  |                  |
| Al1—O2 1.901(4) | Cd1—N1 2.239(9) |                  |                  |
| Al1—O2 1.901(4) |                 |                  |                  |
| <b>AIOC-112</b> |                 |                  |                  |
| Al1 3.168       | Al2 3.168       | Co1 1.880        | Co2 1.831        |
| Al1—O1 1.902(4) | Al2—O1 1.910(5) | Co1—O5 1.963(10) | Co2—O1 1.946(4)  |
| Al1—O1 1.902(4) | Al2—O1 1.910(5) | Co1—O6 2.041(7)  | Co2—O7 2.076(6)  |
| Al1—O1 1.902(4) | Al2—O3 1.888(6) | Co1—O6 2.041(7)  | Co2—O9 2.052(5)  |
| Al1—O2 1.897(4) | Al2—O4 1.884(5) | Co1—O6 2.041(7)  | Co2—O10 2.058(6) |
| Al1—O2 1.898(4) | Al2—O5 1.900(4) | Co1—N2 2.192(14) | Co2—N1 2.204(5)  |
| Al1—O2 1.897(5) | Al2—O8 1.890(5) |                  |                  |
| <b>AIOC-113</b> |                 |                  |                  |
| Al1 3.200       | Al2 3.035       | Co1 1.844        | Co2 1.897        |
| Al1—O1 1.886(5) | Al2—O1 1.885(6) | Co1—O2 2.070(5)  | Co2—O1 1.941(5)  |
| Al1—O1 1.886(5) | Al2—O1 1.910(5) | Co1—O2 2.070(5)  | Co2—O7 2.040(6)  |
| Al1—O1 1.886(5) | Al2—O3 1.891(4) | Co1—O2 2.070(5)  | Co2—O8 2.049(7)  |
| Al1—O9 1.880(6) | Al2—O4 1.906(6) | Co1—O3 1.962(6)  | Co2—O10 2.063(7) |
| Al1—O9 1.880(6) | Al2—O5 1.917(5) | Co1—N1 2.117(7)  | Co2—N2 2.164(7)  |
| Al1—O9 1.880(6) | Al2—O6 1.908(5) |                  |                  |
| <b>AIOC-114</b> |                 |                  |                  |
| Al1 3.109       | Al2 3.141       | Co1 1.920        | Co2 1.855        |
| Al1—O1 1.888(5) | Al2—O2 1.894(4) | Co1—O3 1.984(7)  | Co2—O2 1.965(4)  |
| Al1—O2 1.886(5) | Al2—O2 1.894(4) | Co1—O9 2.039(6)  | Co2—O6 2.034(6)  |
| Al1—O2 1.914(5) | Al2—O2 1.894(4) | Co1—O9 2.039(6)  | Co2—O7 2.063(6)  |
| Al1—O3 1.888(4) | Al2—O5 1.886(5) | Co1—O9 2.039(6)  | Co2—O10 2.050(6) |
| Al1—O4 1.895(6) | Al2—O5 1.886(5) | Co1—N2 2.105(8)  | Co2—N1 2.188(6)  |
| Al1—O8 1.892(6) | Al2—O5 1.886(5) |                  |                  |
| <b>AIOC-115</b> |                 |                  |                  |
| Al1 3.104       | Al2 3.077       | Co1 1.917        | Co2 1.903        |
| Al1—O1 1.894(4) | Al2—O1 1.903(5) | Co1—O1 1.950(4)  | Co2—O2 1.962(6)  |
| Al1—O2 1.894(4) | Al2—O1 1.899(5) | Co1—O7 2.033(5)  | Co2—O3 2.042(5)  |
| Al1—O2 1.894(4) | Al2—O2 1.895(3) | Co1—O9 2.053(5)  | Co2—O7 2.042(5)  |
| Al1—O3 1.895(4) | Al2—O5 1.897(5) | Co1—O10 2.033(5) | Co2—O10 2.042(5) |
| Al1—O4 1.895(4) | Al2—O6 1.896(4) | Co1—N1 2.168(5)  | Co2—N1 2.153(8)  |
| Al1—O8 1.895(4) | Al2—O8 1.896(5) |                  |                  |
| <b>AIOC-116</b> |                 |                  |                  |
| Al1 3.078       | Al2 3.160       | Co1 1.932        | Co2 1.909        |
| Al1—O1 1.904(5) | Al2—O1 1.895(6) | Co1—O3 1.918(9)  | Co2—O1 1.947(5)  |
| Al1—O1 1.904(5) | Al2—O1 1.886(6) | Co1—O6 2.041(7)  | Co2—O8 2.062(7)  |
| Al1—O1 1.904(5) | Al2—O2 1.874(6) | Co1—O6 2.041(7)  | Co2—O9 1.992(9)  |
| Al1—O4 1.891(5) | Al2—O3 1.905(5) | Co1—O6 2.041(7)  | Co2—O10 2.075(8) |
| Al1—O4 1.891(5) | Al2—O5 1.894(6) | Co1—N2 2.206(11) | Co2—N1 2.177(7)  |
| Al1—O4 1.891(5) | Al2—O7 1.873(7) |                  |                  |
| <b>AIOC-117</b> |                 |                  |                  |

|                  |                  |                  |                  |
|------------------|------------------|------------------|------------------|
| Al1 3.153        | Al2 3.114        | Mn1 2.028        | Mn2 2.015        |
| Al1—O1 1.887(5)  | Al2—O1 1.888(6)  | Mn1—O4 2.004(8)  | Mn2—O1 1.997(5)  |
| Al1—O1 1.887(5)  | Al2—O1 1.902(6)  | Mn1—O9 2.130(6)  | Mn2—O7 2.133(7)  |
| Al1—O1 1.887(5)  | Al2—O3 1.915(6)  | Mn1—O9 2.130(6)  | Mn2—O8 2.132(7)  |
| Al1—O2 1.890(6)  | Al2—O4 1.893(4)  | Mn1—O9 2.130(6)  | Mn2—O10 2.152(8) |
| Al1—O2 1.890(6)  | Al2—O5 1.880(5)  | Mn1—N1 2.200(11) | Mn2—N2 2.196(6)  |
| Al1—O2 1.890(6)  | Al2—O6 1.882(6)  |                  |                  |
| <b>AIOC-118</b>  |                  |                  |                  |
| Al1 3.088        | Al2 3.064        | Fe1 1.919        | Fe2 2.231        |
| Al1—O1 1.936(12) | Al2—O1 1.876(13) | Fe1—O4 2.02(2)   | Fe2—O1 1.958(10) |
| Al1—O1 1.936(12) | Al2—O1 1.896(14) | Fe1—O9 2.094(13) | Fe2—O7 2.057(16) |
| Al1—O1 1.936(12) | Al2—O2 1.922(16) | Fe1—O9 2.094(13) | Fe2—O8 2.036(15) |
| Al1—O3 1.861(13) | Al2—O4 1.878(11) | Fe1—O9 2.094(13) | Fe2—O10 2.03(2)  |
| Al1—O3 1.861(13) | Al2—O5 1.924(14) | Fe1—N1 2.18(3)   | Fe2—N2 2.128(14) |
| Al1—O3 1.861(13) | Al2—O6 1.904(11) |                  |                  |
| <b>AIOC-119</b>  |                  |                  |                  |
| Al1 3.014        | Al2 3.066        | Zn1 1.828        | Zn2 1.880        |
| Al1—O1 1.897(3)  | Al2—O1 1.900(4)  | Zn1—O6 1.991(5)  | Zn2—O1 1.967(3)  |
| Al1—O1 1.897(3)  | Al2—O1 1.899(4)  | Zn1—O4 2.079(4)  | Zn2—O7 2.081(4)  |
| Al1—O1 1.897(3)  | Al2—O2 1.912(4)  | Zn1—O4 2.079(4)  | Zn2—O9 2.075(4)  |
| Al1—O3 1.914(3)  | Al2—O4 1.903(3)  | Zn1—O4 2.079(4)  | Zn2—O10 2.079(4) |
| Al1—O3 1.914(3)  | Al2—O5 1.889(3)  | Zn1—N2 2.189(6)  | Zn2—N1 2.166(4)  |
| Al1—O3 1.914(3)  | Al2—O6 1.892(4)  |                  |                  |
| <b>AIOC-120</b>  |                  |                  |                  |
| Al1 3.119        | Al2 2.978        | Cd1 2.206        | Cd2 2.211        |
| Al1—O2 1.887(6)  | Al2—O1 1.901(8)  | Cd1—O5 2.057(9)  | Cd2—O2 2.084(5)  |
| Al1—O2 1.887(6)  | Al2—O2 1.894(8)  | Cd1—O7 2.279(8)  | Cd2—O8 2.284(8)  |
| Al1—O2 1.887(6)  | Al2—O2 1.890(8)  | Cd1—O7 2.279(8)  | Cd2—O9 2.271(8)  |
| Al1—O3 1.898(6)  | Al2—O4 1.907(7)  | Cd1—O7 2.279(8)  | Cd2—O10 2.258(7) |
| Al1—O3 1.898(6)  | Al2—O5 1.904(5)  | Cd1—N2 2.247(12) | Cd2—N1 2.226(7)  |
| Al1—O3 1.898(6)  | Al2—O6 1.966(7)  |                  |                  |

**Table S6.** Direct aldol reactions catalyzed by AIOCs.<sup>[a]</sup>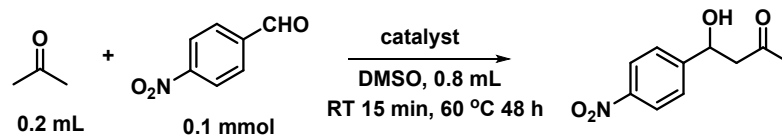

| Entry | catalyst                  | yield/ %                                 |
|-------|---------------------------|------------------------------------------|
| 1     | <b>AIOC-99 (10 mol%)</b>  | 79% <sup>[b]</sup>                       |
| 2     | <b>AIOC-109 (10 mol%)</b> | 87% <sup>[b]</sup> (88% <sup>[c]</sup> ) |
| 3     | <b>AIOC-112 (10 mol%)</b> | 88% <sup>[b]</sup>                       |
| 4     | <b>AIOC-99 (5 mol%)</b>   | 48% <sup>[b]</sup>                       |
| 5     | <b>AIOC-109 (5 mol%)</b>  | 67% <sup>[b]</sup>                       |
| 6     | <b>AIOC-112 (5 mol%)</b>  | 68% <sup>[b]</sup>                       |
| 7     | <b>Without Catalyst</b>   | none                                     |

[a] Firstly, the mixed solution of catalyst, acetone (0.2 mL) and DMSO (0.8 mL) was stirred at room temperature for 15 min. Then, 4-nitrobenzaldehyde (0.1 mmol) was added and the solution further stirred at 60 °C for 48h. [b] The yield of the isolated product based on 4-nitrobenzaldehyde. [c] The yield of isolated product based on 4-nitrobenzaldehyde after three runs.

## References

- [1] T. Ge, C. Zuo, H. Chen, Y. Muhammad, L. Wei, C. Li, *Ind. Eng. Chem. Res.* **2019**, *58*, 3595-3605.
- [2] H.-L. Zheng, S.-L. Huang, M.-B. Luo, Q. Wei, E.-X. Chen, L. He, Q. Lin, *Angew. Chem. Int. Ed.* **2020**, *59*, 23588-23592.
- [3] W. Zheng, R. Tan, L. Zhao, Y. Chen, C. Xiong, D. Yin, *RSC Adv.* **2014**, *4*, 11732-11739.
- [4] Q. Wang, M. Liao, Z. Mu, X. Zhang, H. Dong, Z. Liang, J. Luo, Y. Yang, F. Wu, *J. Phys. Chem. C* **2020**, *124*, 886-895.
- [5] N. Andreu, D. Flahaut, R. Dedryvère, M. Minvielle, H. Martinez, D. Gonbeau, *ACS Appl. Mater. Interfaces* **2015**, *7*, 6629-6636.
- [6] H. Virieux, M. Le Troedec, A. Cros-Gagneux, W.-S. Ojo, F. Delpech, C. Nayral, H. Martinez, B. Chaudret, *J. Am. Chem. Soc.* **2012**, *134*, 19701-19708.
- [7] Z. Zhang, M. Zhang, X. Li, K. Li, X. Lü, Y. Wang, X. Zhu, *ACS Sustainable Chem. Eng.* **2018**, *6*, 11614-11623.
- [8] Z. J. Yu, M. Rajesh Kumar, Y. Chu, H. X. Hao, Q. Y. Wu, H. D. Xie, *ACS Sustainable Chem. Eng.* **2018**, *6*, 155-164.
- [9] Y. Quan, W. Shi, Y. Song, X. Jiang, C. Wang, W. Lin, *J. Am. Chem. Soc.* **2021**, *143*, 3075-3080.
- [10] G. K. Mor, T. P. Le, K. Vakhshouri, D. R. Kozub, E. D. Gomez, *ACS Appl. Mater. Interfaces* **2014**, *6*, 19638-19643.
